# Supplementary material for: Characterization of Growth and Metabolism of the Haloalkaliphile Natronomonas pharaonis
Source: PLOS journal article supplement (doi:10.1371/journal.pcbi.1000799), 2010-06-03
Supplement: S2 (10.1371/journal.pcbi.1000799.s002) [file journal.pcbi.1000799.s002]

## Text S1 - Supplementary Information

### For: Characterization of growth and metabolism of the haloalkaliphile *Natronomonas pharaonis*

By: Gonzalez *et al.*

#### Determination of oxygen consumption

The amount of dissolved oxygen in the medium (solution) was continuously monitored using the “Fibox 3-trace v3, fiber-optic oxygen meter” from Precision Sensing GmbH (Regensburg, Germany). Under conditions identical to those used in the aerobic cultures, argon was blown into a flask that contains only medium, until oxygen saturation dropped to zero. At that point, we removed the argon source and equilibrated the flask with air. We then used the rate at which oxygen dissolved into the medium to characterize oxygen dissolution kinetics. Specifically, the oxygen transfer rate (OTR) was defined as

$$OTR = \frac{dx}{dt} = k(x_{max} - x) \quad (1)$$

where  $x$  is the amount of dissolved oxygen, and  $x_{max}$  is the maximum value of  $x$ , which indicates saturation. The data and the fitted model are shown in Figure 1. With the appropriate parameters for Equation (1), we then calculated the oxygen consumption rate of a culture at time  $t$  using

$$consumption(t) = k(x_{max} - x) + m \quad (2)$$

where  $m$  is the current rate at which  $x$  is changing in the culture. For the sake of completeness, we note that Equation (1) has the analytical solution

$$x = x_{max} - (x_{max} - x_0)e^{-kt} \quad (3)$$

where  $x(0) = x_0$  is the initial condition. In our calculations, oxygen saturation was taken to be 2.18 mg/L or 13.6  $\mu\text{mol/L}$  (taken from *Int. J. Salt Lake Res.* 1:1-6).

**Table 1: Composition of defined medium used for *Natronomonas pharaonis*<sup>a</sup>**

| Description                                           | Value  | Description                            | Value |
|-------------------------------------------------------|--------|----------------------------------------|-------|
| NaCl                                                  | 3.4 M  | FeSO <sub>4</sub> × 7 H <sub>2</sub> O | 5 μM  |
| Na <sub>2</sub> CO <sub>3</sub>                       | 175 mM | CuSO <sub>4</sub> × 5 H <sub>2</sub> O | 4 μM  |
| KCl                                                   | 27 mM  | MnCl <sub>2</sub>                      | 4 μM  |
| Na <sub>2</sub> HPO <sub>4</sub> × H <sub>2</sub> O   | 2mM    | CaCl <sub>2</sub> × 2 H <sub>2</sub> O | 3 μM  |
| NaH <sub>2</sub> PO <sub>4</sub> × 7 H <sub>2</sub> O | 2mM    | ZnSO <sub>4</sub> × 7 H <sub>2</sub> O | 3μM   |
| MgSO <sub>4</sub> × 7 H <sub>2</sub> O                | 1mM    | Na-Acetate                             | 25 mM |
| NH <sub>4</sub> Cl                                    | 12mM   |                                        |       |

<sup>a</sup>pH was adjusted to 9.2

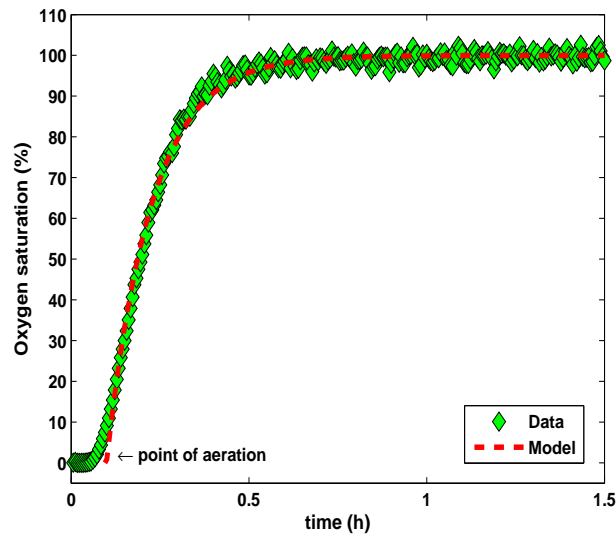

**Figure 1: Dissolution kinetics of oxygen.** The graph shows the velocity at which oxygen dissolves into the growth medium (cell-free) under the conditions used. This information was used to calculate the respiratory rate of cells during growth.

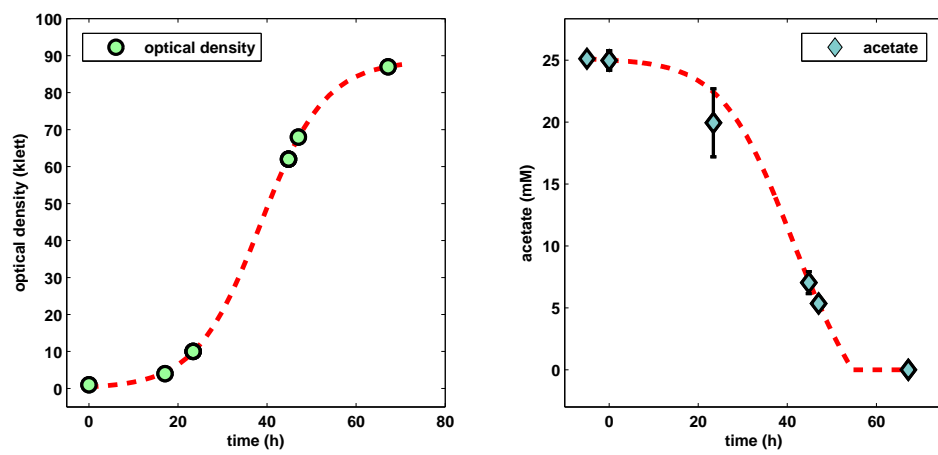

**Figure 2: Growth on acetate.** *Natronomonas pharaonis* was grown aerobically on a single carbon source: acetate. The graph on the left shows the population level (OD) and the graph on the right shows the depletion of acetate in the medium. Acetate concentrations were measured at different time points, at least in duplicate (error bars provided), using the K-ACETRM 10/06 assay kit from Megazyme (Wicklow, Ireland). The red broken curves represent fitted models.
