# Supplementary material for: Characterization of Growth and Metabolism of the Haloalkaliphile Natronomonas pharaonis
Source: PLoS Comput Biol. 2010 Jun 3;6(6):e1000799. doi: 10.1371/journal.pcbi.1000799 (PMC2881530; doi:10.1371/journal.pcbi.1000799)
Supplement: Table S1 — Reconstructed network in tabular format. (0.39 MB XLS) [file pcbi.1000799.s001.xls]

## Sheet: Metabolites
Notes: *The term abundance under the ionization_info field refers to the relative abundance of the dominant microspecies for the molecule. *Ids that start with „CE“ refer to metabolites in the extracellular space.
id	name	synonyms	formula	ionization_info
C00001	H2O	H2O; Water; Water (JP14)	H2O	charge=0; abundance=99.99998004738083
C00002	ATP	ATP; Adenosine 5'-triphosphate	C10H12N5O13P3	charge=-4; abundance=97.50950935968145
C00003	NAD+	NAD+; NAD; Nicotinamide adenine dinucleotide; DPN; Diphosphopyridine nucleotide; Nadide; Nadide (JAN)	C21H26N7O14P2	charge=-1; abundance=99.56993166853034
C00004	NADH	NADH; DPNH	C21H27N7O14P2	charge=-2; abundance=99.93376166940484
C00005	NADPH	NADPH; TPNH	C21H26N7O17P3	charge=-4; abundance=99.91657988042452
C00006	NADP+	NADP+; NADP; Nicotinamide adenine dinucleotide phosphate; beta-Nicotinamide adenine dinucleotide phosphate; TPN; Triphosphopyridine nucleotide	C21H25N7O17P3	charge=-3; abundance=99.71809910922329
C00007	Oxygen	Oxygen; O2; Oxygen (JP14)	O2	charge=0; abundance=100.0
C00008	ADP	ADP; Adenosine 5'-diphosphate	C10H12N5O10P2	charge=-3; abundance=97.48424026326519
C00009	Orthophosphate	Orthophosphate; Phosphate	HO4P	charge=-2; abundance=33.03363409220135
C00010	CoA	CoA; Coenzyme A; CoA-SH	C21H32N7O16P3S	charge=-4; abundance=92.09563811575796
C00011	CO2	CO2; Carbon dioxide; Carbon dioxide (JP14)	CO2	charge=0; abundance=100.0
C00013	Pyrophosphate	Pyrophosphate; Pyrophosphoric acid; Diphosphate; PPi	O7P2	charge=-4; abundance=92.01209026027458
C00014	NH3	NH3; Ammonia	H3N	charge=0; abundance=57.878791444426355
C00015	UDP	UDP; Uridine 5'-diphosphate	C9H11N2O12P2	charge=-3; abundance=81.3281425535885
C00016	FAD	FAD; Flavin adenine dinucleotide; Flavin adenine dinucleotide (JAN)	C27H30N9O15P2	charge=-3; abundance=99.02758981653665
C00019	S-Adenosyl-L-methionine	S-Adenosyl-L-methionine; S-Adenosylmethionine; Acylcarnitine	C15H23N6O5S	charge=1; abundance=72.17714513086467
C00020	AMP	AMP; Adenosine 5'-monophosphate; Adenylic acid; Adenylate; 5'-AMP; 5'-Adenylic acid; 5'-Adenosine monophosphate; Adenosine 5'-phosphate	C10H12N5O7P	charge=-2; abundance=99.77420218519191
C00021	S-Adenosyl-L-homocysteine	S-Adenosyl-L-homocysteine; S-Adenosylhomocysteine	C14H20N6O5S	charge=0; abundance=76.03590349170535
C00022	Pyruvate	Pyruvate; Pyruvic acid; 2-Oxopropanoate; 2-Oxopropanoic acid; Pyroracemic acid	C3H3O3	charge=-1; abundance=99.99991486130914
C00023	Iron	Iron; Fe2+; Fe(II); Fe3+; Fe(III)	Fe	charge=0; abundance=100.0
C00024	Acetyl-CoA	Acetyl-CoA; Acetyl coenzyme A	C23H34N7O17P3S	charge=-4; abundance=99.88369291831165
C00025	L-Glutamate	L-Glutamate; L-Glutamic acid; L-Glutaminic acid; L-Glutamic acid (JAN)	C5H8NO4	charge=-1; abundance=77.46195690343417
C00026	2-Oxoglutarate	2-Oxoglutarate; Oxoglutaric acid; 2-Ketoglutaric acid; alpha-Ketoglutaric acid	C5H4O5	charge=-2; abundance=99.99926530812007
C00027	H2O2	H2O2; Hydrogen peroxide; Oxydol; Oxydol (JP14)	H2O2	charge=0; abundance=99.6993322142521
C00029	UDPglucose	UDPglucose; UDP-D-glucose; UDP-glucose; Uridine diphosphate glucose	C15H22N2O17P2	charge=-2; abundance=83.33537317786362
C00031	D-Glucose	D-Glucose; Grape sugar; Dextrose; Glucose (JP14)	C6H12O6	charge=0; abundance=99.49903603236149
C00033	Acetate	Acetate; Acetic acid; Ethanoic acid; Glacial acetic acid; Acetic acid (JP14/USP); Glacial acetic acid (JP14)	C2H3O2	charge=-1; abundance=99.99650518250644
C00034	Manganese	Manganese	Mn	charge=0; abundance=100.0
C00035	GDP	GDP; Guanosine 5'-diphosphate; Guanosine diphosphate	C10H12N5O11P2	charge=-3; abundance=91.15991119706773
C00036	Oxaloacetate	Oxaloacetate; Oxalacetic acid; Oxaloacetic acid; 2-Oxobutanedioic acid; Oxosuccinic acid; keto-Oxaloacetate	C4H2O5	charge=-2; abundance=99.99331585461526
C00037	Glycine	Glycine; Aminoacetic acid; Gly; Glycine (JP14/USP)	C2H5NO2	charge=0; abundance=63.49183102353657
C00038	Zinc	Zinc	Zn	charge=0; abundance=100.0
C00041	L-Alanine	L-Alanine; L-2-Aminopropionic acid; L-alpha-Alanine; L-Alanine (JAN/USP)	C3H7NO2	charge=0; abundance=74.98994338396744
C00042	Succinate	Succinate; Succinic acid; Butanedionic acid; Ethylenesuccinic acid	C4H4O4	charge=-2; abundance=99.95139257839497
C00044	GTP	GTP; Guanosine 5'-triphosphate	C10H12N5O14P3	charge=-4; abundance=91.17469141459428
C00047	L-Lysine	L-Lysine; Lysine acid; 2,6-Diaminohexanoic acid	C6H15N2O2	charge=1; abundance=72.54563930860341
C00048	Glyoxylate	Glyoxylate; Glyoxalate; Glyoxylic acid	C2HO3	charge=-1; abundance=99.99995969931264
C00049	L-Aspartate	L-Aspartate; L-Aspartic acid; 2-Aminosuccinic acid; L-Aspartic acid (JAN)	C4H6NO4	charge=-1; abundance=80.42803910256036
C00051	Glutathione	Glutathione; Reduced glutathione; 5-L-Glutamyl-L-cysteinylglycine; N-(N-gamma-L-Glutamyl-L-cysteinyl)glycine; gamma-L-Glutamyl-L-cysteinyl-glycine; GSH; Glutathione (Reduced type) (JP14)	C10H16N3O6S	charge=-1; abundance=60.61385631414718
C00052	UDP-D-galactose	UDP-D-galactose; UDPgalactose; UDP-D-galactopyranose	C15H22N2O17P2	charge=-2; abundance=83.33537317786362
C00053	3'-Phosphoadenylyl sulfate	3'-Phosphoadenylyl sulfate; 3'-Phosphoadenosine 5'-phosphosulfate; 3'-Phospho-5'-adenylyl sulfate; PAPS	C10H11N5O13P2S	charge=-4; abundance=99.88383319785154
C00054	Adenosine 3',5'-bisphosphate	Adenosine 3',5'-bisphosphate; PAP; 3'-Phosphoadenylate; Phosphoadenosine phosphate	C10H11N5O10P2	charge=-4; abundance=99.70512134570559
C00055	CMP	CMP; Cytidine-5'-monophosphate; Cytidylic acid	C9H12N3O8P	charge=-2; abundance=99.79430130908162
C00058	Formate	Formate; Methanoic acid; Formic acid	CHO2	charge=-1; abundance=99.99814172530111
C00059	Sulfate	Sulfate; Sulfuric acid	O4S	charge=-2; abundance=99.99999212182922
C00061	FMN	FMN; Riboflavin-5-phosphate; Flavin mononucleotide	C17H18N4O9P	charge=-3; abundance=98.73659329956389
C00062	L-Arginine	L-Arginine; (S)-2-Amino-5-guanidinovaleric acid	C6H15N4O2	charge=1; abundance=57.10287159468652
C00063	CTP	CTP; Cytidine 5'-triphosphate; Cytidine triphosphate	C9H12N3O14P3	charge=-4; abundance=97.52000630993857
C00064	L-Glutamine	L-Glutamine; L-2-Aminoglutaramic acid; L-Glutamine (JAN)	C5H10N2O3	charge=0; abundance=67.22841407333459
C00065	L-Serine	L-Serine; L-2-Amino-3-hydroxypropionic acid; L-3-Hydroxy-alanine; L-Serine (JAN/USP)	C3H6NO3	charge=-1; abundance=53.94525751411381
C00068	Thiamin diphosphate	Thiamin diphosphate; Thiamine diphosphate; Thiamin pyrophosphate; TPP; ThPP	C12H16N4O7P2S	charge=-2; abundance=97.49685424595388
C00070	Copper	Copper; Cu+; Cu2+	Cu	charge=0; abundance=100.0
C00073	L-Methionine	L-Methionine; L-2-Amino-4methylthiobutyric acid; L-Methionine (JP14/USP)	C5H11NO2S	charge=0; abundance=76.07142238304881
C00074	Phosphoenolpyruvate	Phosphoenolpyruvate; Phosphoenolpyruvic acid; PEP	C3H2O6P	charge=-3; abundance=99.89436844403929
C00075	UTP	UTP; Uridine 5'-triphosphate; Uridine triphosphate	C9H11N2O15P3	charge=-4; abundance=81.34132817602853
C00077	L-Ornithine	L-Ornithine; (S)-2,5-diaminovaleric acid; (S)-2,5-Diaminopentanoic acid; (S)-2,5-Diaminopentanoate	C5H13N2O2	charge=1; abundance=72.19227108588794
C00078	L-Tryptophan	L-Tryptophan; (S)-alpha-Amino-beta-(3-indolyl)-propionic acid; L-Tryptophan (JP14/USP)	C11H12N2O2	charge=0; abundance=71.34024695000288
C00079	L-Phenylalanine	L-Phenylalanine; (S)-alpha-Amino-beta-phenylpropionic acid; L-Phenylalanine (JP14)	C9H11NO2	charge=0; abundance=73.67356392103841
C00080	H+	H+	H	charge=1; abundance=100.0
C00081	ITP	ITP; Inosine 5'-triphosphate; Inosine triphosphate; Inosine tripolyphosphate	C10H10N4O14P3	charge=-5; abundance=52.458015217203645
C00082	L-Tyrosine	L-Tyrosine; (S)-3-(p-Hydroxyphenyl)alanine; (S)-2-Amino-3-(p-hydroxyphenyl)propionic acid; L-Tyrosine (JAN/USP)	C9H11NO3	charge=0; abundance=56.88240009892337
C00084	Acetaldehyde	Acetaldehyde; Ethanal	C2H4O	charge=0; abundance=99.99968717063861
C00085	D-Fructose 6-phosphate	D-Fructose 6-phosphate; D-Fructose 6-phosphoric acid; Neuberg ester	C6H11O9P	charge=-2; abundance=94.89239272331007
C00086	Urea	Urea; Carbamide; Urea (JP14/USP); Pastaron (TN)	CH4N2O	charge=0; abundance=99.99997902491063
C00087	Sulfur	Sulfur; S; Sulfur, precipitated	S	charge=0; abundance=100.0
C00088	Nitrite	Nitrite	NO2	charge=-1; abundance=99.9997910707894
C00091	Succinyl-CoA	Succinyl-CoA; Succinyl coenzyme A	C25H35N7O19P3S	charge=-5; abundance=99.90757367919889
C00094	Sulfite	Sulfite	O3S	charge=-2; abundance=54.768538833650354
C00095	D-Fructose	D-Fructose; Levulose; Fruit sugar; D-Arabino-hexulose	C6H12O6	charge=0; abundance=95.05981219069702
C00097	L-Cysteine	L-Cysteine; L-2-Amino-3-mercaptopropionic acid; L-Cysteine (JAN)	C3H7NO2S	charge=0; abundance=51.46777058886698
C00098	Oligopeptide	Oligopeptide	C2H4NO2R(C2H2NOR)n
C00099	beta-Alanine	beta-Alanine; 3-Aminopropionic acid; 3-Aminopropanoate	C3H7NO2	charge=0; abundance=95.30090450989086
C00100	Propanoyl-CoA	Propanoyl-CoA; Propionyl-CoA; Propionyl coenzyme A	C24H36N7O17P3S	charge=-4; abundance=99.88369291831165
C00101	Tetrahydrofolate	Tetrahydrofolate; 5,6,7,8-Tetrahydrofolate; Tetrahydrofolic acid; THF; (6S)-Tetrahydrofolate; (6S)-Tetrahydrofolic acid; (6S)-THFA	C19H21N7O6	charge=-2; abundance=99.24301017712862
C00103	D-Glucose 1-phosphate	D-Glucose 1-phosphate; alpha-D-Glucose 1-phosphate; Cori ester; D-Glucose alpha-1-phosphate	C6H11O9P	charge=-2; abundance=99.7746229813164
C00104	IDP	IDP; Inosine 5'-diphosphate; Inosine diphosphate	C10H10N4O11P2	charge=-4; abundance=52.449508956510186
C00105	UMP	UMP; Uridylic acid; Uridine monophosphate; Uridine 5'-monophosphate; 5'Uridylic acid	C9H11N2O9P	charge=-2; abundance=83.23831550521847
C00106	Uracil	Uracil; Uracil (JAN)	C4H4N2O2	charge=0; abundance=85.44338792363693
C00107	Dipeptide	Dipeptide	C4H6N2O3R2
C00108	Anthranilate	Anthranilate; Anthranilic acid; o-Aminobenzoic acid; Vitamin L1; 2-Aminobenzoate	C7H6NO2	charge=-1; abundance=99.99219020325451
C00109	2-Oxobutanoate	2-Oxobutanoate; 2-Ketobutyric acid; 2-Oxobutyric acid; 2-Oxobutyrate; 2-Oxobutanoic acid	C4H5O3	charge=-1; abundance=99.99984618937538
C00111	Glycerone phosphate	Glycerone phosphate; Dihydroxyacetone phosphate	C3H5O6P	charge=-2; abundance=99.83252920703555
C00112	CDP	CDP; Cytidine 5'-diphosphate; Cytidine diphosphate	C9H12N3O11P2	charge=-3; abundance=97.50419808538363
C00116	Glycerol	Glycerol; Glycerin; 1,2,3-Trihydroxypropane; 1,2,3-Propanetriol; Glycerin (JP14/USP)	C3H8O3	charge=0; abundance=99.99751977995435
C00117	D-Ribose 5-phosphate	D-Ribose 5-phosphate; Ribose 5-phosphate	C5H9O8P	charge=-2; abundance=99.33197684277613
C00118	D-Glyceraldehyde 3-phosphate	D-Glyceraldehyde 3-phosphate; (2R)-2-Hydroxy-3-(phosphonooxy)-propanal	C3H5O6P	charge=-2; abundance=99.72056272924983
C00119	5-Phospho-alpha-D-ribose 1-diphosphate	5-Phospho-alpha-D-ribose 1-diphosphate; 5-Phosphoribosyl diphosphate; 5-Phosphoribosyl 1-pyrophosphate; PRPP	C5H8O14P3	charge=-5; abundance=97.32109966240455
C00120	Biotin	Biotin; D-Biotin; Vitamin H; Coenzyme R; Biotin (JAN/USP)	C10H15N2O3S	charge=-1; abundance=99.99388235566177
C00121	D-Ribose	D-Ribose	C5H10O5	charge=0; abundance=99.50771600901487
C00122	Fumarate	Fumarate; Fumaric acid; trans-Butenedioic acid	C4H2O4	charge=-2; abundance=99.99741491139237
C00123	L-Leucine	L-Leucine; 2-Amino-4-methylvaleric acid; (2S)-alpha-2-Amino-4-methylvaleric acid; (2S)-alpha-Leucine; L-Leucine (JP14/USP)	C6H13NO2	charge=0; abundance=76.76336790713789
C00124	D-Galactose	D-Galactose	C6H12O6	charge=0; abundance=99.49903603236149
C00125	Ferricytochrome c	Ferricytochrome c	X
C00126	Ferrocytochrome c	Ferrocytochrome c	HX
C00129	Isopentenyl diphosphate	Isopentenyl diphosphate; delta3-Isopentenyl diphosphate; delta3-Methyl-3-butenyl diphosphate	C5H9O7P2	charge=-3; abundance=97.53045670508767
C00130	IMP	IMP; Inosinic acid; Inosine monophosphate; Inosine 5'-monophosphate; Inosine 5'-phosphate; 5'-Inosinate; 5'-Inosinic acid; 5'-Inosine monophosphate; 5'-IMP	C10H10N4O8P	charge=-3; abundance=53.68157852422031
C00131	dATP	dATP; 2'-Deoxyadenosine 5'-triphosphate; Deoxyadenosine 5'-triphosphate; Deoxyadenosine triphosphate	C10H12N5O12P3	charge=-4; abundance=97.53257820685424
C00134	Putrescine	Putrescine; 1,4-Butanediamine; 1,4-Diaminobutane; Tetramethylenediamine	C4H14N2	charge=2; abundance=88.43016700863977
C00135	L-Histidine	L-Histidine; (S)-alpha-Amino-1H-imidazole-4-propionic acid; L-Histidine (JAN/USP)	C6H9N3O2	charge=0; abundance=64.00100455060479
C00136	Butanoyl-CoA	Butanoyl-CoA	C25H38N7O17P3S	charge=-4; abundance=99.88369291831165
C00138	Reduced ferredoxin	Reduced ferredoxin	RH
C00139	Oxidized ferredoxin	Oxidized ferredoxin	R
C00141	3-Methyl-2-oxobutanoic acid	3-Methyl-2-oxobutanoic acid; 3-Methyl-2-oxobutyric acid; 3-Methyl-2-oxobutanoate; 2-Oxo-3-methylbutanoate; 2-Oxoisovalerate; 2-Oxoisopentanoate; alpha-Ketovaline; 2-Ketovaline; 2-Keto-3-methylbutyric acid	C5H7O3	charge=-1; abundance=99.99976472022459
C00143	5,10-Methylenetetrahydrofolate	5,10-Methylenetetrahydrofolate; (6R)-5,10-Methylenetetrahydrofolate; 5,10-Methylene-THF	C20H21N7O6	charge=-2; abundance=99.22362218901591
C00144	GMP	GMP; Guanosine 5'-phosphate; Guanosine monophosphate; Guanosine 5'-monophosphate; Guanylic acid	C10H12N5O8P	charge=-2; abundance=93.30130683365914
C00147	Adenine	Adenine; 6-Aminopurine; Adenine (JAN/USP)	C5H5N5	charge=0; abundance=87.95809458377013
C00148	L-Proline	L-Proline; 2-Pyrrolidinecarboxylic acid; L-Proline (JAN/USP)	C5H9NO2	charge=0; abundance=99.53657991139148
C00149	(S)-Malate	(S)-Malate; L-Malate; L-Apple acid; L-Malic acid; L-2-Hydroxybutanedioic acid	C4H4O5	charge=-2; abundance=99.98608691398819
C00150	Molybdenum	Molybdenum	Mo	charge=0; abundance=100.0
C00152	L-Asparagine	L-Asparagine; 2-Aminosuccinamic acid	C4H7N2O3	charge=-1; abundance=78.65814994184792
C00154	Palmitoyl-CoA	Palmitoyl-CoA; Hexadecanoyl-CoA	C37H62N7O17P3S	charge=-4; abundance=99.88369291831165
C00155	L-Homocysteine	L-Homocysteine; L-2-Amino-4-mercaptobutyric acid	C4H9NO2S	charge=0; abundance=71.10645875416816
C00158	Citrate	Citrate; Citric acid; 2-Hydroxy-1,2,3-propanetricarboxylic acid; 2-Hydroxytricarballylic acid; Anhydrous citric acid (JP14)	C6H5O7	charge=-3; abundance=99.9739932903922
C00159	D-Mannose	D-Mannose; Mannose; Seminose; Carubinose	C6H12O6	charge=0; abundance=99.49903603236149
C00163	Propanoate	Propanoate; Propionate; Propanoic acid; Propionic acid	C3H5O2	charge=-1; abundance=99.99431609929249
C00164	Acetoacetate	Acetoacetate; 3-Oxobutanoic acid; beta-Ketobutyric acid; Acetoacetic acid	C4H5O3	charge=-1; abundance=99.99888012778119
C00166	Phenylpyruvate	Phenylpyruvate; Phenylpyruvic acid; alpha-Ketohydrocinnamic acid; keto-Phenylpyruvate; 3-Phenyl-2-oxopropanoate	C9H7O3	charge=-1; abundance=99.99977675958219
C00167	UDPglucuronate	UDPglucuronate; UDP-D-glucuronate; UDP-glucuronate	C15H19N2O18P2	charge=-3; abundance=83.35312061177272
C00168	Hydroxypyruvate	Hydroxypyruvate; Hydroxypyruvic acid; 3-Hydroxypyruvate; 3-Hydroxypyruvic acid	C3H3O4	charge=-1; abundance=99.99898431531047
C00169	Carbamoyl phosphate	Carbamoyl phosphate	CH2NO5P	charge=-2; abundance=99.74534569130769
C00175	Cobalt	Cobalt; Co2+	Co	charge=2; abundance=100.0
C00178	Thymine	Thymine	C5H6N2O2	charge=0; abundance=91.33500540412527
C00179	Agmatine	Agmatine; (4-Aminobutyl) guanidine	C5H16N4	charge=2; abundance=85.69475030799929
C00183	L-Valine	L-Valine; 2-Amino-3-methylbutyric acid; L-Valine (JP14/USP)	C5H11NO2	charge=0; abundance=79.89255209424152
C00188	L-Threonine	L-Threonine; 2-Amino-3-hydroxybutyric acid; L-Threonine (JP14/USP)	C4H9NO3	charge=0; abundance=50.14343709987108
C00194	Cobamide coenzyme	Cobamide coenzyme; Adenosylcobalamin; Deoxyadenosylcobalamin; Cobamamide; Vitamin B12 coenzyme; 5,6-Dimethylbenzimidazolyl-5-deoxyadenosyl-cobamide; (5'-Deoxy-5'-adenosyl)cobamide coenzyme; (5,6-Dimethylbenzimidazolyl)cobamide coenzyme; alpha-(5,6-Dimethylbenzimidazolyl)cobamide coenzyme; 5'-Deoxy-5'-adenosylcobalamin; 5'-Deoxy-5'-adenosyl vitamin B12; 5'-Deoxy-5'-adenosyl-5,6-dimethylbenzimidazo…	C72H100CoN18O17P	charge=0; abundance=99.82994748859048
C00197	3-Phospho-D-glycerate	3-Phospho-D-glycerate; D-Glycerate 3-phosphate	C3H4O7P	charge=-3; abundance=99.69861904159342
C00198	D-Glucono-1,5-lactone	D-Glucono-1,5-lactone; Gluconic lactone; Gluconic acid lactone; 1,5-Gluconolactone; delta-Gluconolactone; D-Gluconolactone; Glucarolactone; D-Aldonolactone; D-threo-Aldono-1,5-lactone	C6H10O6	charge=0; abundance=99.75982836356565
C00199	D-Ribulose 5-phosphate	D-Ribulose 5-phosphate	C5H9O8P	charge=-2; abundance=99.35408574322675
C00204	2-Dehydro-3-deoxy-D-gluconate	2-Dehydro-3-deoxy-D-gluconate	C6H9O6	charge=-1; abundance=99.99421229969008
C00206	dADP	dADP; 2'-Deoxyadenosine 5'-diphosphate	C10H12N5O9P2	charge=-3; abundance=97.51676755400875
C00209	Oxalate	Oxalate; Oxalic acid; Ethanedioic acid	C2O4	charge=-2; abundance=99.99871110543825
C00212	Adenosine	Adenosine; Adenosine (JAN/USP); Adenocard (TN)	C10H13N5O4	charge=0; abundance=99.95156139390748
C00213	Sarcosine	Sarcosine; N-Methylglycine	C3H7NO2	charge=0; abundance=95.68564412918683
C00214	Thymidine	Thymidine; Deoxythymidine	C10H14N2O5	charge=0; abundance=90.12423384275952
C00222	3-Oxopropanoate	3-Oxopropanoate; Malonate semialdehyde	C3H3O3	charge=-1; abundance=99.99922160198876
C00224	Adenylylsulfate	Adenylylsulfate; Adenosine 5'-phosphosulfate; APS	C10H12N5O10PS	charge=-2; abundance=99.95177720993458
C00227	Acetyl phosphate	Acetyl phosphate	C2H3O5P	charge=-2; abundance=99.81153659428185
C00229	Acyl-carrier protein	Acyl-carrier protein; ACP; [Acyl-carrier protein]; Holo-[acyl-carrie-protein]	HSR
C00232	Succinate semialdehyde	Succinate semialdehyde; Succinic semialdehyde	C4H5O3	charge=-1; abundance=99.99860942099083
C00233	4-Methyl-2-oxopentanoate	4-Methyl-2-oxopentanoate; 2-Oxoisocaproate	C6H9O3	charge=-1; abundance=99.99966267413294
C00234	10-Formyltetrahydrofolate	10-Formyltetrahydrofolate; 10-Formyl-THF	C20H21N7O7	charge=-2; abundance=99.24420245167748
C00235	Dimethylallyl diphosphate	Dimethylallyl diphosphate; Prenyl diphosphate; 2-Isopentenyl diphosphate; delta2-Isopentenyl diphosphate; delta-Prenyl diphosphate	C5H9O7P2	charge=-3; abundance=97.53229924896758
C00236	3-Phospho-D-glyceroyl phosphate	3-Phospho-D-glyceroyl phosphate; 1,3-Bisphospho-D-glycerate; (R)-2-Hydroxy-3-(phosphonooxy)-1-monoanhydride with phosphoric; propanoic acid	C3H4O10P2	charge=-4; abundance=99.45338714392945
C00238	Potassium	Potassium; K+	K	charge=1; abundance=100.0
C00239	dCMP	dCMP; Deoxycytidylic acid; Deoxycytidine monophosphate; Deoxycytidylate; 2'-Deoxycytidine 5'-monophosphate	C9H12N3O7P	charge=-2; abundance=99.81792974805735
C00242	Guanine	Guanine; 2-Amino-6-hydroxypurine	C5H5N5O	charge=0; abundance=89.09094968832602
C00244	Nitrate	Nitrate; Nitric acid	NO3	charge=-1; abundance=99.99999999601883
C00248	Lipoamide	Lipoamide; Thioctic acid amide; Thioctic acid amide (JAN)	C8H15NOS2	charge=0; abundance=99.99815089702405
C00249	Hexadecanoic acid	Hexadecanoic acid; Hexadecanoate; Hexadecylic acid; Palmitic acid; Palmitate; Cetylic acid	C16H31O2	charge=-1; abundance=99.99104674879143
C00251	Chorismate	Chorismate; Chorismic acid	C10H8O6	charge=-2; abundance=99.99656506694605
C00253	Nicotinate	Nicotinate; Nicotinic acid; Niacin; 3-Pyridinecarboxylic acid; Nicotinic acid (JP14); Niacor (TN)	C6H4NO2	charge=-1; abundance=99.99843956981037
C00254	Prephenate	Prephenate; Prephenic acid	C10H8O6	charge=-2; abundance=99.99924651932456
C00255	Riboflavin	Riboflavin; Lactoflavin; 7,8-Dimethyl-10-ribitylisoalloxazine; Vitamin B2; Riboflavin (JP14/USP)	C17H19N4O6	charge=-1; abundance=99.0616005040665
C00256	(R)-Lactate	(R)-Lactate; D-Lactate; D-Lactic acid; D-2-Hydroxypropanoic acid; D-2-Hydroxypropionic acid	C3H5O3	charge=-1; abundance=99.99913552003515
C00257	D-Gluconic acid	D-Gluconic acid; D-Gluconate; D-Gluco-hexonic acid	C6H11O7	charge=-1; abundance=99.97427507406573
C00258	D-Glycerate	D-Glycerate; Glycerate; (R)-Glycerate; Glyceric acid	C3H5O4	charge=-1; abundance=99.9965413160959
C00262	Hypoxanthine	Hypoxanthine; Purine-6-ol	C5H3N4O	charge=-1; abundance=51.33579711520456
C00263	L-Homoserine	L-Homoserine; 2-Amino-4-hydroxybutyric acid	C4H9NO3	charge=0; abundance=59.057372567568244
C00264	3-Oxoacyl-CoA	3-Oxoacyl-CoA	C24H37N7O18P3RS
C00266	Glycolaldehyde	Glycolaldehyde; Hydroxyacetaldehyde	C2H4O2	charge=0; abundance=99.99941433401344
C00267	alpha-D-Glucose	alpha-D-Glucose	C6H12O6	charge=0; abundance=99.49903603236149
C00269	CDPdiacylglycerol	CDPdiacylglycerol; CDP-1,2-diacylglycerol	C14H19N3O15P2R2
C00275	D-Mannose 6-phosphate	D-Mannose 6-phosphate	C6H11O9P	charge=-2; abundance=99.32320544530094
C00282	Hydrogen	Hydrogen; H2	H2
C00283	Hydrogen sulfide	Hydrogen sulfide; Hydrogen-sulfide; H2S	HS	charge=-1; abundance=49.76981220343899
C00286	dGTP	dGTP; 2'-Deoxyguanosine 5'-triphosphate; Deoxyguanosine 5'-triphosphate; Deoxyguanosine triphosphate	C10H12N5O13P3	charge=-4; abundance=91.21503800542658
C00288	HCO3-	HCO3-; Bicarbonate; Hydrogencarbonate; Acid carbonate	CHO3	charge=-1; abundance=48.82235202525624
C00294	Inosine	Inosine; Inosine (JAN)	C10H11N4O5	charge=-1; abundance=53.77700065972061
C00295	Orotate	Orotate; Orotic acid; Uracil-6-carboxylic acid; Orotic acid (JAN)	C5H3N2O4	charge=-1; abundance=83.98851452547584
C00299	Uridine	Uridine	C9H12N2O6	charge=0; abundance=83.38655399854913
C00300	Creatine	Creatine; alpha-Methylguanidino acetic acid; Methylglycocyamine	C4H9N3O2	charge=0; abundance=99.96252327168565
C00301	ADPribose	ADPribose	C15H21N5O14P2	charge=-2; abundance=99.47973534329665
C00305	Magnesium	Magnesium; Mg2+	Mg	charge=2; abundance=100.0
C00311	Isocitrate	Isocitrate; Isocitric acid; 1-Hydroxytricarballylic acid; 1-Hydroxypropane-1,2,3-tricarboxylic acid	C6H5O7	charge=-3; abundance=99.98501820511463
C00320	Thiosulfate	Thiosulfate; Hyposulfite	HO3S2	charge=-1; abundance=99.99999999947356
C00327	L-Citrulline	L-Citrulline; 2-Amino-5-ureidovaleric acid	C6H13N3O3	charge=0; abundance=62.6764594886609
C00328	L-Kynurenine	L-Kynurenine; 3-Anthraniloyl-L-alanine	C10H11N2O3	charge=-1; abundance=52.04240722346269
C00330	Deoxyguanosine	Deoxyguanosine; 2'-Deoxyguanosine	C10H13N5O4	charge=0; abundance=93.50836199477153
C00332	Acetoacetyl-CoA	Acetoacetyl-CoA; Acetoacetyl coenzyme A; 3-Acetoacetyl-CoA	C25H36N7O18P3S	charge=-4; abundance=95.64612170253115
C00334	4-Aminobutanoate	4-Aminobutanoate; 4-Aminobutanoic acid; 4-Aminobutyrate; 4-Aminobutyric acid; gamma-Aminobutyric acid; 4-Aminobutylate; gamma-Aminobutyric acid (JAN)	C4H9NO2	charge=0; abundance=94.25423423697956
C00337	(S)-Dihydroorotate	(S)-Dihydroorotate; (S)-4,5-Dihydroorotate; L-Dihydroorotate; L-Dihydroorotic acid; Dihydro-L-orotic acid	C5H4N2O4	charge=-2; abundance=64.12278611523932
C00341	Geranyl diphosphate	Geranyl diphosphate	C10H17O7P2	charge=-3; abundance=97.53229928898298
C00342	Thioredoxin	Thioredoxin; Reduced thioredoxin	XH2
C00343	Oxidized thioredoxin	Oxidized thioredoxin; Thioredoxin disulfide; Thioredoxin sulfide	X
C00345	6-Phospho-D-gluconate	6-Phospho-D-gluconate	C6H10O10P	charge=-3; abundance=99.57118906919
C00350	Phosphatidylethanolamine	Phosphatidylethanolamine; (3-Phosphatidyl)ethanolamine; (3-Phosphatidyl)-ethanolamine; Cephalin	C7H12NO8PR2
C00352	D-Glucosamine 6-phosphate	D-Glucosamine 6-phosphate; D-Glucosamine phosphate	C6H12NO8P	charge=-2; abundance=84.62777900281215
C00353	Geranylgeranyl diphosphate	Geranylgeranyl diphosphate; Geranylgeranyl pyrophosphate; all-trans-Geranylgeranyl diphosphate; all-trans-Geranylgeranyl pyrophosphate	C20H33O7P2	charge=-3; abundance=97.53229928898298
C00354	D-Fructose 1,6-bisphosphate	D-Fructose 1,6-bisphosphate	C6H10O12P2	charge=-4; abundance=94.85014720216301
C00356	(S)-3-Hydroxy-3-methylglutaryl-CoA	(S)-3-Hydroxy-3-methylglutaryl-CoA; Hydroxymethylglutaryl-CoA; Hydroxymethylglutaroyl coenzyme A; HMG-CoA; 3-Hydroxy-3-methylglutaryl-CoA	C27H39N7O20P3S	charge=-5; abundance=99.90697621240156
C00357	N-Acetyl-D-glucosamine 6-phosphate	N-Acetyl-D-glucosamine 6-phosphate	C8H14NO9P	charge=-2; abundance=99.61408117132778
C00360	dAMP	dAMP; 2'-Deoxyadenosine 5'-phosphate; 2'-Deoxyadenosine 5'-monophosphate; Deoxyadenylic acid; Deoxyadenosine monophosphate	C10H12N5O6P	charge=-2; abundance=99.80448331288906
C00361	dGDP	dGDP; 2'-Deoxyguanosine 5'-diphosphate	C10H12N5O10P2	charge=-3; abundance=91.20025116201693
C00362	dGMP	dGMP; 2'-Deoxyguanosine 5'-monophosphate; 2'-Deoxyguanosine 5'-phosphate; Deoxyguanylic acid; Deoxyguanosine monophosphate	C10H12N5O7P	charge=-2; abundance=93.33977924471823
C00363	dTDP	dTDP; Deoxythymidine 5'-diphosphate	C10H13N2O11P2	charge=-3; abundance=87.89950097232087
C00364	dTMP	dTMP; Thymidine 5'-phosphate; Deoxythymidine 5'-phosphate; Thymidylic acid; 5'-Thymidylic acid; Thymidine monophosphate; Deoxythymidylic acid; Thymidylate	C10H13N2O8P	charge=-2; abundance=89.96130107960589
C00365	dUMP	dUMP; Deoxyuridylic acid; Deoxyuridine monophosphate; Deoxyuridine 5'-phosphate; 2'-Deoxyuridine 5'-phosphate	C9H11N2O8P	charge=-2; abundance=83.39717380684036
C00376	Retinal	Retinal; Vitamin A aldehyde; Retinene; all-trans-Retinal; all-trans-Vitamin A aldehyde; all-trans-Retinene	C20H28O	charge=0; abundance=99.99999999999132
C00378	Thiamin	Thiamin; Thiamine; Vitamin B1; Aneurin; Antiberiberi factor	C12H17N4OS	charge=1; abundance=99.96550209953976
C00380	Cytosine	Cytosine	C4H5N3O	charge=0; abundance=90.60947000131632
C00385	Xanthine	Xanthine	C5H3N4O2	charge=-1; abundance=96.54408898472224
C00387	Guanosine	Guanosine	C10H13N5O5	charge=0; abundance=93.46702027835309
C00407	L-Isoleucine	L-Isoleucine; 2-Amino-3-methylvaleric acid; L-Isoleucine (JP14/USP)	C6H13NO2	charge=0; abundance=79.6011428714659
C00415	Dihydrofolate	Dihydrofolate; Dihydrofolic acid; 7,8-Dihydrofolate; 7,8-Dihydrofolic acid	C19H19N7O6	charge=-2; abundance=98.82486768099939
C00417	cis-Aconitate	cis-Aconitate; cis-Aconitic acid	C6H3O6	charge=-3; abundance=99.96552529864265
C00418	(R)-Mevalonate	(R)-Mevalonate; Mevalonic acid; 3,5-Dihydroxy-3-methylvaleric acid	C6H11O4	charge=-1; abundance=99.99746308679877
C00430	5-Aminolevulinate	5-Aminolevulinate; 5-Amino-4-oxopentanoate; 5-Amino-4-oxovaleric acid	C5H8NO3	charge=-1; abundance=93.59557241251603
C00437	N-Acetylornithine	N-Acetylornithine; N2-Acetyl-L-ornithine	C7H14N2O3	charge=0; abundance=88.91281465346249
C00438	N-Carbamoyl-L-aspartate	N-Carbamoyl-L-aspartate	C5H6N2O5	charge=-2; abundance=99.98212813470211
C00441	L-Aspartate 4-semialdehyde	L-Aspartate 4-semialdehyde; Aspartate beta-semialdehyde; L-Aspartic 4-semialdehyde	C4H6NO3	charge=-1; abundance=50.89868721539394
C00445	5,10-Methenyltetrahydrofolate	5,10-Methenyltetrahydrofolate	C20H20N7O6	charge=-1; abundance=97.04594963505129
C00446	alpha-D-Galactose 1-phosphate	alpha-D-Galactose 1-phosphate; alpha-D-Galactopyranose 1-phosphate	C6H11O9P	charge=-2; abundance=99.7746229813164
C00448	trans,trans-Farnesyl diphosphate	trans,trans-Farnesyl diphosphate; Farnesyl diphosphate; Farnesyl pyrophosphate; 2-trans,6-trans-Farnesyl diphosphate	C15H25O7P2	charge=-3; abundance=97.53229928898298
C00455	Nicotinamide D-ribonucleotide	Nicotinamide D-ribonucleotide; NMN; Nicotinamide mononucleotide; Nicotinamide ribonucleotide; Nicotinamide nucleotide; beta-Nicotinamide D-ribonucleotide; beta-Nicotinamide ribonucleotide; beta-Nicotinamide mononucleotide	C11H14N2O8P	charge=-1; abundance=99.42268669225554
C00458	dCTP	dCTP; Deoxycytidine 5'-triphosphate; Deoxycytidine triphosphate; 2'-Deoxycytidine 5'-triphosphate	C9H12N3O13P3	charge=-4; abundance=97.54604195731767
C00459	dTTP	dTTP; Deoxythymidine triphosphate; Deoxythymidine 5'-triphosphate; TTP	C10H13N2O14P3	charge=-4; abundance=87.91375239198373
C00460	dUTP	dUTP; 2'-Deoxyuridine 5'-triphosphate	C9H11N2O14P3	charge=-4; abundance=81.4990267506955
C00463	Indole	Indole; 2,3-Benzopyrrole	C8H7N	charge=0; abundance=99.99999634436409
C00469	Ethanol	Ethanol; Ethyl alcohol; Methylcarbinol; Dehydrated ethanol; Dehydrated ethanol (JP14/USP); Ethanol (JP14); Alcohol (TN)	C2H6O	charge=0; abundance=99.99999661635542
C00475	Cytidine	Cytidine	C9H13N3O5	charge=0; abundance=99.97202537109226
C00483	Tyramine	Tyramine; 2-(p-Hydroxyphenyl)ethylamine	C8H12NO	charge=1; abundance=81.59656297728569
C00488	Formamide	Formamide; Methanamide	CH3NO	charge=0; abundance=99.99979327339716
C00491	L-Cystine	L-Cystine; L-Dicysteine; L-alpha-Diamino-beta-dithiolactic acid	C6H12N2O4S2	charge=0; abundance=27.320844978357115
C00493	Shikimate	Shikimate; Shikimic acid; 3,4,5-Trihydroxy-1-cyclohexenecarboxylic acid	C7H9O5	charge=-1; abundance=99.98926307799721
C00504	Folate	Folate; Pteroylglutamic acid; Folic acid (JP14/USP); Folic acid (TN); Folicet (TN)	C19H17N7O6	charge=-2; abundance=90.74887817413659
C00506	L-Cysteate	L-Cysteate; L-Cysteic acid; 3-Sulfoalanine; 2-Amino-3-sulfopropionic acid	C3H5NO5S	charge=-2; abundance=61.677835307565054
C00522	(R)-Pantoate	(R)-Pantoate; Pantoate; Pantoic acid	C6H11O4	charge=-1; abundance=99.99733268339523
C00526	Deoxyuridine	Deoxyuridine; 2-Deoxyuridine; 2'-Deoxyuridine	C9H12N2O5	charge=0; abundance=83.54821796042577
C00533	Nitric oxide	Nitric oxide; NO; Nitrogen monoxide; INOmax (TN)	NO	charge=0; abundance=100.0
C00536	Triphosphate	Triphosphate; Tripolyphosphate	O10P3	charge=-5; abundance=95.09353886596163
C00542	Cystathionine	Cystathionine	C7H14N2O4S	charge=0; abundance=44.206862095158606
C00546	Methylglyoxal	Methylglyoxal; Pyruvaldehyde; Pyruvic aldehyde; 2-Ketopropionaldehyde; 2-Oxopropanal	C3H4O2	charge=0; abundance=99.99999584986605
C00559	Deoxyadenosine	Deoxyadenosine; 2'-Deoxyadenosine	C10H13N5O3	charge=0; abundance=99.9849126632637
C00566	(3S)-Citryl-CoA	(3S)-Citryl-CoA	C27H36N7O22P3S	charge=-6; abundance=99.89306136157671
C00568	4-Aminobenzoate	4-Aminobenzoate; ABEE; 4-Aminobenzoic acid; p-Aminobenzoate	C7H6NO2	charge=-1; abundance=99.99411334677382
C00575	3',5'-Cyclic AMP	3',5'-Cyclic AMP; Cyclic adenylic acid; Cyclic AMP; Adenosine 3',5'-phosphate; cAMP	C10H11N5O6P	charge=-1; abundance=99.96091805680997
C00577	D-Glyceraldehyde	D-Glyceraldehyde	C3H6O3	charge=0; abundance=99.98430133112754
C00579	Dihydrolipoamide	Dihydrolipoamide; Dihydrothioctamide	C8H17NOS2	charge=0; abundance=86.43009363982416
C00601	Phenylacetaldehyde	Phenylacetaldehyde; alpha-Tolualdehyde	C8H8O	charge=0; abundance=99.99989590496487
C00617	UDP-D-galacturonate	UDP-D-galacturonate; UDPgalacturonate	C15H19N2O18P2	charge=-3; abundance=83.35312061177272
C00620	D-Ribose 1-phosphate	D-Ribose 1-phosphate	C5H9O8P	charge=-2; abundance=99.78332373878615
C00623	Glycerol 1-phosphate	Glycerol 1-phosphate; sn-Glycerol 1-phosphate	C3H7O6P	charge=-2; abundance=99.6573505116807
C00624	N-Acetyl-L-glutamate	N-Acetyl-L-glutamate; N-Acetyl-L-glutamic acid	C7H9NO5	charge=-2; abundance=99.99637065702142
C00630	2-Methylpropanoyl-CoA	2-Methylpropanoyl-CoA; 2-Methylpropionyl-CoA; Isobutyryl-CoA	C25H38N7O17P3S	charge=-4; abundance=99.88369291831165
C00631	2-Phospho-D-glycerate	2-Phospho-D-glycerate; D-Glycerate 2-phosphate	C3H4O7P	charge=-3; abundance=99.89913359343288
C00636	D-Mannose 1-phosphate	D-Mannose 1-phosphate	C6H11O9P	charge=-2; abundance=99.7746229813164
C00640	(3S)-3-Hydroxyacyl-CoA	(3S)-3-Hydroxyacyl-CoA; (S)-3-Hydroxyacyl-CoA	C24H39N7O18P3RS
C00655	Xanthosine 5'-phosphate	Xanthosine 5'-phosphate; Xanthylic acid; XMP; (9-D-Ribosylxanthine)-5'-phosphate	C10H10N4O9P	charge=-3; abundance=95.97584257211827
C00658	trans-2,3-Dehydroacyl-CoA	trans-2,3-Dehydroacyl-CoA	C24H37N7O17P3RS
C00665	D-Fructose 2,6-bisphosphate	D-Fructose 2,6-bisphosphate	C6H10O12P2	charge=-4; abundance=99.66534954292825
C00666	LL-2,6-Diaminoheptanedioate	LL-2,6-Diaminoheptanedioate; LL-2,6-Diaminopimelate; LL-2,6-Diaminopimelic acid	C7H14N2O4	charge=0; abundance=59.39439829418878
C00668	alpha-D-Glucose 6-phosphate	alpha-D-Glucose 6-phosphate	C6H11O9P	charge=-2; abundance=99.32320544530094
C00672	2-Deoxy-D-ribose 1-phosphate	2-Deoxy-D-ribose 1-phosphate	C5H9O7P	charge=-2; abundance=99.73276474501554
C00673	2-Deoxy-D-ribose 5-phosphate	2-Deoxy-D-ribose 5-phosphate	C5H9O7P	charge=-2; abundance=99.7769249736421
C00680	meso-2,6-Diaminoheptanedioate	meso-2,6-Diaminoheptanedioate; meso-2,6-Diaminopimelate; meso-2,6-Diaminopimelic acid; meso-Diaminoheptanedioate	C7H14N2O4	charge=0; abundance=59.39439829418878
C00683	(S)-2-Methyl-3-oxopropanoyl-CoA	(S)-2-Methyl-3-oxopropanoyl-CoA; (S)-2-Methyl-3-oxopropionyl-CoA; (S)-Methylmalonyl-CoA; (S)-Methylmalonyl-coenzyme A; (S)-3-oxo-2-methylpropanoyl-CoA	C25H35N7O19P3S	charge=-5; abundance=99.90766209658459
C00689	alpha,alpha'-Trehalose 6-phosphate	alpha,alpha'-Trehalose 6-phosphate; Trehalose 6-phosphate	C12H21O14P	charge=-2; abundance=99.69967580563808
C00698	Cl-	Cl-	Cl	charge=-1; abundance=100.0
C00704	O2.-	O2.-; Superoxide anion; O2-	O2
C00705	dCDP	dCDP; 2'-Deoxycytidine diphosphate; 2'-Deoxycytidine 5'-diphosphate	C9H12N3O10P2	charge=-3; abundance=97.53022907773625
C00719	Betaine	Betaine; Trimethylaminoacetate; Glycine betaine	C5H11NO2	charge=0; abundance=99.99998182126323
C00725	Lipoate	Lipoate; Lipoic acid; alpha-Lipoic acid; Thioctic acid	C8H13O2S2	charge=-1; abundance=99.99666225136602
C00748	Siroheme	Siroheme	C42H36FeN4O16	charge=-8; abundance=99.99503657316238
C00751	Squalene	Squalene; Spinacene; Supraene	C30H50	charge=0; abundance=100.0
C00787	tRNA(Tyr)	tRNA(Tyr)	OHR
C00791	Creatinine	Creatinine; 1-Methylglycocyamidine	C4H7N3O	charge=0; abundance=99.82672935959982
C00826	L-Arogenate	L-Arogenate; L-Arogenic acid; Pretyrosine	C10H12NO5	charge=-1; abundance=76.04337592650755
C00828	Menaquinone	Menaquinone; Menatetrenone; Menatetrenone (JP14); Vitamin K2 (TN)	C51H72O2	charge=0; abundance=100.0
C00842	dTDPglucose	dTDPglucose; dTDP-D-glucose	C16H24N2O16P2	charge=-2; abundance=90.06868220578552
C00857	Deamino-NAD+	Deamino-NAD+; Deamido-NAD+; Deamido-NAD	C21H24N6O15P2	charge=-2; abundance=99.78592105353609
C00860	L-Histidinol	L-Histidinol	C6H12N3O	charge=1; abundance=62.04688633397794
C00864	Pantothenate	Pantothenate; Pantothenic acid; (R)-Pantothenate	C9H16NO5	charge=-1; abundance=99.9771222481357
C00877	Crotonoyl-CoA	Crotonoyl-CoA; Crotonyl-CoA; 2-Butenoyl-CoA; trans-But-2-enoyl-CoA; But-2-enoyl-CoA	C25H36N7O17P3S	charge=-4; abundance=99.88369291831165
C00881	Deoxycytidine	Deoxycytidine; 2'-Deoxycytidine	C9H13N3O4	charge=0; abundance=99.99871536325743
C00882	Dephospho-CoA	Dephospho-CoA	C21H33N7O13P2S	charge=-2; abundance=92.12564396562003
C00885	Isochorismate	Isochorismate; Isochorismic acid	C10H8O6	charge=-2; abundance=99.99581864661147
C00886	L-Alanyl-tRNA	L-Alanyl-tRNA; L-Alanyl-tRNA(Ala)	C3H7NO2R
C00894	Propenoyl-CoA	Propenoyl-CoA; Acryloyl-CoA; Acrylyl-CoA	C24H34N7O17P3S	charge=-4; abundance=99.88369291831165
C00921	Dihydropteroate	Dihydropteroate; 7,8-Dihydropteroate	C14H13N6O3	charge=-1; abundance=98.81886618066105
C00931	Porphobilinogen	Porphobilinogen	C10H12N2O4	charge=-2; abundance=50.41359973195876
C00937	(R)-Lactaldehyde	(R)-Lactaldehyde; D-Lactaldehyde; D-2-Hydroxypropionaldehyde	C3H6O2	charge=0; abundance=99.99900214386705
C00944	3-Dehydroquinate	3-Dehydroquinate; 5-Dehydroquinate; 3-Dehydroquinic acid; 5-Dehydroquinic acid	C7H9O6	charge=-1; abundance=99.95611226970665
C00954	Indole-3-acetate	Indole-3-acetate; Indole-3-acetic acid; Indoleacetate; Indoleacetic acid	C10H8NO2	charge=-1; abundance=99.99540334527224
C00966	2-Dehydropantoate	2-Dehydropantoate	C6H9O4	charge=-1; abundance=99.99971957435416
C00979	O-Acetyl-L-serine	O-Acetyl-L-serine; O3-Acetyl-L-serine	C5H8NO4	charge=-1; abundance=71.37769340084257
C00988	2-Phosphoglycolate	2-Phosphoglycolate; Phosphoglycolic acid	C2H2O6P	charge=-3; abundance=99.76718169727343
C01005	O-Phospho-L-serine	O-Phospho-L-serine; L-O-Phosphoserine; 3-Phosphoserine	C3H5NO6P	charge=-3; abundance=69.20631486823629
C01024	Hydroxymethylbilane	Hydroxymethylbilane	C40H38N4O17	charge=-8; abundance=99.98561090922182
C01033	2-Methylbutanoyl-CoA	2-Methylbutanoyl-CoA; 2-Methylbutyryl-CoA	C26H40N7O17P3S	charge=-4; abundance=99.88369291831165
C01035	4-Guanidinobutanoate	4-Guanidinobutanoate	C5H11N3O2	charge=0; abundance=99.96917313794604
C01043	N-Carbamoylsarcosine	N-Carbamoylsarcosine	C4H7N2O3	charge=-1; abundance=99.9997678946115
C01051	Uroporphyrinogen III	Uroporphyrinogen III	C40H36N4O16	charge=-8; abundance=99.98677937306974
C01077	O-Acetyl-L-homoserine	O-Acetyl-L-homoserine	C6H11NO4	charge=0; abundance=74.17375192462042
C01079	Protoporphyrinogen IX	Protoporphyrinogen IX	C34H38N4O4	charge=-2; abundance=99.99532075396814
C01081	Thiamin monophosphate	Thiamin monophosphate; Thiamine monophosphate; Thiamin phosphate; Thiamine phosphate; TMP	C12H16N4O4PS	charge=-1; abundance=99.48654213929268
C01083	alpha,alpha-Trehalose	alpha,alpha-Trehalose; alpha,alpha'-Trehalose; Trehalose	C12H22O11	charge=0; abundance=99.87591292155435
C01086	(3R)-3-Hydroxyacyl-CoA	(3R)-3-Hydroxyacyl-CoA; (R)-3-Hydroxyacyl-CoA	C24H39N7O18P3RS
C01094	D-Fructose 1-phosphate	D-Fructose 1-phosphate	C6H11O9P	charge=-2; abundance=95.0174945936348
C01100	L-Histidinol phosphate	L-Histidinol phosphate	C6H10N3O4P	charge=-2; abundance=54.33450470259591
C01102	O-Phospho-L-homoserine	O-Phospho-L-homoserine	C4H8NO6P	charge=-2; abundance=73.66949703707904
C01103	Orotidine 5'-phosphate	Orotidine 5'-phosphate; Orotidylic acid	C10H10N2O11P	charge=-3; abundance=82.60275027460574
C01107	(R)-5-Phosphomevalonate	(R)-5-Phosphomevalonate; (R)-5-Phosphomevaloonic acid; (R)-Mevalonic acid 5-phosphate	C6H10O7P	charge=-3; abundance=99.29052437766029
C01118	O-Succinyl-L-homoserine	O-Succinyl-L-homoserine	C8H12NO6	charge=-1; abundance=74.17284703837477
C01122	cis-2,3-Dehydroacyl-CoA	cis-2,3-Dehydroacyl-CoA	C24H37N7O17P3RS
C01134	Pantetheine 4'-phosphate	Pantetheine 4'-phosphate; 4'-Phosphopantetheine; Phosphopantetheine	C11H21N2O7PS	charge=-2; abundance=91.5597216012558
C01144	(S)-3-Hydroxybutanoyl-CoA	(S)-3-Hydroxybutanoyl-CoA; (S)-3-Hydroxybutyryl-CoA	C25H38N7O18P3S	charge=-4; abundance=99.88369291831165
C01151	D-Ribose 1,5-bisphosphate	D-Ribose 1,5-bisphosphate; Ribose 1,5-bisphosphate	C5H8O11P2	charge=-4; abundance=99.6070233733839
C01165	L-Glutamate 5-semialdehyde	L-Glutamate 5-semialdehyde; L-Glutamate gamma-semialdehyde	C5H9NO3	charge=0; abundance=76.55549092984393
C01172	beta-D-Glucose 6-phosphate	beta-D-Glucose 6-phosphate	C6H11O9P	charge=-2; abundance=99.32320544530094
C01179	3-(4-Hydroxyphenyl)pyruvate	3-(4-Hydroxyphenyl)pyruvate; 4-Hydroxyphenylpyruvate; p-Hydroxyphenylpyruvic acid	C9H7O4	charge=-1; abundance=75.92639304130105
C01182	D-Ribulose 1,5-bisphosphate	D-Ribulose 1,5-bisphosphate	C5H8O11P2	charge=-4; abundance=99.43256445855214
C01185	Nicotinate D-ribonucleotide	Nicotinate D-ribonucleotide; beta-Nicotinate D-ribonucleotide; Nicotinate ribonucleotide; Nicotinic acid ribonucleotide	C11H12NO9P	charge=-2; abundance=99.63836420207551
C01213	(R)-2-Methyl-3-oxopropanoyl-CoA	(R)-2-Methyl-3-oxopropanoyl-CoA; (R)-2-Methyl-3-oxopropionyl-CoA; (R)-3-Oxo-2-methylpropanoyl-CoA; (R)-Methylmalonyl-CoA	C25H35N7O19P3S	charge=-5; abundance=99.90766209658459
C01230	all-trans-Hexaprenyl diphosphate	all-trans-Hexaprenyl diphosphate	C30H49O7P2	charge=-3; abundance=97.53229928898298
C01242	S-Aminomethyldihydrolipoylprotein	S-Aminomethyldihydrolipoylprotein	CH5NX
C01250	N-Acetyl-L-glutamate 5-semialdehyde	N-Acetyl-L-glutamate 5-semialdehyde; 2-Acetamido-5-oxopentanoate	C7H10NO4	charge=-1; abundance=99.99662827131836
C01251	2-Hydroxybutane-1,2,4-tricarboxylate	2-Hydroxybutane-1,2,4-tricarboxylate; Homocitrate; Homocitric acid; 3-Hydroxy-3-carboxyadipic acid; (R)-2-Hydroxy-1,2,4-butanetricarboxylic acid	C7H7O7	charge=-3; abundance=99.98120297508419
C01267	3-(Imidazol-4-yl)-2-oxopropyl phosphate	3-(Imidazol-4-yl)-2-oxopropyl phosphate; Imidazole-acetol phosphate	C6H7N2O5P	charge=-2; abundance=99.49031786476039
C01268	5-Amino-6-(5'-phosphoribosylamino)uracil	5-Amino-6-(5'-phosphoribosylamino)uracil; 5-Amino-6-(ribosylamino)-2,4-(1H,3H)-pyrimidinedione 5'-phosphate; 5-Amino-6-(5-phosphoribosylamino)uracil	C9H13N4O9P	charge=-2; abundance=71.54520149112753
C01269	5-O-(1-Carboxyvinyl)-3-phosphoshikimate	5-O-(1-Carboxyvinyl)-3-phosphoshikimate; O5-(1-Carboxyvinyl)-3-phosphoshikimate	C10H9O10P	charge=-4; abundance=99.67729927068271
C01279	4-Amino-5-hydroxymethyl-2-methylpyrimidine	4-Amino-5-hydroxymethyl-2-methylpyrimidine; Toxopyrimidine; 4-Amino-2-methyl-5-pyrimidinemethanol	C6H9N3O	charge=0; abundance=99.85127605308442
C01300	2-Amino-4-hydroxy-6-hydroxymethyl-7,8-dihydropteridine	2-Amino-4-hydroxy-6-hydroxymethyl-7,8-dihydropteridine	C7H9N5O2	charge=0; abundance=97.20407922336553
C01302	1-(2-Carboxyphenylamino)-1'-deoxy-D-ribulose 5'-phosphate	1-(2-Carboxyphenylamino)-1'-deoxy-D-ribulose 5'-phosphate	C12H13NO9P	charge=-3; abundance=99.52441299102684
C01304	2,5-Diamino-6-hydroxy-4-(5'-phosphoribosylamino)-pyrimidine	2,5-Diamino-6-hydroxy-4-(5'-phosphoribosylamino)-pyrimidine	C9H14N5O8P	charge=-2; abundance=99.05501235431677
C01330	Sodium	Sodium; Na+	Na	charge=1; abundance=100.0
C01344	dIDP	dIDP; 2'-Deoxyinosine-5'-diphosphate; 2'-Deoxyinosine 5'-diphosphate	C10H10N4O10P2	charge=-4; abundance=52.42775379056939
C01345	dITP	dITP; 2'-Deoxyinosine-5'-triphosphate; 2'-Deoxyinosine 5'-triphosphate	C10H10N4O13P3	charge=-5; abundance=52.43625404171043
C01346	dUDP	dUDP; 2'-Deoxyuridine 5'-diphosphate	C9H11N2O11P2	charge=-3; abundance=81.48581520186632
C01352	FADH2	FADH2	C27H32N9O15P2	charge=-3; abundance=67.95556903495584
C01367	3'-AMP	3'-AMP; 3'-Adenylic acid; 3'-Adenosine monophosphate; Adenosine-3'-monophosphate; Adenosine 3'-phosphate; AMP 3'-phosphate	C10H12N5O7P	charge=-2; abundance=99.88299584397836
C01413	Cadmium	Cadmium	Cd	charge=2; abundance=100.0
C01563	Carbamate	Carbamate; Carbamic acid; Aminoformic acid	CH2NO2	charge=-1; abundance=99.99916942943612
C01598	Melatonin	Melatonin; N-Acetyl-5-methoxytryptamine	C13H16N2O2	charge=0; abundance=99.99802929548329
C01635	tRNA(Ala)	tRNA(Ala)	OHR
C01636	tRNA(Arg)	tRNA(Arg)	OHR
C01637	tRNA(Asn)	tRNA(Asn)	OHR
C01638	tRNA(Asp)	tRNA(Asp)	OHR
C01639	tRNA(Cys)	tRNA(Cys)	OHR
C01640	tRNA(Gln)	tRNA(Gln)	OHR
C01641	tRNA(Glu)	tRNA(Glu)	OHR
C01642	tRNA(Gly)	tRNA(Gly)	OHR
C01643	tRNA(His)	tRNA(His)	OHR
C01644	tRNA(Ile)	tRNA(Ile)	OHR
C01645	tRNA(Leu)	tRNA(Leu)	OHR
C01646	tRNA(Lys)	tRNA(Lys)	OHR
C01647	tRNA(Met)	tRNA(Met)	OHR
C01648	tRNA(Phe)	tRNA(Phe)	OHR
C01649	tRNA(Pro)	tRNA(Pro)	OHR
C01650	tRNA(Ser)	tRNA(Ser)	OHR
C01651	tRNA(Thr)	tRNA(Thr)	OHR
C01652	tRNA(Trp)	tRNA(Trp)	OHR
C01653	tRNA(Val)	tRNA(Val)	OHR
C01762	Xanthosine	Xanthosine	C10H11N4O6	charge=-1; abundance=96.14645013496924
C01801	Deoxyribose	Deoxyribose; 2-Deoxy-beta-D-erythro-pentose; Thyminose; 2-Deoxy-D-ribose	C5H10O4	charge=0; abundance=99.95646510127041
C01832	Lauroyl-CoA	Lauroyl-CoA; Lauroyl coenzyme A; Dodecanoyl-CoA	C33H54N7O17P3S	charge=-4; abundance=99.88369291831165
C01929	L-Histidinal	L-Histidinal	C6H9N3O	charge=0; abundance=96.86228923094501
C01931	L-Lysyl-tRNA	L-Lysyl-tRNA; L-Lysyl-tRNA(Lys)	C6H15N2O2R
C01944	Octanoyl-CoA	Octanoyl-CoA	C29H46N7O17P3S	charge=-4; abundance=99.88369291831165
C01962	Thiocysteine	Thiocysteine	C3H7NO2S2	charge=0; abundance=38.95223652325849
C02047	L-Leucyl-tRNA	L-Leucyl-tRNA; L-Leucyl-tRNA(Leu)	C6H13NO2R
C02051	Lipoylprotein	Lipoylprotein	X
C02094	beta-Carotene	beta-Carotene	C40H56	charge=0; abundance=100.0
C02097	dTDPgalactose	dTDPgalactose; dTDP-D-galactose	C16H24N2O16P2	charge=-2; abundance=90.06868220578552
C02163	L-Arginyl-tRNA(Arg)	L-Arginyl-tRNA(Arg); L-Arginyl-tRNA	C6H15N4O2R
C02191	Protoporphyrin	Protoporphyrin; Protoporphyrin IX; Porphyrinogen IX	C34H32N4O4	charge=-2; abundance=99.9908763058653
C02226	2-Methylmaleate	2-Methylmaleate; Citraconate; Citraconic acid; Methylmaleic acid	C5H4O4	charge=-2; abundance=99.9380727847623
C02291	L-Cystathionine	L-Cystathionine	C7H14N2O4S	charge=0; abundance=44.206862095158606
C02353	2',3'-Cyclic AMP	2',3'-Cyclic AMP	C10H11N5O6P	charge=-1; abundance=99.98643429052284
C02376	5-Methylcytosine	5-Methylcytosine	C5H7N3O	charge=0; abundance=94.50667209694718
C02406	Formylkynurenine	Formylkynurenine; N-Formylkynurenine	C11H12N2O4
C02412	Glycyl-tRNA(Gly)	Glycyl-tRNA(Gly)	C2H5NO2R
C02430	L-Methionyl-tRNA	L-Methionyl-tRNA; L-Methionyl-tRNA(Met)	C5H11NO2SR
C02463	Precorrin 2	Precorrin 2; Dihydrosirohydrochlorin	C42H40N4O16	charge=-8; abundance=99.9933394098566
C02504	2-Isopropylmalate	2-Isopropylmalate; 2-Isopropylmalic acid; 3-Carboxy-3-hydroxy-4-methylpentanoate; 3-Carboxy-3-hydroxy-isocaproate; 3-Carboxy-3-hydroxyisocaproate	C7H10O5	charge=-2; abundance=99.96133535904775
C02505	2-Phenylacetamide	2-Phenylacetamide	C8H9NO	charge=0; abundance=99.99998382165087
C02553	L-Seryl-tRNA(Ser)	L-Seryl-tRNA(Ser)	C3H6NO3R
C02554	L-Valyl-tRNA(Val)	L-Valyl-tRNA(Val)	C5H11NO2R
C02565	N-Methylhydantoin	N-Methylhydantoin; N-Methylimidazolidine-2,4-dione	C4H6N2O2	charge=0; abundance=89.71153525301509
C02593	Tetradecanoyl-CoA	Tetradecanoyl-CoA; Myristoyl-CoA	C35H58N7O17P3S	charge=-4; abundance=99.88369291831165
C02612	(R)-2-Methylmalate	(R)-2-Methylmalate; (R)-2-Methylmalic acid; (3R)-Citramalate; (3R)-Citramalic acid; (3R)-alpha-Hydroxypyrotartaric acid; D-Citramalate; D-Citramalic acid; D-alpha-Hydroxypyrotartaric acid	C5H6O5	charge=-2; abundance=99.97926406255932
C02631	2-Isopropylmaleate	2-Isopropylmaleate; beta-Isopropylmaleate	C7H8O4	charge=-2; abundance=99.88499733388282
C02637	3-Dehydroshikimate	3-Dehydroshikimate	C7H7O5	charge=-1; abundance=99.96153321067663
C02693	Indole-3-acetamide	Indole-3-acetamide	C10H10N2O	charge=0; abundance=99.99997963745734
C02702	L-Prolyl-tRNA(Pro)	L-Prolyl-tRNA(Pro)	C5H9NO2R
C02730	2-Succinylbenzoate	2-Succinylbenzoate; o-Succinylbenzoate; Succinylbenzoate	C11H8O5	charge=-2; abundance=99.99605628533503
C02737	Phosphatidylserine	Phosphatidylserine; Phosphatidyl-L-serine; 1,2-Diacyl-sn-glycerol 3-phospho-L-serine; 3-O-sn-Phosphatidyl-L-serine; O3-Phosphatidyl-L-serine	C8H12NO10PR2
C02739	Phosphoribosyl-ATP	Phosphoribosyl-ATP; N1-(5-Phospho-D-ribosyl)-ATP; 1-(5-Phosphoribosyl)-ATP	C15H19N5O20P4	charge=-6; abundance=97.34883421360821
C02741	Phosphoribosyl-AMP	Phosphoribosyl-AMP	C15H19N5O14P2	charge=-4; abundance=99.59175469654927
C02839	L-Tyrosyl-tRNA(Tyr)	L-Tyrosyl-tRNA(Tyr)	C9H11NO3R
C02939	3-Methylbutanoyl-CoA	3-Methylbutanoyl-CoA; Isovaleryl-CoA	C26H40N7O17P3S	charge=-4; abundance=99.88369291831165
C02972	Dihydrolipoylprotein	Dihydrolipoylprotein	H2X
C02984	L-Aspartyl-tRNA(Asp)	L-Aspartyl-tRNA(Asp)	C4H6NO4R
C02987	L-Glutamyl-tRNA(Glu)	L-Glutamyl-tRNA(Glu)	C5H8NO4R
C02988	L-Histidyl-tRNA(His)	L-Histidyl-tRNA(His)	C6H9N3O2R
C02992	L-Threonyl-tRNA(Thr)	L-Threonyl-tRNA(Thr)	C4H9NO3R
C03024	Reduced flavoprotein	Reduced flavoprotein	RH
C03069	3-Methylcrotonyl-CoA	3-Methylcrotonyl-CoA; 3-Methylbut-2-enoyl-CoA; 3-Methylcrotonoyl-CoA	C26H38N7O17P3S	charge=-4; abundance=99.88369291831165
C03078	4-Guanidinobutanamide	4-Guanidinobutanamide	C5H13N4O	charge=1; abundance=99.96889461024105
C03082	4-Phospho-L-aspartate	4-Phospho-L-aspartate; L-4-Aspartyl phosphate	C4H5NO7P	charge=-3; abundance=71.3293155214954
C03090	5-Phosphoribosylamine	5-Phosphoribosylamine; 5-Phospho-beta-D-ribosylamine; 5-Phospho-D-ribosylamine; 5-Phosphoribosyl-1-amine	C5H10NO7P	charge=-2; abundance=90.83477659999757
C03114	Dimethylbenzimidazole	Dimethylbenzimidazole; 5,6-Dimethylbenzimidazole	C9H10N2	charge=0; abundance=99.71566770303978
C03125	L-Cysteinyl-tRNA(Cys)	L-Cysteinyl-tRNA(Cys)	C3H7NO2SR
C03127	L-Isoleucyl-tRNA(Ile)	L-Isoleucyl-tRNA(Ile)	C6H13NO2R
C03160	2-Succinylbenzoyl-CoA	2-Succinylbenzoyl-CoA; O-Succinylbenzoyl-CoA; Succinylbenzoyl-CoA	C32H39N7O20P3S	charge=-5; abundance=99.90702452599223
C03161	Oxidized flavoprotein	Oxidized flavoprotein	R
C03175	Shikimate 3-phosphate	Shikimate 3-phosphate; Shikimate 5-phosphate	C7H8O8P	charge=-3; abundance=99.71062816084711
C03221	2-trans-Dodecenoyl-CoA	2-trans-Dodecenoyl-CoA; trans-Dodec-2-enoyl-CoA	C33H52N7O17P3S	charge=-4; abundance=99.88369291831165
C03231	3-Methylglutaconyl-CoA	3-Methylglutaconyl-CoA; trans-3-Methylglutaconyl-CoA	C27H37N7O19P3S	charge=-5; abundance=99.90589690345436
C03232	3-Phosphonooxypyruvate	3-Phosphonooxypyruvate; 3-Phosphonooxypyruvic acid; 3-Phosphohydroxypyruvate; 3-Phosphohydroxypyruvic acid	C3H2O7P	charge=-3; abundance=99.84012985031399
C03263	Coproporphyrinogen III	Coproporphyrinogen III	C36H40N4O8	charge=-4; abundance=99.98973732396865
C03287	L-Glutamyl 5-phosphate	L-Glutamyl 5-phosphate; L-Glutamate 5-phosphate	C5H8NO7P	charge=-2; abundance=76.24464744621727
C03340	L-2,3-Dihydrodipicolinate	L-2,3-Dihydrodipicolinate; Dihydrodipicolinic acid; Dihydrodipicolinate; 2,3-Dihydrodipicolinate	C7H5NO4	charge=-2; abundance=99.99917118181237
C03344	2-Methylacetoacetyl-CoA	2-Methylacetoacetyl-CoA; 2-Methyl-3-acetoacetyl-CoA	C26H38N7O18P3S	charge=-4; abundance=99.78301245109247
C03345	2-Methylbut-2-enoyl-CoA	2-Methylbut-2-enoyl-CoA; trans-2-Methylbut-2-enoyl-CoA; Tiglyl-CoA; (E)-2-Methylcrotonoyl-CoA; Methylcrotonoyl-CoA; Methylcrotonyl-CoA; Tigloyl-CoA	C26H38N7O17P3S	charge=-4; abundance=99.88369291831165
C03373	Aminoimidazole ribotide	Aminoimidazole ribotide; AIR; 1-(5'-Phosphoribosyl)-5-aminoimidazole; 5'-Phosphoribosyl-5-aminoimidazole; 1-(5-Phospho-D-ribosyl)-5-aminoimidazole; 5-Amino-1-(5-phospho-D-ribosyl)imidazole	C8H12N3O7P	charge=-2; abundance=92.30856354744365
C03406	N-(L-Arginino)succinate	N-(L-Arginino)succinate; N(omega)-(L-Arginino)succinate; L-Argininosuccinate; L-Argininosuccinic acid; L-Arginosuccinic acid	C10H17N4O6	charge=-1; abundance=57.48462468455124
C03427	Prephytoene diphosphate	Prephytoene diphosphate	C40H65O7P2	charge=-3; abundance=97.53045604776946
C03428	Presqualene diphosphate	Presqualene diphosphate	C30H49O7P2	charge=-3; abundance=97.53045604776946
C03451	(R)-S-Lactoylglutathione	(R)-S-Lactoylglutathione	C13H20N3O8S	charge=-1; abundance=67.22275366340101
C03460	2-Methylprop-2-enoyl-CoA	2-Methylprop-2-enoyl-CoA; Methacrylyl-CoA; Methylacrylyl-CoA	C25H36N7O17P3S	charge=-4; abundance=99.88369291831165
C03465	3-Methyl-2-oxopentanoate	3-Methyl-2-oxopentanoate; 2-Oxo-3-methylvalerate	C6H9O3	charge=-1; abundance=99.99966973503336
C03479	5-Formyltetrahydrofolate	5-Formyltetrahydrofolate; L(-)-5-Formyl-5,6,7,8-tetrahydrofolic acid; Folinic acid	C20H21N7O7	charge=-2; abundance=99.19159306191479
C03492	D-4'-Phosphopantothenate	D-4'-Phosphopantothenate; (R)-4'-Phosphopantothenate	C9H15NO8P	charge=-3; abundance=99.32437382561368
C03496	Deoxy-ribose 1-phosphate	Deoxy-ribose 1-phosphate	C5H11O7P
C03506	Indoleglycerol phosphate	Indoleglycerol phosphate; 1-(Indol-3-yl)glycerol 3-phosphate; (3-Indolyl)-glycerol phosphate; C1-(3-Indolyl)-glycerol 3-phosphate	C11H12NO6P	charge=-2; abundance=99.66779367670539
C03511	L-Phenylalanyl-tRNA(Phe)	L-Phenylalanyl-tRNA(Phe)	C9H11NO2R
C03512	L-Tryptophanyl-tRNA(Trp)	L-Tryptophanyl-tRNA(Trp)	C11H12N2O2R
C03516	Magnesium protoporphyrin	Magnesium protoporphyrin; Magnesium protoporphyrin IX; Mg-protoporphyrin IX	C34H30MgN4O4	charge=-2; abundance=99.9975315844856
C03657	1,4-Dihydroxy-2-naphthoate	1,4-Dihydroxy-2-naphthoate	C11H7O4	charge=-1; abundance=81.52844900780512
C03684	6-Pyruvoyltetrahydropterin	6-Pyruvoyltetrahydropterin; 6-(1,2-Dioxopropyl)-5,6,7,8-tetrahydropterin; 6-Pyruvoyl-5,6,7,8-tetrahydropterin	C9H11N5O3	charge=0; abundance=99.24047070277432
C03722	Pyridine-2,3-dicarboxylate	Pyridine-2,3-dicarboxylate; Quinolinic acid; Quinolinate; 2,3-Pyridinedicarboxylic acid	C7H3NO4	charge=-2; abundance=99.9818735988283
C03741	(S)-4-Amino-5-oxopentanoate	(S)-4-Amino-5-oxopentanoate; L-Glutamate 1-semialdehyde	C5H8NO3	charge=-1; abundance=88.86254082604782
C03794	N6-(1,2-Dicarboxyethyl)-AMP	N6-(1,2-Dicarboxyethyl)-AMP; Adenylosuccinate; Adenylosuccinic acid	C14H14N5O11P	charge=-4; abundance=99.77864654918534
C03838	5'-Phosphoribosylglycinamide	5'-Phosphoribosylglycinamide; GAR; N1-(5-Phospho-D-ribosyl)glycinamide; Glycinamide ribonucleotide	C7H13N2O8P	charge=-2; abundance=87.76666148662409
C03871	L-2-Amino-6-oxoheptanedioate	L-2-Amino-6-oxoheptanedioate; L-2-Amino-6-oxopimelate	C7H10NO5	charge=-1; abundance=67.94018070087431
C03892	Phosphatidylglycerophosphate	Phosphatidylglycerophosphate; 3(3-sn-Phosphatidyl)-sn-glycerol 1-phosphate; 3(3-Phosphatidyl-)L-glycerol 1-phosphate; 1,2-Diacyl-sn-glycero-3-phospho-sn-glycerol 3'-phosphate	C8H14O13P2R2
C03912	(S)-1-Pyrroline-5-carboxylate	(S)-1-Pyrroline-5-carboxylate; L-1-Pyrroline-5-carboxylate; 1-Pyrroline-5-carboxylate	C5H6NO2	charge=-1; abundance=99.88182330280401
C03972	2,3,4,5-Tetrahydrodipicolinate	2,3,4,5-Tetrahydrodipicolinate; delta1-Piperidine-2,6-dicarboxylate; L-2,3,4,5-Tetrahydrodipicolinate; (S)-2,3,4,5-Tetrahydropyridine-2,6-dicarboxylate	C7H7NO4	charge=-2; abundance=99.99893023237982
C04051	5-Amino-4-imidazolecarboxyamide	5-Amino-4-imidazolecarboxyamide	C4H6N4O	charge=0; abundance=96.71149295360547
C04122	D-1-Aminopropan-2-ol O-phosphate	D-1-Aminopropan-2-ol O-phosphate; (R)-1-Aminopropan-2-yl phosphate	C3H9NO4P	charge=-1; abundance=66.99377011964712
C04133	N-Acetyl-L-glutamate 5-phosphate	N-Acetyl-L-glutamate 5-phosphate; N-Acetyl-L-glutamyl 5-phosphate	C7H9NO8P	charge=-3; abundance=99.76642052764466
C04144	Tetrahydropteroyltri-L-glutamate	Tetrahydropteroyltri-L-glutamate	C29H33N9O12	charge=-4; abundance=99.24283502828571
C04146	all-trans-Octaprenyl diphosphate	all-trans-Octaprenyl diphosphate; Farnesylfarnesylgeraniol	C40H65O7P2	charge=-3; abundance=97.53229928898298
C04181	3-Hydroxy-3-methyl-2-oxobutanoic acid	3-Hydroxy-3-methyl-2-oxobutanoic acid; 3-Hydroxy-3-methyl-2-oxobutanoate; 2-Oxo-3-hydroxyisovalerate	C5H7O4	charge=-1; abundance=99.9976984594386
C04216	all-trans-Heptaprenyl diphosphate	all-trans-Heptaprenyl diphosphate	C35H57O7P2	charge=-3; abundance=97.53229928898298
C04217	all-trans-Pentaprenyl diphosphate	all-trans-Pentaprenyl diphosphate	C25H41O7P2	charge=-3; abundance=97.53229928898298
C04236	3-Carboxy-4-methyl-2-oxopentanoate	3-Carboxy-4-methyl-2-oxopentanoate; 2-Oxo-4-methyl-3-carboxypentanoate	C7H8O5	charge=-2; abundance=99.98127604366596
C04272	(R)-2,3-Dihydroxy-3-methylbutanoate	(R)-2,3-Dihydroxy-3-methylbutanoate; (R)-2,3-Dihydroxy-isovalerate; (R)-2,3-Dihydroxy-isovaleric acid	C5H9O4	charge=-1; abundance=99.99209195981148
C04294	5-(2-Hydroxyethyl)-4-methylthiazole	5-(2-Hydroxyethyl)-4-methylthiazole; 4-Methyl-5-(2'-hydroxyethyl)-thiazole; 4-Methyl-5-(2-hydroxyethyl)-thiazole	C6H9NOS	charge=0; abundance=99.99984566875195
C04302	N-(5-Phospho-D-ribosyl)anthranilate	N-(5-Phospho-D-ribosyl)anthranilate; N-(5-Phospho-beta-D-ribosyl)anthranilate; N-(5-Phosphoribosyl)anthranilic acid	C12H13NO9P	charge=-3; abundance=99.73219698111636
C04327	4-Methyl-5-(2-phosphoethyl)-thiazole	4-Methyl-5-(2-phosphoethyl)-thiazole; 4-Methyl-5-(2-phosphono-oxyethyl)-thiazole	C6H8NO4PS	charge=-2; abundance=99.50797522294505
C04332	6,7-Dimethyl-8-(1-D-ribityl)lumazine	6,7-Dimethyl-8-(1-D-ribityl)lumazine	C13H17N4O6	charge=-1; abundance=99.05791407447563
C04352	(R)-4'-Phosphopantothenoyl-L-cysteine	(R)-4'-Phosphopantothenoyl-L-cysteine; N-[(R)-4'-Phosphopantothenoyl]-L-cysteine	C12H20N2O9PS	charge=-3; abundance=91.19117518545984
C04376	5'-Phosphoribosyl-N-formylglycinamide	5'-Phosphoribosyl-N-formylglycinamide; N-Formyl-GAR; N-Formylglycinamide ribonucleotide; N2-Formyl-N1-(5-phospho-D-ribosyl)glycinamide	C8H13N2O9P	charge=-2; abundance=99.79077571418975
C04405	(2S,3S)-3-Hydroxy-2-methylbutanoyl-CoA	(2S,3S)-3-Hydroxy-2-methylbutanoyl-CoA; (S)-3-Hydroxy-2-methylbutyryl-CoA	C26H40N7O18P3S	charge=-4; abundance=99.88369291831165
C04411	3-Isopropylmalate	3-Isopropylmalate; 3-Carboxy-2-hydroxy-4-methylpentanoate; 2-D-threo-hydroxy-3-carboxy-isocaproate	C7H10O5	charge=-2; abundance=99.96601873455724
C04421	N-Succinyl-LL-2,6-diaminoheptanedioate	N-Succinyl-LL-2,6-diaminoheptanedioate; N-Succinyl-LL-2,6-diaminopimelate; N-Succinyl-L-2,6-diaminoheptanedioate; N-Succinyl-L-2,6-diaminopimelate	C11H16N2O7	charge=-2; abundance=77.06970003035714
C04424	S-(2-Methylpropanoyl)-dihydrolipoamide	S-(2-Methylpropanoyl)-dihydrolipoamide; S-(2-Methylpropionyl)-dihydrolipoamide	C12H23NO2S2	charge=0; abundance=91.97310795959615
C04442	2-Dehydro-3-deoxy-6-phospho-D-gluconate	2-Dehydro-3-deoxy-6-phospho-D-gluconate; 6-Phospho-2-dehydro-3-deoxy-D-gluconate; 2-Keto-3-deoxy-6-phosphogluconate; 2-Dehydro-3-deoxy-D-gluconate 6-phosphate	C6H8O9P	charge=-3; abundance=99.57972737226133
C04454	5-Amino-6-(5'-phosphoribitylamino)uracil	5-Amino-6-(5'-phosphoribitylamino)uracil; 5-Amino-2,6-dioxy-4-(5'-phosphoribitylamino)pyrimidine; 5-Amino-6-(5-phosphoribitylamino)uracil	C9H15N4O9P	charge=-2; abundance=71.86106096076564
C04462	N-Succinyl-2-L-amino-6-oxoheptanedioate	N-Succinyl-2-L-amino-6-oxoheptanedioate; N-Succinyl-L-2-amino-6-oxoheptanedioate; N-Succinyl-L-2-amino-6-oxopimelate; N-Succinyl-2-amino-6-oxo-L-pimelic acid; N-Succinyl-epsilon-keto-L-aminopimelic acid; (S)-2-(Succinylamino)-6-oxoheptanedioate	C11H12NO8	charge=-3; abundance=99.99693980670176
C04489	5-Methyltetrahydropteroyltri-L-glutamate	5-Methyltetrahydropteroyltri-L-glutamate	C30H35N9O12	charge=-4; abundance=99.23091270913038
C04494	Guanosine 3'-diphosphate 5'-triphosphate	Guanosine 3'-diphosphate 5'-triphosphate; Guanosine 5'-triphosphate,3'-diphosphate	C10H11N5O20P5	charge=-7; abundance=88.95734316330693
C04556	4-Amino-2-methyl-5-phosphomethylpyrimidine	4-Amino-2-methyl-5-phosphomethylpyrimidine; 4-Amino-5-phosphomethyl-2-methylpyrimidine	C6H8N3O4P	charge=-2; abundance=99.26797872689902
C04590	sn-3-O-(Geranylgeranyl)glycerol 1-phosphate	sn-3-O-(Geranylgeranyl)glycerol 1-phosphate	C23H39O6P	charge=-2; abundance=99.65814621590083
C04638	2,3-Bis-O-(geranylgeranyl)glycerol 1-phosphate	2,3-Bis-O-(geranylgeranyl)glycerol 1-phosphate	C43H71O6P	charge=-2; abundance=99.81351941634425
C04640	2-(Formamido)-N1-(5'-phosphoribosyl)acetamidine	2-(Formamido)-N1-(5'-phosphoribosyl)acetamidine; 1-(5'-Phosphoribosyl)-N-formylglycinamidine; 5'-Phosphoribosyl-N-formylglycinamidine; 5'-Phosphoribosylformylglycinamidine; 2-(Formamido)-N1-(5-phospho-D-ribosyl)acetamidine	C8H14N3O8P	charge=-2; abundance=97.61585236029227
C04666	D-erythro-1-(Imidazol-4-yl)glycerol 3-phosphate	D-erythro-1-(Imidazol-4-yl)glycerol 3-phosphate; D-erythro-Imidazole-glycerol 3-phosphate; D-erythro-Imidazole-glycerol phosphate	C6H9N2O6P	charge=-2; abundance=99.55807772740128
C04677	1-(5'-Phosphoribosyl)-5-amino-4-imidazolecarboxamide	1-(5'-Phosphoribosyl)-5-amino-4-imidazolecarboxamide; 5'-Phosphoribosyl-5-amino-4-imidazolecarboxamide; 5'-Phospho-ribosyl-5-amino-4-imidazole carboxamide; AICAR; 5-Aminoimidazole-4-carboxamide ribotide; 5-Phosphoribosyl-4-carbamoyl-5-aminoimidazole; 5-Amino-1-(5-phospho-D-ribosyl)imidazole-4-carboxamide	C9H13N4O8P	charge=-2; abundance=99.77964655599438
C04691	2-Dehydro-3-deoxy-D-arabino-heptonate 7-phosphate	2-Dehydro-3-deoxy-D-arabino-heptonate 7-phosphate; 3-Deoxy-D-arabino-hept-2-ulosonate 7-phosphate; 3-Deoxy-arabino-heptulonate 7-phosphate; 3-Deoxy-D-arabino-heptulosonic acid 7-phosphate; DAHP; 2-Dahp	C7H10O10P	charge=-3; abundance=99.52713820635145
C04732	4-(1-D-Ribitylamino)-5-amino-2,6-dihydroxypyrimidine	4-(1-D-Ribitylamino)-5-amino-2,6-dihydroxypyrimidine; 4-(1-D-Ribitylamino)-5-aminouracil	C9H16N4O6	charge=0; abundance=72.09760373854543
C04734	1-(5'-Phosphoribosyl)-5-formamido-4-imidazolecarboxamide	1-(5'-Phosphoribosyl)-5-formamido-4-imidazolecarboxamide; 5'-Phosphoribosyl-5-formamido-4-imidazolecarboxamide; 5-Formamido-1-(5-phosphoribosyl)imidazole-4-carboxamide; 5-Formamido-1-(5-phospho-D-ribosyl)imidazole-4-carboxamide	C10H13N4O9P	charge=-2; abundance=99.76408760073109
C04751	1-(5-Phospho-D-ribosyl)-5-amino-4-imidazolecarboxylate	1-(5-Phospho-D-ribosyl)-5-amino-4-imidazolecarboxylate; 1-(5'-Phosphoribosyl)-5-amino-4-imidazolecarboxylate; 1-(5'-Phosphoribosyl)-5-amino-4-carboxyimidazole; 5'-Phosphoribosyl-5-amino-4-imidazolecarboxylate; 1-(5'-Phosphoribosyl)-4-carboxy-5-aminoimidazole; 5'-Phosphoribosyl-4-carboxy-5-aminoimidazole; 5-Amino-1-(5-phospho-D-ribosyl)imidazole-4-carboxylate	C9H11N3O9P	charge=-3; abundance=98.68405364883388
C04752	2-Methyl-4-amino-5-hydroxymethylpyrimidine diphosphate	2-Methyl-4-amino-5-hydroxymethylpyrimidine diphosphate; 4-Amino-2-methyl-5-diphosphomethylpyrimidine	C6H8N3O7P2	charge=-3; abundance=97.38818585409992
C04778	N1-(5-Phospho-alpha-D-ribosyl)-5,6-dimethylbenzimidazole	N1-(5-Phospho-alpha-D-ribosyl)-5,6-dimethylbenzimidazole	C14H17N2O7P	charge=-2; abundance=99.68836424496652
C04807	2-Amino-7,8-dihydro-4-hydroxy-6-(diphosphooxymethyl)pteridine	2-Amino-7,8-dihydro-4-hydroxy-6-(diphosphooxymethyl)pteridine; 2-Amino-4-hydroxy-6-hydroxymethyl-7,8-dihydropteridine diphosphate; 7,8-Dihydropterin pyrophosphate	C7H8N5O8P2	charge=-3; abundance=94.80622563372671
C04823	1-(5'-Phosphoribosyl)-5-amino-4-(N-succinocarboxamide)-imidazole	1-(5'-Phosphoribosyl)-5-amino-4-(N-succinocarboxamide)-imidazole; 1-(5'-Phosphoribosyl)-4-(N-succinocarboxamide)-5-aminoimidazole; 5'-Phosphoribosyl-4-(N-succinocarboxamide)-5-aminoimidazole; (S)-2-[5-Amino-1-(5-phospho-D-ribosyl)imidazole-4-; carboxamido]succinate	C13H15N4O12P	charge=-4; abundance=99.77351233871897
C04874	2-Amino-4-hydroxy-6-(D-erythro-1,2,3-trihydroxypropyl)-7,8-	2-Amino-4-hydroxy-6-(D-erythro-1,2,3-trihydroxypropyl)-7,8-; 2-Amino-4-hydroxy-6-(D-erythro-1,2,3-trihydroxypropyl)-7,8-dihydropteridine; Dihydroneopterin	C9H13N5O4	charge=0; abundance=97.0893651795164
C04895	2-Amino-4-hydroxy-6-(erythro-1,2,3-trihydroxypropyl)	2-Amino-4-hydroxy-6-(erythro-1,2,3-trihydroxypropyl); 2-Amino-4-hydroxy-6-(erythro-1,2,3-trihydroxypropyl)dihydropteridine triphosphate; 6-(L-erythro-1,2-Dihydroxypropyl 3-triphosphate)-7,8-dihydropterin; 6-[(1S,2R)-1,2-Dihydroxy-3-triphosphooxypropyl]-7,8-dihydropterin	C9H12N5O13P3	charge=-4; abundance=96.3848736644686
C04896	5-(5-Phospho-D-ribosylaminoformimino)-1-(5-phosphoribosyl)-	5-(5-Phospho-D-ribosylaminoformimino)-1-(5-phosphoribosyl)-; imidazole-4-carboxamide; N-(5'-Phospho-D-ribosylformimino)-5-amino-1-(5''-phospho-D-ribosyl)-; 4-imidazolecarboxamide; N-(5'-Phosphoribosylformimino)-5-amino-1-(5''-phosphoribosyl)-4-; imidazolecarboxamide; Phosphoribosyl-formimino-AICAR-phosphate; 1-(5-Phosphoribosyl)-5-[(5-; phosphoribosylamino)methylideneamino]imidazole-4-carboxamide	C15H21N5O15P2	charge=-4; abundance=99.40250619873856
C04916	N-(5'-Phospho-D-1'-ribulosylformimino)-5-amino-1-(5''-phospho-D-	N-(5'-Phospho-D-1'-ribulosylformimino)-5-amino-1-(5''-phospho-D-; ribosyl)-4-imidazolecarboxamide; 5-[(5-Phospho-1-deoxyribulos-1-ylamino)methylideneamino]-1-(5-; phosphoribosyl)imidazole-4-carboxamide; Phosphoribulosyl-formimino-AICAR-phosphate	C15H21N5O15P2	charge=-4; abundance=97.73486378537706
C05116	3-Hydroxybutanoyl-CoA	3-Hydroxybutanoyl-CoA	C25H38N7O18P3S	charge=-4; abundance=99.88369291831165
C05118	S-(2-Methylbutanoyl)-dihydrolipoamide	S-(2-Methylbutanoyl)-dihydrolipoamide	C13H25NO2S2	charge=0; abundance=91.97310764574289
C05119	S-(3-Methylbutanoyl)-dihydrolipoamide	S-(3-Methylbutanoyl)-dihydrolipoamide	C13H25NO2S2	charge=0; abundance=91.97311128767831
C05125	2-(alpha-Hydroxyethyl)thiamine diphosphate	2-(alpha-Hydroxyethyl)thiamine diphosphate; 2-Hydroxyethyl-ThPP	C14H20N4O8P2S	charge=-2; abundance=97.47140916203104
C05198	5'-Deoxyadenosine	5'-Deoxyadenosine	C10H13N5O3	charge=0; abundance=99.9537928836575
C05258	(S)-3-Hydroxyhexadecanoyl-CoA	(S)-3-Hydroxyhexadecanoyl-CoA	C37H62N7O18P3S	charge=-4; abundance=99.88369291831165
C05259	3-Oxopalmitoyl-CoA	3-Oxopalmitoyl-CoA; 3-Ketopalmitoyl-CoA; 3-Oxohexadecanoyl-CoA	C37H60N7O18P3S	charge=-4; abundance=98.70337126723977
C05260	(S)-3-Hydroxytetradecanoyl-CoA	(S)-3-Hydroxytetradecanoyl-CoA	C35H58N7O18P3S	charge=-4; abundance=99.88369291831165
C05261	3-Oxotetradecanoyl-CoA	3-Oxotetradecanoyl-CoA	C35H56N7O18P3S	charge=-4; abundance=98.70337126723977
C05262	(S)-3-Hydroxydodecanoyl-CoA	(S)-3-Hydroxydodecanoyl-CoA	C33H54N7O18P3S	charge=-4; abundance=99.88369291831165
C05263	3-Oxododecanoyl-CoA	3-Oxododecanoyl-CoA	C33H52N7O18P3S	charge=-4; abundance=98.70337126723977
C05264	(S)-Hydroxydecanoyl-CoA	(S)-Hydroxydecanoyl-CoA; (S)-3-Hydroxydecanoyl-CoA	C31H50N7O18P3S	charge=-4; abundance=99.88369291831165
C05265	3-Oxodecanoyl-CoA	3-Oxodecanoyl-CoA	C31H48N7O18P3S	charge=-4; abundance=98.70337126725477
C05266	(S)-Hydroxyoctanoyl-CoA	(S)-Hydroxyoctanoyl-CoA; (S)-3-Hydroxyoctanoyl-CoA	C29H46N7O18P3S	charge=-4; abundance=99.88369291831165
C05267	3-Oxooctanoyl-CoA	3-Oxooctanoyl-CoA	C29H44N7O18P3S	charge=-4; abundance=98.70337201354144
C05268	(S)-Hydroxyhexanoyl-CoA	(S)-Hydroxyhexanoyl-CoA; (S)-3-Hydroxyhexanoyl-CoA	C27H42N7O18P3S	charge=-4; abundance=99.88369291831165
C05269	3-Oxohexanoyl-CoA	3-Oxohexanoyl-CoA; 3-Ketohexanoyl-CoA	C27H40N7O18P3S	charge=-4; abundance=98.70457620464134
C05270	Hexanoyl-CoA	Hexanoyl-CoA	C27H42N7O17P3S	charge=-4; abundance=99.88369291831165
C05271	trans-Hex-2-enoyl-CoA	trans-Hex-2-enoyl-CoA	C27H40N7O17P3S	charge=-4; abundance=99.88369291831165
C05272	trans-Hexadec-2-enoyl-CoA	trans-Hexadec-2-enoyl-CoA; trans-2-Hexadecenoyl-CoA	C37H60N7O17P3S	charge=-4; abundance=99.88369291831165
C05273	trans-Tetradec-2-enoyl-CoA	trans-Tetradec-2-enoyl-CoA	C35H56N7O17P3S	charge=-4; abundance=99.88369291831165
C05274	Decanoyl-CoA	Decanoyl-CoA	C31H50N7O17P3S	charge=-4; abundance=99.88369291831165
C05275	trans-Dec-2-enoyl-CoA	trans-Dec-2-enoyl-CoA	C31H48N7O17P3S	charge=-4; abundance=99.88369291831165
C05276	trans-Oct-2-enoyl-CoA	trans-Oct-2-enoyl-CoA	C29H44N7O17P3S	charge=-4; abundance=99.88369291831165
C05379	Oxalosuccinate	Oxalosuccinate; Oxalosuccinic acid	C6H3O7	charge=-3; abundance=99.9903299758785
C05413	Phytoene	Phytoene	C40H64	charge=0; abundance=100.0
C05414	Phytofluene	Phytofluene	C40H62	charge=0; abundance=100.0
C05427	Phytyl diphosphate	Phytyl diphosphate	C20H39O7P2	charge=-3; abundance=97.53229928868036
C05430	zeta-Carotene	zeta-Carotene	C40H60	charge=0; abundance=100.0
C05431	Neurosporene	Neurosporene	C40H58	charge=0; abundance=100.0
C05432	Lycopene	Lycopene	C40H56	charge=0; abundance=100.0
C05435	gamma-Carotene	gamma-Carotene	C40H56	charge=0; abundance=100.0
C05512	Deoxyinosine	Deoxyinosine	C10H11N4O4	charge=-1; abundance=53.75469491864223
C05528	3-Sulfopyruvate	3-Sulfopyruvate; 3-Sulfopyruvic acid	C3H2O6S	charge=-2; abundance=99.99998844095553
C05643	6-Hydroxymelatonin	6-Hydroxymelatonin	C13H16N2O3	charge=0; abundance=66.29861377129507
C05668	3-Hydroxypropionyl-CoA	3-Hydroxypropionyl-CoA; 3-Hydroxypropionyl coemzyme A; 3-Hydroxypropanoyl-CoA; 3-Hydroxypropanoyl coemzymeA; 3-Hydroxyisobutyryl-CoA; 3-Hydroxyisobutyryl coemzyme A	C24H36N7O18P3S	charge=-4; abundance=99.88369291831165
C05752	Octanoyl-[acp]	Octanoyl-[acp]; Octanoyl-[acyl-carrier protein]	C8H15OSR
C05771	1-Aminopropan-2-ol	1-Aminopropan-2-ol	C3H10NO	charge=1; abundance=79.91502147247384
C05773	Cobyrinate	Cobyrinate; Cobyrinic acid	C45H52CoN4O14	charge=-6; abundance=99.95767321583176
C05775	alpha-Ribazole	alpha-Ribazole; N1-(alpha-D-ribosyl)-5,6-dimethylbenzimidazole	C14H18N2O4	charge=0; abundance=99.86557187863288
C05776	Vitamin B12	Vitamin B12	C61H90CoN13O14PR
C05778	Sirohydrochlorin	Sirohydrochlorin	C42H38N4O16	charge=-8; abundance=99.99057980553201
C05817	2-Succinyl-6-hydroxy-2,4-cyclohexadiene-1-carboxylate	2-Succinyl-6-hydroxy-2,4-cyclohexadiene-1-carboxylate; (1S,6R)-6-Hydroxy-2-succinylcyclohexa-2,4-diene-1-carboxylate	C11H10O6	charge=-2; abundance=99.99742442418861
C05818	2-Demethylmenaquinone	2-Demethylmenaquinone	C50H70O2
C05819	Menaquinol	Menaquinol	C51H74O2
C05824	S-Sulfo-L-cysteine	S-Sulfo-L-cysteine	C3H5NO5S2	charge=-2; abundance=50.62535783088598
C05840	Iminoaspartate	Iminoaspartate	C4H3NO4	charge=-2; abundance=99.9878480848199
C05841	Nicotinate D-ribonucleoside	Nicotinate D-ribonucleoside	C11H13NO6	charge=0; abundance=99.81076458727586
C05922	Formamidopyrimidine nucleoside triphosphate	Formamidopyrimidine nucleoside triphosphate	C10H14N5O15P3	charge=-4; abundance=96.71853264185127
C05923	2,5-Diaminopyrimidine nucleoside triphosphate	2,5-Diaminopyrimidine nucleoside triphosphate	C9H14N5O14P3	charge=-4; abundance=96.79764222786189
C05924	Molybdopterin	Molybdopterin	C10H10N5O6PS2	charge=-4; abundance=66.81453302447869
C05925	Dihydroneopterin phosphate	Dihydroneopterin phosphate; 2-Amino-4-hydroxy-6-(erythro-1,2,3-trihydroxypropyl)dihydropteridine phosphate	C9H12N5O7P	charge=-2; abundance=98.49076367431846
C05983	Propinol adenylate	Propinol adenylate; Propionyladenylate	C13H17N5O8P	charge=-1; abundance=99.95181780364577
C05993	Acetyl adenylate	Acetyl adenylate	C12H15N5O8P	charge=-1; abundance=99.95181779464292
C05998	3-Hydroxyisovaleryl-CoA	3-Hydroxyisovaleryl-CoA; 3-Hydroxyisovaleryl coenzyme A	C26H40N7O18P3S	charge=-4; abundance=99.88369291831165
C06000	(S)-3-Hydroxyisobutyryl-CoA	(S)-3-Hydroxyisobutyryl-CoA	C25H38N7O18P3S	charge=-4; abundance=99.88369291831165
C06001	(S)-3-Hydroxyisobutyrate	(S)-3-Hydroxyisobutyrate	C4H7O3	charge=-1; abundance=99.99765055503393
C06002	(S)-Methylmalonate semialdehyde	(S)-Methylmalonate semialdehyde	C4H5O3	charge=-1; abundance=99.99897852651259
C06006	(S)-2-Aceto-2-hydroxybutanoate	(S)-2-Aceto-2-hydroxybutanoate	C6H9O4	charge=-1; abundance=99.94055902920066
C06007	(R)-2,3-Dihydroxy-3-methylpentanoate	(R)-2,3-Dihydroxy-3-methylpentanoate; (R)-2,3-Dihydroxy-3-methylvalerate	C6H11O4	charge=-1; abundance=99.99136762506343
C06008	(3R)-3-Methyl-2-oxopentanoic acid	(3R)-3-Methyl-2-oxopentanoic acid; (R)-2-Oxo-3-methylpentanoic acid; (R)-2-Oxo-3-methylpentanoate	C6H9O3	charge=-1; abundance=99.99966973503336
C06010	(S)-2-Acetolactate	(S)-2-Acetolactate; (S)-2-Hydroxy-2-methyl-3-oxobutanoate	C5H7O4	charge=-1; abundance=99.9613653644944
C06032	D-erythro-3-Methylmalate	D-erythro-3-Methylmalate	C5H6O5	charge=-2; abundance=99.98084698925462
C06112	L-Glutamyl-tRNA(Gln)	L-Glutamyl-tRNA(Gln); Glu-tRNA(Gln)	C5H8NO4R
C06113	L-Aspartyl-tRNA(Asn)	L-Aspartyl-tRNA(Asn); Asp-tRNA(Asn)	C4H6NO4R
C06148	2,5-Diamino-6-(5'-triphosphoryl-3',4'-trihydroxy-2'-oxopentyl)-	2,5-Diamino-6-(5'-triphosphoryl-3',4'-trihydroxy-2'-oxopentyl)-; 2,5-Diamino-6-(5'-triphosphoryl-3',4'-trihydroxy-2'-oxopentyl)-amino-4-oxopyrimidine	C9H14N5O14P3	charge=-4; abundance=96.77357498605613
C06228	Ferrichrome	Ferrichrome	C27H45FeN9O12	charge=0; abundance=99.97025269594403
C06504	Cob(II)yrinate a,c diamide	Cob(II)yrinate a,c diamide; Cob(II)yrinate diamide; Cob(II)yrinic acid a,c-diamide	C45H56CoN6O12	charge=-4; abundance=99.93099497362627
C06505	Cob(I)yrinate a,c diamide	Cob(I)yrinate a,c diamide; Cob(I)yrinate diamide; Cob(I)yrinic acid a,c-diamide	C45H56CoN6O12	charge=-5; abundance=99.84750428252745
C06506	Adenosyl cobyrinate a,c diamide	Adenosyl cobyrinate a,c diamide; Adenosyl cobyrinate diamide; Adenosylcob(III)yrinic acid a,c-diamide; Adenosylcobyrinic acid a,c-diamide	C55H68CoN11O15	charge=-4; abundance=99.93366287444623
C06507	Adenosyl cobyrinate hexaamide	Adenosyl cobyrinate hexaamide; Adenosylcobyric acid	C55H76CoN15O11	charge=0; abundance=99.90078678890973
C06508	Adenosyl cobinamide	Adenosyl cobinamide	C58H84CoN16O11	charge=1; abundance=99.89246826489166
C06509	Adenosyl cobinamide phosphate	Adenosyl cobinamide phosphate	C58H83CoN16O14P	charge=-1; abundance=99.57890759462641
C06510	Adenosine-GDP-cobinamide	Adenosine-GDP-cobinamide; Adenosylcobinamide-GDP	C68H95CoN21O21P2	charge=-1; abundance=93.431014146508
C06697	Arsenite	Arsenite	AsH2O3	charge=-1; abundance=32.94674712622502
C06701	Phosphonate	Phosphonate	HO3P	charge=-2; abundance=74.3196758169741
C07086	Phenylacetic acid	Phenylacetic acid; Benzylformic acid; Phenylacetate; Benzeneacetiic acid	C8H7O2	charge=-1; abundance=99.99647687316309
C09332	Tetrahydrofolyl-[Glu](2)	Tetrahydrofolyl-[Glu](2); THF-L-glutamate	C24H27N8O9	charge=-3; abundance=99.24283032786926
C09819	(Hydroxymethylphenyl)succinyl-CoA	(Hydroxymethylphenyl)succinyl-CoA	C32H41N7O20P3S	charge=-5; abundance=99.9072209868908
C09820	Benzoylsuccinyl-CoA	Benzoylsuccinyl-CoA; 2-Benzoylsuccinyl-CoA	C32H39N7O20P3S	charge=-5; abundance=99.90766601813698
C11355	4-amino-4-deoxychorismate	4-amino-4-deoxychorismate; 4-Amino-4-deoxychorismate; ADC	C10H10NO5	charge=-1; abundance=56.77393590108463
C11538	Cobalt-precorrin 2	Cobalt-precorrin 2	C42H36CoN4O16	charge=-8; abundance=99.99508162825892
C11539	Cobalt-precorrin 3	Cobalt-precorrin 3	C43H40CoN4O16	charge=-8; abundance=99.9962378081785
C11540	Cobalt-precorrin 4	Cobalt-precorrin 4	C44H43CoN4O16	charge=-7; abundance=99.94040229002898
C11541	Cobalt-precorrin 5	Cobalt-precorrin 5	C45H46CoN4O16	charge=-6; abundance=99.98865127182371
C11542	Cobalt-precorrin 6	Cobalt-precorrin 6	C44H45CoN4O16	charge=-7; abundance=99.99087653777377
C11543	Cobalt-dihydro-precorrin 6	Cobalt-dihydro-precorrin 6	C44H47CoN4O16	charge=-7; abundance=99.99044260938602
C11545	Cobalt-precorrin 8	Cobalt-precorrin 8	C45H52CoN4O14	charge=-6; abundance=99.9217571575569
C12147	L-Threonine O-3-phosphate	L-Threonine O-3-phosphate; L-Threonine phosphate	C4H7NO6P	charge=-3; abundance=65.64552920319109
C13863	2,3-Di-O-phytanyl-sn-glycerol	2,3-Di-O-phytanyl-sn-glycerol; Archaeol	C43H88O3	charge=0; abundance=99.99975059250626
C14463	(R)-3-Hydroxy-3-methyl-2-oxopentanoate	(R)-3-Hydroxy-3-methyl-2-oxopentanoate	C6H9O4	charge=-1; abundance=99.9958311999606
C15556	3, 4-Dihydroxy-2-butanone 4-phosphate	3, 4-Dihydroxy-2-butanone 4-phosphate	C4H7O6P	charge=-2; abundance=99.71890996239536
C15809	Iminoglycine	Iminoglycine; Iminoacetic acid	C2H2NO2	charge=-1; abundance=99.99914392907861
C15812	Thiamine biosynthesis intermediate 3	Thiamine biosynthesis intermediate 3
C15813	Thiamine biosynthesis intermediate 4	Thiamine biosynthesis intermediate 4
C15814	Thiamine biosynthesis intermediate 5	Thiamine biosynthesis intermediate 5
C15815	C15815	C15815; Thiamine biosynthesis intermediate 6
C16237	Protein N6-(lipoyl)lysine	Protein N6-(lipoyl)lysine	C8H14NOS2R
C16238	Lipoyl-AMP	Lipoyl-AMP	C18H25N5O8PS2	charge=-1; abundance=99.95181780433845
C16239	Lipoyl-[acp]	Lipoyl-[acp]; Lipoyl-[acyl carrier protein]; Lipoyl-ACP	C8H13OS3R
C16240	Apoprotein	Apoprotein	NH2R
C16848	6-Deoxy-5-ketofructose 1-phosphate	6-Deoxy-5-ketofructose 1-phosphate	C6H9O8P	charge=-2; abundance=99.28786077237069
C16850	2-Amino-3,7-dideoxy-D-threo-hept-6-ulosonic acid	2-Amino-3,7-dideoxy-D-threo-hept-6-ulosonic acid	C7H12NO5	charge=-1; abundance=69.23940932427618
C90000	H+ (pmf associated)	H+ (pmf associated)	H
C90001	Photon	Photon
C90004	Sodium (pmf associated)	Sodium (pmf associated)	Na
C90006	4-Ketofructose-1,6-bisphosphate	4-Ketofructose-1,6-bisphosphate	C6H9O12P2
C90010	Cyclic pyranopterin monophosphate	Cyclic pyranopterin monophosphate; cPMP; Precursor Z	C10H13N5O8P	charge=-1; abundance=94.79804089388168
C90011	Molybdenum cofactor	Molybdenum cofactor; MoCo	C10H10N5O6PS2	charge=-4; abundance=67.31962354367843
C90012	MoCo dinucleotide (Guanine)	MoCo dinucleotide (Guanine)	C20H25N10O13P2S2	charge=-3; abundance=63.64448546573742
C90014	Halocyanin (oxidized)	Halocyanin (oxidized)	X
C90015	Halocyanin (reduced)	Halocyanin (reduced)	HX
C90016	Isopentenyl phosphate	Isopentenyl phosphate	C5H9O4P1
C90017	Hydroxypyruvaldehyde 3-P	Hydroxypyruvaldehyde 3-P	C3H5O6P1
C90018	Compound I	Compound I	C7H13O5N1
C90019	6-Deoxy-5-ketomannitol-1-phosphate	6-Deoxy-5-ketomannitol-1-phosphate; DKMP	C6H11O8P
CE00001	H2O (E)	H2O (E)	H2O	charge=0; abundance=99.99998004738083
CE00007	Oxygen (E)	Oxygen (E)	O2	charge=0; abundance=100.0
CE00009	Orthophosphate (E)	Orthophosphate (E); Phosphate (E)	HO4P	charge=-2; abundance=33.03363409220135
CE00011	CO2 (E)	CO2 (E)	CO2	charge=0; abundance=100.0
CE00014	NH3 (E)	NH3 (E)	H3N	charge=0; abundance=57.878791444426355
CE00022	Pyruvate (E)	Pyruvate (E)	C3H3O3	charge=-1; abundance=99.99991486130914
CE00023	Iron (E)	Iron (E)	Fe	charge=0; abundance=100.0
CE00025	L-Glutamate (E)	L-Glutamate (E)	C5H8NO4	charge=-1; abundance=77.46195690343417
CE00031	D-Glucose (E)	D-Glucose (E)	C6H12O6	charge=0; abundance=99.49903603236149
CE00033	Acetate (E)	Acetate (E)	C2H3O2	charge=-1; abundance=99.99650518250644
CE00034	Manganese (E)	Manganese (E)	Mn	charge=0; abundance=100.0
CE00037	Glycine (E)	Glycine (E)	C2H5NO2	charge=0; abundance=63.49183102353657
CE00038	Zinc (E)	Zinc (E)	Zn	charge=0; abundance=100.0
CE00041	L-Alanine (E)	L-Alanine (E)	C3H7NO2	charge=0; abundance=74.98994338396744
CE00042	Succinate (E)	Succinate (E)	C4H4O4	charge=-2; abundance=99.95139257839497
CE00047	L-Lysine (E)	L-Lysine (E)	C6H15N2O2	charge=1; abundance=72.54563930860341
CE00049	L-Aspartate (E)	L-Aspartate (E)	C4H6NO4	charge=-1; abundance=80.42803910256036
CE00058	Formate (E)	Formate (E)	CHO2	charge=-1; abundance=99.99814172530111
CE00059	Sulfate (E)	Sulfate (E)	O4S	charge=-2; abundance=99.99999212182922
CE00062	L-Arginine (E)	L-Arginine (E)	C6H15N4O2	charge=1; abundance=57.10287159468652
CE00064	L-Glutamine (E)	L-Glutamine (E)	C5H10N2O3	charge=0; abundance=67.22841407333459
CE00065	L-Serine (E)	L-Serine (E)	C3H6NO3	charge=-1; abundance=53.94525751411381
CE00070	Copper (E)	Copper (E)	Cu	charge=0; abundance=100.0
CE00073	L-Methionine (E)	L-Methionine (E)	C5H11NO2S	charge=0; abundance=76.07142238304881
CE00077	L-Ornithine (E)	L-Ornithine (E)	C5H13N2O2	charge=1; abundance=72.19227108588794
CE00078	L-Tryptophan (E)	L-Tryptophan (E)	C11H12N2O2	charge=0; abundance=71.34024695000288
CE00079	L-Phenylalanine (E)	L-Phenylalanine (E)	C9H11NO2	charge=0; abundance=73.67356392103841
CE00080	H+ (E)	H+ (E)	H	charge=1; abundance=100.0
CE00082	L-Tyrosine (E)	L-Tyrosine (E)	C9H11NO3	charge=0; abundance=56.88240009892337
CE00097	L-Cysteine (E)	L-Cysteine (E)	C3H7NO2S	charge=0; abundance=51.46777058886698
CE00098	Oligopeptide (E)	Oligopeptide (E)	C2H4NO2R(C2H2NOR)n
CE00106	Uracil (E)	Uracil (E)	C4H4N2O2	charge=0; abundance=85.44338792363693
CE00107	Dipeptide (E)	Dipeptide (E)	C4H6N2O3R2
CE00116	Glycerol (E)	Glycerol (E)	C3H8O3	charge=0; abundance=99.99751977995435
CE00120	Biotin (E)	Biotin (E)	C10H15N2O3S	charge=-1; abundance=99.99388235566177
CE00121	D-Ribose (E)	D-Ribose (E)	C5H10O5	charge=0; abundance=99.50771600901487
CE00122	Fumarate (E)	Fumarate (E)	C4H2O4	charge=-2; abundance=99.99741491139237
CE00123	L-Leucine (E)	L-Leucine (E)	C6H13NO2	charge=0; abundance=76.76336790713789
CE00124	D-Galactose (E)	D-Galactose (E)	C6H12O6	charge=0; abundance=99.49903603236149
CE00135	L-Histidine (E)	L-Histidine (E)	C6H9N3O2	charge=0; abundance=64.00100455060479
CE00147	Adenine (E)	Adenine (E)	C5H5N5	charge=0; abundance=87.95809458377013
CE00148	L-Proline (E)	L-Proline (E)	C5H9NO2	charge=0; abundance=99.53657991139148
CE00149	(S)-Malate (E)	(S)-Malate (E)	C4H4O5	charge=-2; abundance=99.98608691398819
CE00150	Molybdenum (E)	Molybdenum (E)	Mo	charge=0; abundance=100.0
CE00152	L-Asparagine (E)	L-Asparagine (E)	C4H7N2O3	charge=-1; abundance=78.65814994184792
CE00158	Citrate (E)	Citrate (E)	C6H5O7	charge=-3; abundance=99.9739932903922
CE00175	Cobalt (E)	Cobalt (E)	Co	charge=2; abundance=100.0
CE00178	Thymine (E)	Thymine (E)	C5H6N2O2	charge=0; abundance=91.33500540412527
CE00183	L-Valine (E)	L-Valine (E)	C5H11NO2	charge=0; abundance=79.89255209424152
CE00188	L-Threonine (E)	L-Threonine (E)	C4H9NO3	charge=0; abundance=50.14343709987108
CE00194	Cobamide coenzyme (E)	Cobamide coenzyme (E)	C72H100CoN18O17P	charge=0; abundance=99.82994748859048
CE00197	3-Phospho-D-Glycerate (E)	3-Phospho-D-Glycerate (E)	C3H4O7P	charge=-3; abundance=99.69861904159342
CE00209	Oxalate (E)	Oxalate (E)	C2O4	charge=-2; abundance=99.99871110543825
CE00212	Adenosine (E)	Adenosine (E)	C10H13N5O4	charge=0; abundance=99.95156139390748
CE00214	Thymidine (E)	Thymidine (E)	C10H14N2O5	charge=0; abundance=90.12423384275952
CE00238	Potassium (E)	Potassium (E)	K	charge=1; abundance=100.0
CE00242	Guanine (E)	Guanine (E)	C5H5N5O	charge=0; abundance=89.09094968832602
CE00244	Nitrate (E)	Nitrate (E)	NO3	charge=-1; abundance=99.99999999601883
CE00249	Hexadecanoic acid (E)	Hexadecanoic acid (E)	C16H31O2	charge=-1; abundance=99.99104674879143
CE00256	(R)-Lactate (E)	(R)-Lactate (E)	C3H5O3	charge=-1; abundance=99.99913552003515
CE00262	Hypoxanthine (E)	Hypoxanthine (E)	C5H3N4O	charge=-1; abundance=51.33579711520456
CE00266	Glycolaldehyde (E)	Glycolaldehyde (E)	C2H4O2	charge=0; abundance=99.99941433401344
CE00282	Hydrogen (E)	Hydrogen (E)	H2
CE00294	Inosine (E)	Inosine (E)	C10H11N4O5	charge=-1; abundance=53.77700065972061
CE00299	Uridine (E)	Uridine (E)	C9H12N2O6	charge=0; abundance=83.38655399854913
CE00305	Magnesium (E)	Magnesium (E)	Mg	charge=2; abundance=100.0
CE00327	L-Citrulline (E)	L-Citrulline (E)	C6H13N3O3	charge=0; abundance=62.6764594886609
CE00330	Deoxyguanosine (E)	Deoxyguanosine (E)	C10H13N5O4	charge=0; abundance=93.50836199477153
CE00378	Thiamin (E)	Thiamin (E)	C12H17N4OS	charge=1; abundance=99.96550209953976
CE00380	Cytosine (E)	Cytosine (E)	C4H5N3O	charge=0; abundance=90.60947000131632
CE00387	Guanosine (E)	Guanosine (E)	C10H13N5O5	charge=0; abundance=93.46702027835309
CE00407	L-Isoleucine (E)	L-Isoleucine (E)	C6H13NO2	charge=0; abundance=79.6011428714659
CE00475	Cytidine (E)	Cytidine (E)	C9H13N3O5	charge=0; abundance=99.97202537109226
CE00504	Folate (E)	Folate (E)	C19H17N7O6	charge=-2; abundance=90.74887817413659
CE00526	Deoxyuridine (E)	Deoxyuridine (E)	C9H12N2O5	charge=0; abundance=83.54821796042577
CE00559	Deoxyadenosine (E)	Deoxyadenosine (E)	C10H13N5O3	charge=0; abundance=99.9849126632637
CE00623	Glycerol 1-phosphate (E)	Glycerol 1-phosphate (E)	C3H7O6P	charge=-2; abundance=99.6573505116807
CE00698	Cl- (E)	Cl- (E)	Cl	charge=-1; abundance=100.0
CE00719	Betaine (E)	Betaine (E)	C5H11NO2	charge=0; abundance=99.99998182126323
CE00864	Pantothenate (E)	Pantothenate (E)	C9H16NO5	charge=-1; abundance=99.9771222481357
CE00881	Deoxycytidine (E)	Deoxycytidine (E)	C9H13N3O4	charge=0; abundance=99.99871536325743
CE01330	Sodium (E)	Sodium (E)	Na	charge=1; abundance=100.0
CE01413	Cadmium (E)	Cadmium (E)	Cd	charge=2; abundance=100.0
CE05776	Vitamin B12 (E)	Vitamin B12 (E)	C61H90CoN13O14PR
CE06228	Ferrichrome (E)	Ferrichrome (E)	C27H45FeN9O12	charge=0; abundance=99.97025269594403
CE06510	Adenosine-GDP-Cobinamide (E)	Adenosine-GDP-Cobinamide (E)	C68H95CoN21O21P2	charge=-1; abundance=93.431014146508
CE06697	Arsenite (E)	Arsenite (E)	AsH2O3	charge=-1; abundance=32.94674712622502
CE06701	Phosphonate (E)	Phosphonate (E)	HO3P	charge=-2; abundance=74.3196758169741
CM00001	Biomass (OD ml)	Biomass (OD ml)
CM00002	BM: S-layer glyco (OD ml)	BM: S-layer glyco (OD ml)
CM00005	BM: Amino acids (OD ml)	BM: Amino acids (OD ml)
CM00006	BM: DNA (OD ml)	BM: DNA (OD ml)
CM00007	BM: RNA (OD ml)	BM: RNA (OD ml)
CM00008	BM: Cofactors (OD ml)	BM: Cofactors (OD ml)
CM00009	BM: Lipids (OD ml)	BM: Lipids (OD ml)
CM00010	BM: Salts (OD ml)	BM: Salts (OD ml)

## Sheet: Reactions
Notes: *The biomass reaction is split into 7 subreactions for readability (RM00002-RM00008). These subreactions are assembled into the complete biomass definition by RM00001. *The biomass reaction, as defined below, does not include maintenance energy.
id	reaction_using_names	reaction_using_ids	enzymes	orfs	gene_logic	name
R00004	1 Pyrophosphate + 1 H2O => 2 Orthophosphate	1 C00013 + 1 C00001 => 2 C00009	3.6.1.1	NP5192A	NP5192A
R00009	2 H2O2 => 1 Oxygen + 2 H2O	2 C00027 => 1 C00007 + 2 C00001	1.11.1.6	NP2708A	NP2708A	Hydorogen-peroxide:hydrogen-peroxide oxidoreductase
R00014	1 Pyruvate + 1 Thiamin diphosphate + 1 H+ => 1 2-(alpha-Hydroxyethyl)thiamine diphosphate + 1 CO2	1 C00022 + 1 C00068 + 1 C00080 => 1 C05125 + 1 C00011	2.2.1.6	NP2200A NP2202A	NP2200A ^ NP2202A
R00024	1 D-Ribulose 1,5-bisphosphate + 1 CO2 + 1 H2O => 2 3-Phospho-D-glycerate + 2 H+	1 C01182 + 1 C00011 + 1 C00001 => 2 C00197 + 2 C00080	4.1.1.39	NP2770A	NP2770A
R00032	1 beta-Carotene + 1 Oxygen => 2 Retinal	1 C02094 + 1 C00007 => 2 C00376	1.14.99.36			beta-Carotene:oxygen 15,15'-oxidoreductase (bond-cleaving)
R00036	2 5-Aminolevulinate <=> 1 Porphobilinogen + 2 H2O	2 C00430 <=> 1 C00931 + 2 C00001	4.2.1.24	NP0920A	NP0920A
R00066	2 6,7-Dimethyl-8-(1-D-ribityl)lumazine + 1 H+ => 1 Riboflavin + 1 4-(1-D-Ribitylamino)-5-amino-2,6-dihydroxypyrimidine	2 C04332 + 1 C00080 => 1 C00255 + 1 C04732	2.5.1.9	NP1356A	NP1356A	6,7-Dimethyl-8-(1-D-ribityl)lumazine:6,7-dimethyl-8-(1-D-ribityl) lumazine 2,3-butanediyltransferase
R00084	4 Porphobilinogen + 1 H2O <=> 1 Hydroxymethylbilane + 4 NH3	4 C00931 + 1 C00001 <=> 1 C01024 + 4 C00014	2.5.1.61	NP1326A	NP1326A
R00086	1 ATP + 1 H2O => 1 ADP + 1 Orthophosphate + 1 H+	1 C00002 + 1 C00001 => 1 C00008 + 1 C00009 + 1 C00080	3.6.1.15 3.6.3.14	NP4426A NP0264A NP1018A NP1020A NP1022A NP1024A NP1026A NP1028A NP1030A NP1032A	NP4426A ^ NP0264A ^ NP1018A ^ NP1020A ^ NP1022A ^ NP1024A ^ NP1026A ^ NP1028A ^ NP1030A ^ NP1032A	ATP phosphohydrolase (protein-secreting)
R00089	1 ATP => 1 3',5'-Cyclic AMP + 1 Pyrophosphate + 1 H+	1 C00002 => 1 C00575 + 1 C00013 + 1 C00080	4.6.1.1	NP3092A	NP3092A	ATP pyrophosphate-lyase (cyclizing)
R00104	1 ATP + 1 NAD+ => 1 ADP + 1 NADP+ + 1 H+	1 C00002 + 1 C00003 => 1 C00008 + 1 C00006 + 1 C00080	2.7.1.23	NP2512A NP4558A	NP2512A v NP4558A	ATP:NAD+ 2'-phosphotransferase
R00124	1 ATP + 1 ADP <=> 1 ADP + 1 ATP	1 C00002 + 1 C00008 <=> 1 C00008 + 1 C00002	2.7.4.6	NP3666A	NP3666A	ATP:nucleoside-diphosphate phosphatransferase
R00127	1 ATP + 1 AMP <=> 2 ADP	1 C00002 + 1 C00020 <=> 2 C00008	2.7.4.3	NP4910A	NP4910A	ATP:AMP phosphotransferase
R00130	1 ATP + 1 Dephospho-CoA => 1 ADP + 1 CoA + 1 H+	1 C00002 + 1 C00882 => 1 C00008 + 1 C00010 + 1 C00080	2.7.1.24	NP0870A	NP0870A	ATP:dephospho-CoA 3'-phosphotransferase
R00131	1 Urea + 1 H2O => 1 CO2 + 2 NH3	1 C00086 + 1 C00001 => 1 C00011 + 2 C00014	3.5.1.5	NP2008A NP2010A NP2012A NP2014A NP2016A NP2018A NP2020A	NP2008A ^ NP2010A ^ NP2012A ^ NP2014A ^ NP 2016A ^ NP2018A ^ NP2020A	Urea amidohydrolase
R00137	1 ATP + 1 Nicotinamide D-ribonucleotide => 1 Pyrophosphate + 1 NAD+	1 C00002 + 1 C00455 => 1 C00013 + 1 C00003	2.7.7.1	NP0310A NP0908A	NP0310A v NP0908A	ATP:nicotinamide-nucleotide adenylyltransferase
R00149	2 ATP + 1 NH3 + 1 CO2 + 1 H2O => 2 ADP + 1 Orthophosphate + 1 Carbamoyl phosphate + 2 H+	2 C00002 + 1 C00014 + 1 C00011 + 1 C00001 => 2 C00008 + 1 C00009 + 1 C00169 + 2 C00080	6.3.4.16	NP4506A NP4830A		Carbon-dioxide:ammonia ligase (ADP-forming,carbamate-phosphorylating)
R00150	1 ADP + 1 Carbamoyl phosphate + 1 H+ => 1 ATP + 1 NH3 + 1 CO2	1 C00008 + 1 C00169 + 1 C00080 => 1 C00002 + 1 C00014 + 1 C00011	2.7.2.2	NP3632A	NP3632A	ATP:carbamate phosphotransferase
R00156	1 ATP + 1 UDP <=> 1 ADP + 1 UTP	1 C00002 + 1 C00015 <=> 1 C00008 + 1 C00075	2.7.4.6	NP3666A	NP3666A	ATP:nucleoside-diphosphate phosphatransferase
R00158	1 ATP + 1 UMP <=> 1 ADP + 1 UDP	1 C00002 + 1 C00105 <=> 1 C00008 + 1 C00015	2.7.4.14	NP4914A	NP4914A	ATP:nucleoside-phosphate phosphotransferase
R00160	1 FAD + 1 H2O => 1 AMP + 1 FMN + 2 H+	1 C00016 + 1 C00001 => 1 C00020 + 1 C00061 + 2 C00080	3.6.1.9 3.6.1.18			FAD nucleotidohydrolase
R00161	1 ATP + 1 FMN => 1 Pyrophosphate + 1 FAD	1 C00002 + 1 C00061 => 1 C00013 + 1 C00016	2.7.7.2			ATP:FMN adenylyltransferase
R00177	1 ATP + 1 L-Methionine + 1 H2O => 1 Orthophosphate + 1 Pyrophosphate + 1 S-Adenosyl-L-methionine + 1 H+	1 C00002 + 1 C00073 + 1 C00001 => 1 C00009 + 1 C00013 + 1 C00019 + 1 C00080	2.5.1.6	NP3100A	NP3100A	ATP:L-methione S-adenosyltransferase
R00183	1 AMP + 1 H2O => 1 Adenosine + 1 Orthophosphate	1 C00020 + 1 C00001 => 1 C00212 + 1 C00009	3.1.3.5	NP2590A NP1854A	NP2590A v NP1854A	Adenosine 5'-monophosphate phosphohydrolase
R00188	1 Adenosine 3',5'-bisphosphate + 1 H2O => 1 AMP + 1 Orthophosphate	1 C00054 + 1 C00001 => 1 C00020 + 1 C00009	3.1.3.7			Adenosine 3',5'-bisphosphate 3'(2')-phosphohydrolase
R00190	1 Adenine + 1 5-Phospho-alpha-D-ribose 1-diphosphate => 1 AMP + 1 Pyrophosphate + 1 H+	1 C00147 + 1 C00119 => 1 C00020 + 1 C00013 + 1 C00080	2.4.2.7	NP1426A NP1254A	NP1426A v NP1254A	AMP:pyrophosphate phosphoribosyltransferase
R00192	1 S-Adenosyl-L-homocysteine + 1 H2O <=> 1 Adenosine + 1 L-Homocysteine	1 C00021 + 1 C00001 <=> 1 C00212 + 1 C00155	3.3.1.1	NP0968A	NP0968A	S-Adenosyl-L-homocysteine hydrolase
R00199	1 ATP + 1 Pyruvate + 1 H2O => 1 AMP + 1 Phosphoenolpyruvate + 1 Orthophosphate + 2 H+	1 C00002 + 1 C00022 + 1 C00001 => 1 C00020 + 1 C00074 + 1 C00009 + 2 C00080	2.7.9.2	NP1196A	NP1196A	ATP:pyruvate,water phosphotransferase
R00200	1 ADP + 1 Phosphoenolpyruvate + 1 H+ => 1 ATP + 1 Pyruvate	1 C00008 + 1 C00074 + 1 C00080 => 1 C00002 + 1 C00022	2.7.1.40	NP1746A	NP1746A	ATP:pyruvate O2-phosphotransferase
R00203	1 Methylglyoxal + 1 NAD+ + 1 H2O => 1 Pyruvate + 1 NADH + 2 H+	1 C00546 + 1 C00003 + 1 C00001 => 1 C00022 + 1 C00004 + 2 C00080	1.2.1.22 1.2.1.23	NP1686A NP3020A		Pyruvaldehyde:NAD+ oxidoreductase Pyruvaldehyde:NAD+ 2-oxidoreductase
R00216	1 (S)-Malate + 1 NADP+ => 1 Pyruvate + 1 CO2 + 1 NADPH	1 C00149 + 1 C00006 => 1 C00022 + 1 C00011 + 1 C00005	1.1.1.40	NP1772A NP0132A	NP1772A v NP0132A	(S)-Malate:NADP+ oxidoreductase(oxaloacetate-decarboxylating)
R00220	1 L-Serine => 1 Pyruvate + 1 NH3	1 C00065 => 1 C00022 + 1 C00014	4.3.1.19	NP1076A	NP1076A	L-serine ammonia-lyase
R00226	2 Pyruvate + 1 H+ => 1 (S)-2-Acetolactate + 1 CO2	2 C00022 + 1 C00080 => 1 C06010 + 1 C00011	2.2.1.6	NP2200A NP2202A	NP2200A ^ NP2202A
R00227	1 Acetyl-CoA + 1 H2O => 1 CoA + 1 Acetate + 1 H+	1 C00024 + 1 C00001 => 1 C00010 + 1 C00033 + 1 C00080	3.1.2.1	NP4924A NP2700A		Acetyl-CoA hydrolase
R00229	1 ATP + 1 Acetate + 1 CoA => 1 ADP + 1 Acetyl-CoA + 1 Orthophosphate	1 C00002 + 1 C00033 + 1 C00010 => 1 C00008 + 1 C00024 + 1 C00009	6.2.1.13	NP2858A		Acetate:CoA ligase (ADP-forming)
R00230	1 Acetyl-CoA + 1 Orthophosphate <=> 1 CoA + 1 Acetyl phosphate	1 C00024 + 1 C00009 <=> 1 C00010 + 1 C00227	2.3.1.8	NP1772A NP0132A	NP1772A v NP0132A	Acetyl-CoA:orthophosphate acetyltransferase
R00235	1 ATP + 1 Acetate + 1 CoA => 1 AMP + 1 Pyrophosphate + 1 Acetyl-CoA + 1 H+	1 C00002 + 1 C00033 + 1 C00010 => 1 C00020 + 1 C00013 + 1 C00024 + 1 C00080	6.2.1.1	NP4240A NP4242A NP5128A NP5132A NP0164A		Acetate:CoA ligase (AMP-forming)
R00236	1 Acetyl adenylate + 1 CoA => 1 AMP + 1 Acetyl-CoA + 1 H+	1 C05993 + 1 C00010 => 1 C00020 + 1 C00024 + 1 C00080	6.2.1.1	NP4240A NP4242A NP5128A NP5132A NP0164A		Acetyl adenylate:CoA ligase (AMP-forming)
R00238	2 Acetyl-CoA <=> 1 CoA + 1 Acetoacetyl-CoA	2 C00024 <=> 1 C00010 + 1 C00332	2.3.1.16	NP2214A NP2260A NP2606A NP2612A NP3420A NP3438A NP3650A NP4580A	NP2214A v NP2260A v NP2606A v NP2612A v NP3420A v NP3438A v NP3650A v NP4580A	Acetyl-CoA:acetyl-CoA C-acetyltransferase
R00239	1 ATP + 1 L-Glutamate => 1 ADP + 1 L-Glutamyl 5-phosphate	1 C00002 + 1 C00025 => 1 C00008 + 1 C03287	2.7.2.11	NP3976A	NP3976A	ATP:L-glutamate 5-phosphotransferase
R00248	1 L-Glutamate + 1 NADP+ + 1 H2O <=> 1 2-Oxoglutarate + 1 NH3 + 1 NADPH + 2 H+	1 C00025 + 1 C00006 + 1 C00001 <=> 1 C00026 + 1 C00014 + 1 C00005 + 2 C00080	1.4.1.3 1.4.1.4	NP1582A NP1806A NP6184A	NP1582A v NP1806A	L-Glutamate:NADP+ oxidoreductase (deaminating)
R00253	1 ATP + 1 L-Glutamate + 1 NH3 => 1 ADP + 1 Orthophosphate + 1 L-Glutamine	1 C00002 + 1 C00025 + 1 C00014 => 1 C00008 + 1 C00009 + 1 C00064	6.3.1.2	NP0076A NP4376A		L-Glutamate:ammonia ligase (ADP-forming)
R00257	1 ATP + 1 Deamino-NAD+ + 1 L-Glutamine + 1 H2O => 1 AMP + 1 Pyrophosphate + 1 NAD+ + 1 L-Glutamate + 2 H+	1 C00002 + 1 C00857 + 1 C00064 + 1 C00001 => 1 C00020 + 1 C00013 + 1 C00003 + 1 C00025 + 2 C00080	6.3.5.1	NP0054A NP3828A	NP0054A v NP3828A	Deamido-NAD+:L-glutamine amido-ligase (AMP-forming)
R00258	1 L-Alanine + 1 2-Oxoglutarate <=> 1 Pyruvate + 1 L-Glutamate	1 C00041 + 1 C00026 <=> 1 C00022 + 1 C00025	2.6.1.2	NP0824A NP1666A NP4024A NP4410A		L-Alanine:2-oxoglutarate aminotransferase
R00259	1 Acetyl-CoA + 1 L-Glutamate => 1 CoA + 1 N-Acetyl-L-glutamate + 1 H+	1 C00024 + 1 C00025 => 1 C00010 + 1 C00624 + 1 C00080	2.3.1.1			Acetyl-CoA:L-glutamate N-acetyltransferase
R00261	1 L-Glutamate + 1 H+ => 1 4-Aminobutanoate + 1 CO2	1 C00025 + 1 C00080 => 1 C00334 + 1 C00011	4.1.1.19 4.1.1.15	NP1194A		L-Glutamate 1-carboxy-lyase
R00268	1 Oxalosuccinate + 1 H+ <=> 1 2-Oxoglutarate + 1 CO2	1 C05379 + 1 C00080 <=> 1 C00026 + 1 C00011	1.1.1.42	NP2430A	NP2430A	Oxalosuccinate:NADP+ oxidoreductase (decarboxylating)
R00271	1 Acetyl-CoA + 1 H2O + 1 2-Oxoglutarate => 1 2-Hydroxybutane-1,2,4-tricarboxylate + 1 CoA + 1 H+	1 C00024 + 1 C00001 + 1 C00026 => 1 C01251 + 1 C00010 + 1 C00080	2.3.3.14	NP2994A	NP2994A	2-Hydroxybutane-1,2,4-tricarboxylate 2-oxoglutarate-lyase (CoA-acetylating)
R00275	2 O2.- + 2 H+ <=> 1 H2O2 + 1 Oxygen	2 C00704 + 2 C00080 <=> 1 C00027 + 1 C00007	1.15.1.1	NP4040A	NP4040A	Superoxide:superoxide oxidoreductase
R00286	1 UDPglucose + 1 H2O + 2 NAD+ <=> 1 UDPglucuronate + 2 NADH + 3 H+	1 C00029 + 1 C00001 + 2 C00003 <=> 1 C00167 + 2 C00004 + 3 C00080	1.1.1.22	NP2322A NP4668A	NP2322A v NP4668A	UDPglucose:NAD+ oxidoreductase
R00289	1 UTP + 1 D-Glucose 1-phosphate <=> 1 Pyrophosphate + 1 UDPglucose	1 C00075 + 1 C00103 <=> 1 C00013 + 1 C00029	2.7.7.9	NP4652A NP4656A NP4674A NP4680A NP2386A NP4276A		UTP:alpha-D-glucose-1-phosphate uridylyltransferase
R00291	1 UDPglucose <=> 1 UDP-D-galactose	1 C00029 <=> 1 C00052	5.1.3.2	NP3504A NP4112A NP4662A	NP3504A v NP4112A v NP4662A	UDPglucose 4-epimerase
R00303	1 H2O + 1 alpha-D-Glucose 6-phosphate => 1 D-Glucose + 1 Orthophosphate	1 C00001 + 1 C00668 => 1 C00031 + 1 C00009	3.1.3.9			D-Glucose-6-phosphate phosphohydrolase
R00316	1 ATP + 1 Acetate => 1 Pyrophosphate + 1 Acetyl adenylate	1 C00002 + 1 C00033 => 1 C00013 + 1 C05993	6.2.1.1	NP4240A NP4242A NP5128A NP5132A NP0164A		Acetate:CoA ligase (AMP-forming)
R00317	1 Acetyl phosphate + 1 H2O => 1 Acetate + 1 Orthophosphate + 1 H+	1 C00227 + 1 C00001 => 1 C00033 + 1 C00009 + 1 C00080	3.6.1.7	NP3750A	NP3750A	Acetyl phosphate phosphohydrolase
R00330	1 ATP + 1 GDP <=> 1 ADP + 1 GTP	1 C00002 + 1 C00035 <=> 1 C00008 + 1 C00044	2.7.4.6	NP3666A	NP3666A	ATP:nucleoside-diphosphate phosphatransferase
R00332	1 ATP + 1 GMP <=> 1 ADP + 1 GDP	1 C00002 + 1 C00144 <=> 1 C00008 + 1 C00035	2.7.4.8			ATP:(d)GMP phosphotransferase
R00342	1 (S)-Malate + 1 NAD+ <=> 1 Oxaloacetate + 1 NADH + 1 H+	1 C00149 + 1 C00003 <=> 1 C00036 + 1 C00004 + 1 C00080	1.1.1.37	NP0498A	NP0498A	(S)-Malate:NADP+ oxidoreductase
R00344	1 ATP + 1 Pyruvate + 1 HCO3- => 1 ADP + 1 Orthophosphate + 1 Oxaloacetate + 1 H+	1 C00002 + 1 C00022 + 1 C00288 => 1 C00008 + 1 C00009 + 1 C00036 + 1 C00080	6.4.1.1	NP4252A NP4368A	NP4252A ^ NP4368A	Pyruvate:carbon-dioxide ligase (ADP-forming)
R00351	1 Acetyl-CoA + 1 H2O + 1 Oxaloacetate => 1 Citrate + 1 CoA + 1 H+	1 C00024 + 1 C00001 + 1 C00036 => 1 C00158 + 1 C00010 + 1 C00080	2.3.3.1 2.3.3.3	NP1314A	NP1314A	Citrate oxaloacetate-lyase ((pro-3S)-CH2COO- -> acetyl-CoA)
R00354	1 Acetyl-CoA + 1 Oxaloacetate => 1 (3S)-Citryl-CoA	1 C00024 + 1 C00036 => 1 C00566	4.1.3.34	NP4244A	NP4244A	(3S)-Citryl-CoA oxaloacetate-lyase
R00355	1 L-Aspartate + 1 2-Oxoglutarate <=> 1 Oxaloacetate + 1 L-Glutamate	1 C00049 + 1 C00026 <=> 1 C00036 + 1 C00025	2.6.1.1	NP0824A NP1666A NP4024A NP4410A	NP0824A v NP1666A v NP4024A v NP4410A	L-Aspartate:2-oxoglutarate aminotransferase
R00357	1 L-Aspartate + 1 H2O + 1 Oxygen => 1 Oxaloacetate + 1 NH3 + 1 H2O2 + 1 H+	1 C00049 + 1 C00001 + 1 C00007 => 1 C00036 + 1 C00014 + 1 C00027 + 1 C00080	1.4.3.16	NP2416A	NP2416A	L-Aspartic acid:oxygen oxidoreductase (deaminating)
R00362	1 Citrate => 1 Acetate + 1 Oxaloacetate	1 C00158 => 1 C00033 + 1 C00036	4.1.3.6	NP4244A	NP4244A	Citrate oxaloacetate-lyase ((pro-3S)-CH2COO- -->acetate)
R00369	1 L-Alanine + 1 Glyoxylate => 1 Pyruvate + 1 Glycine	1 C00041 + 1 C00048 => 1 C00022 + 1 C00037	2.6.1.44	NP0884A NP2578A	NP0884A v NP2578A	L-Alanine:glyoxylate aminotransferase
R00405	1 ATP + 1 Succinate + 1 CoA <=> 1 ADP + 1 Orthophosphate + 1 Succinyl-CoA	1 C00002 + 1 C00042 + 1 C00010 <=> 1 C00008 + 1 C00009 + 1 C00091	6.2.1.5	NP4354A NP4356A	NP4354A ^ NP4356A	Succinate:CoA ligase (ADP-forming)
R00410	1 Succinyl-CoA + 1 Acetoacetate <=> 1 Succinate + 1 Acetoacetyl-CoA	1 C00091 + 1 C00164 <=> 1 C00042 + 1 C00332	2.8.3.5	NP6032A NP6034A	NP6032A ^ NP6034A	Succinyl-CoA:3-oxo-acid CoA-transferase
R00412	1 Succinate + 1 FAD <=> 1 Fumarate + 1 FADH2	1 C00042 + 1 C00016 <=> 1 C00122 + 1 C01352	1.3.99.1	NP4264A NP4266A NP4268A NP4270A	NP4264A ^ NP4266A ^ NP4268A ^ NP4270A	Succinate:(acceptor) oxidoreductase
R00425	1 GTP + 3 H2O => 1 Formate + 1 2,5-Diamino-6-hydroxy-4-(5'-phosphoribosylamino)-pyrimidine + 1 Pyrophosphate + 3 H+	1 C00044 + 3 C00001 => 1 C00058 + 1 C01304 + 1 C00013 + 3 C00080	3.5.4.25			GTP 7,8-8,9-dihydrolase (pyrophosphate-forming)
R00428	1 GTP + 1 H2O => 1 Formamidopyrimidine nucleoside triphosphate	1 C00044 + 1 C00001 => 1 C05922	3.5.4.16			GTP 7,8-8,9-dihydrolase
R00429	1 ATP + 1 GTP => 1 AMP + 1 Guanosine 3'-diphosphate 5'-triphosphate + 1 H+	1 C00002 + 1 C00044 => 1 C00020 + 1 C04494 + 1 C00080	2.7.6.5	NP3860A	NP3860A	ATP:GTP 3'-pyrophosphotransferase
R00430	1 GTP + 1 Pyruvate => 1 GDP + 1 Phosphoenolpyruvate + 1 H+	1 C00044 + 1 C00022 => 1 C00035 + 1 C00074 + 1 C00080	2.7.1.40	NP1746A	NP1746A	GTP:pyruvate O2-phosphotransferase
R00451	1 meso-2,6-Diaminoheptanedioate + 1 H+ <=> 1 L-Lysine + 1 CO2	1 C00680 + 1 C00080 <=> 1 C00047 + 1 C00011	4.1.1.20	NP1646A	NP1646A	meso-2,6-Diaminoheptanedioate carboxy-lyase
R00472	1 Acetyl-CoA + 1 H2O + 1 Glyoxylate => 1 (S)-Malate + 1 CoA + 1 H+	1 C00024 + 1 C00001 + 1 C00048 => 1 C00149 + 1 C00010 + 1 C00080	2.3.3.9	NP4430A	NP4430A	L-Malate glyoxylate-lyase (CoA-acetylating)
R00479	1 Isocitrate => 1 Succinate + 1 Glyoxylate	1 C00311 => 1 C00042 + 1 C00048	4.1.3.1	NP4432A	NP4432A
R00480	1 ATP + 1 L-Aspartate <=> 1 ADP + 1 4-Phospho-L-aspartate + 1 H+	1 C00002 + 1 C00049 <=> 1 C00008 + 1 C03082 + 1 C00080	2.7.2.4	NP0550A	NP0550A	ATP:L-aspartate 4-phosphotransferase
R00481	1 L-Aspartate + 1 Oxygen => 1 Iminoaspartate + 1 H2O2 + 1 H+	1 C00049 + 1 C00007 => 1 C05840 + 1 C00027 + 1 C00080	1.4.3.16	NP2416A	NP2416A
R00485	1 L-Asparagine + 1 H2O => 1 L-Aspartate + 1 NH3	1 C00152 + 1 C00001 => 1 C00049 + 1 C00014	3.5.1.1	NP2432A	NP2432A	L-Asparagine amidohydrolase
R00489	1 L-Aspartate + 1 H+ => 1 beta-Alanine + 1 CO2	1 C00049 + 1 C00080 => 1 C00099 + 1 C00011	4.1.1.15	NP1194A		L-Aspartate 1-carboxy-lyase
R00502	1 UTP + 1 alpha-D-Galactose 1-phosphate <=> 1 Pyrophosphate + 1 UDP-D-galactose	1 C00075 + 1 C00446 <=> 1 C00013 + 1 C00052	2.7.7.10	NP4652A NP4656A NP4674A NP4680A NP2386A NP4276A		UTP:alpha-D-hexose-1-phosphate uridylyltransferase
R00509	1 ATP + 1 Adenylylsulfate => 1 ADP + 1 3'-Phosphoadenylyl sulfate + 1 H+	1 C00002 + 1 C00224 => 1 C00008 + 1 C00053 + 1 C00080	2.7.1.25			ATP:adenylylsulfate 3'-phosphotransferase
R00511	1 CMP + 1 H2O => 1 Cytidine + 1 Orthophosphate	1 C00055 + 1 C00001 => 1 C00475 + 1 C00009	3.1.3.5	NP1854A NP2590A	NP1854A v NP2590A	Cytidine-5'-monophosphate phosphohydrolase
R00512	1 ATP + 1 CMP <=> 1 ADP + 1 CDP	1 C00002 + 1 C00055 <=> 1 C00008 + 1 C00112	2.7.4.14	NP4914A	NP4914A	ATP:CMP phosphotransferase
R00519	1 Formate + 1 NAD+ <=> 1 CO2 + 1 NADH	1 C00058 + 1 C00003 <=> 1 C00011 + 1 C00004	1.2.1.2	NP3710A NP4944A NP4946A NP4960A NP4962A
R00524	1 Formamide + 1 H2O => 1 Formate + 1 NH3 + 1 H+	1 C00488 + 1 C00001 => 1 C00058 + 1 C00014 + 1 C00080	3.5.1.49	NP6204A	NP6204A	Formamide amidohydrolase
R00529	1 ATP + 1 Sulfate <=> 1 Pyrophosphate + 1 Adenylylsulfate	1 C00002 + 1 C00059 <=> 1 C00013 + 1 C00224	2.7.7.4	NP4570A	NP4570A	ATP:sulfate adenylyltransferase
R00548	1 FMN + 1 H2O => 1 Riboflavin + 1 Orthophosphate	1 C00061 + 1 C00001 => 1 C00255 + 1 C00009	3.1.3.2	NP4208A	NP4208A	Riboflavin-5-phosphate phosphohydrolase (acid optimum)
R00549	1 ATP + 1 Riboflavin => 1 ADP + 1 FMN + 1 H+	1 C00002 + 1 C00255 => 1 C00008 + 1 C00061 + 1 C00080	2.7.1.26	NP0072A		ATP:riboflavin 5'-phosphotransferase
R00557	1 L-Arginine + 1 Oxygen + 1 NADPH => 1 Nitric oxide + 1 L-Citrulline + 1 NADP+ + 3 H+	1 C00062 + 1 C00007 + 1 C00005 => 1 C00533 + 1 C00327 + 1 C00006 + 3 C00080	1.14.13.39	NP1908A	NP1908A
R00566	1 L-Arginine + 1 H+ <=> 1 Agmatine + 1 CO2	1 C00062 + 1 C00080 <=> 1 C00179 + 1 C00011	4.1.1.19	NP4484A	NP4484A	L-Arginine carboxy-lyase
R00568	1 CTP + 1 H2O => 1 UTP + 1 NH3	1 C00063 + 1 C00001 => 1 C00075 + 1 C00014	3.5.4.13	NP5166A NP0954A	NP5166A v NP0954A	CTP aminohydrolase
R00570	1 ATP + 1 CDP <=> 1 ADP + 1 CTP	1 C00002 + 1 C00112 <=> 1 C00008 + 1 C00063	2.7.4.6	NP3666A	NP3666A	ATP:nucleoside-diphosphate phosphatransferase
R00571	1 ATP + 1 UTP + 1 NH3 => 1 ADP + 1 Orthophosphate + 1 CTP + 1 H+	1 C00002 + 1 C00075 + 1 C00014 => 1 C00008 + 1 C00009 + 1 C00063 + 1 C00080	6.3.4.2	NP1968A	NP1968A	UTP:ammonia ligase(ADP-forming)
R00573	1 ATP + 1 UTP + 1 L-Glutamine + 1 H2O => 1 ADP + 1 Orthophosphate + 1 CTP + 1 L-Glutamate + 2 H+	1 C00002 + 1 C00075 + 1 C00064 + 1 C00001 => 1 C00008 + 1 C00009 + 1 C00063 + 1 C00025 + 2 C00080	6.3.4.2	NP1968A	NP1968A	UTP:ammonia ligase(ADP-forming)
R00575	2 ATP + 1 L-Glutamine + 1 HCO3- + 1 H2O => 2 ADP + 1 Orthophosphate + 1 L-Glutamate + 1 Carbamoyl phosphate + 2 H+	2 C00002 + 1 C00064 + 1 C00288 + 1 C00001 => 2 C00008 + 1 C00009 + 1 C00025 + 1 C00169 + 2 C00080	6.3.5.5	NP4506A NP4830A	NP4506A ^ NP4830A	Carbon-dioxide:L-glutamine amido-ligase (ADP-forming, carbamate-phosphorylating)
R00578	1 ATP + 1 L-Aspartate + 1 L-Glutamine + 1 H2O => 1 AMP + 1 Pyrophosphate + 1 L-Asparagine + 1 L-Glutamate + 3 H+	1 C00002 + 1 C00049 + 1 C00064 + 1 C00001 => 1 C00020 + 1 C00013 + 1 C00152 + 1 C00025 + 3 C00080	6.3.5.4	NP2978A	NP2978A	L-aspartate:L-glutamine amido-ligase (AMP-forming)
R00582	1 O-Phospho-L-serine + 1 H2O => 1 L-Serine + 1 Orthophosphate	1 C01005 + 1 C00001 => 1 C00065 + 1 C00009	3.1.3.3	NP0274A	NP0274A	L-O-Phosphoserine phosphohydrolase
R00585	1 L-Serine + 1 Pyruvate + 1 H+ <=> 1 Hydroxypyruvate + 1 L-Alanine	1 C00065 + 1 C00022 + 1 C00080 <=> 1 C00168 + 1 C00041	2.6.1.51	NP0884A NP2578A	NP0884A v NP2578A	L-Serine:pyruvate aminotransferase
R00586	1 L-Serine + 1 Acetyl-CoA <=> 1 O-Acetyl-L-serine + 1 CoA	1 C00065 + 1 C00024 <=> 1 C00979 + 1 C00010	2.3.1.30	NP4172A	NP4172A
R00615	1 Thiamin diphosphate + 1 H2O => 1 Thiamin monophosphate + 1 Orthophosphate + 1 H+	1 C00068 + 1 C00001 => 1 C01081 + 1 C00009 + 1 C00080	3.6.1.15	NP4426A	NP4426A
R00617	1 ATP + 1 Thiamin monophosphate => 1 ADP + 1 Thiamin diphosphate	1 C00002 + 1 C01081 => 1 C00008 + 1 C00068	2.7.4.16	NP2280A	NP2280A
R00658	1 2-Phospho-D-glycerate <=> 1 Phosphoenolpyruvate + 1 H2O	1 C00631 <=> 1 C00074 + 1 C00001	4.2.1.11	NP2846A	NP2846A	2-Phospho-D-glucerate hydro-lyase
R00667	1 L-Ornithine + 1 2-Oxoglutarate <=> 1 L-Glutamate 5-semialdehyde + 1 L-Glutamate	1 C00077 + 1 C00026 <=> 1 C01165 + 1 C00025	2.6.1.13	NP5264A	NP5264A	L-Ornithine:2-oxo-acid aminotransferase
R00669	1 N-Acetylornithine + 1 H2O => 1 Acetate + 1 L-Ornithine	1 C00437 + 1 C00001 => 1 C00033 + 1 C00077	3.5.1.16	NP0200A NP5266A	NP0200A v NP5266A	N2-Acetyl-L-ornithine amidohydrolase
R00671	1 L-Ornithine => 1 L-Proline + 1 NH3 + 1 H+	1 C00077 => 1 C00148 + 1 C00014 + 1 C00080	4.3.1.12	NP0448A NP3802A	NP0448A v NP3802A	L-Ornithine ammonia-lyase(cyclizing)
R00674	1 L-Serine + 1 Indole + 1 H+ <=> 1 L-Tryptophan + 1 H2O	1 C00065 + 1 C00463 + 1 C00080 <=> 1 C00078 + 1 C00001	4.2.1.20	NP3162A NP3164A	NP3162A ^ NP3164A	L-Serine hydro-lyase (adding indoleglycerol-phosphate)
R00691	1 L-Arogenate + 1 H+ <=> 1 L-Phenylalanine + 1 H2O + 1 CO2	1 C00826 + 1 C00080 <=> 1 C00079 + 1 C00001 + 1 C00011	4.2.1.51	NP0106A	NP0106A	L-Arogenate hydro-lyase (decarboxylating)
R00694	1 L-Phenylalanine + 1 2-Oxoglutarate <=> 1 Phenylpyruvate + 1 L-Glutamate	1 C00079 + 1 C00026 <=> 1 C00166 + 1 C00025	2.6.1.9 2.6.1.1	NP0824A NP1666A NP2140A NP4024A NP4410A	NP0824A v NP1666A v NP2140A v NP4024A v NP4410A	L-Phenylalanine:2-oxoglutarate aminotransferase
R00698	1 L-Phenylalanine + 1 Oxygen <=> 1 2-Phenylacetamide + 1 CO2	1 C00079 + 1 C00007 <=> 1 C02505 + 1 C00011	1.11.1.7	NP2708A	NP2708A	Donor:hydrogen-peroxide oxidoreductase
R00702	2 trans,trans-Farnesyl diphosphate => 1 Pyrophosphate + 1 Presqualene diphosphate + 1 H+	2 C00448 => 1 C00013 + 1 C03428 + 1 C00080	2.5.1.21	NP4556A NP0604A		Farnesyl-diphosphate:farnesyl-diphosphate farnesyltransferase
R00704	1 (R)-Lactate + 1 NAD+ <=> 1 Pyruvate + 1 NADH + 1 H+	1 C00256 + 1 C00003 <=> 1 C00022 + 1 C00004 + 1 C00080	1.1.1.28	NP3764A	NP3764A	(R)-Lactate:NAD+ oxidoreductase
R00705	1 3-Oxopropanoate + 1 CoA + 1 NAD+ + 1 H+ => 1 Acetyl-CoA + 1 CO2 + 1 NADH + 1 H+	1 C00222 + 1 C00010 + 1 C00003 + 1 C00080 => 1 C00024 + 1 C00011 + 1 C00004 + 1 C00080	1.2.1.18	NP1686A NP3020A		3-Oxopropanoate:NAD+ oxidoreductase (decarboxylating, CoA-acetylating)
R00707	1 (S)-1-Pyrroline-5-carboxylate + 1 NAD+ + 2 H2O => 1 L-Glutamate + 1 NADH + 1 H+	1 C03912 + 1 C00003 + 2 C00001 => 1 C00025 + 1 C00004 + 1 C00080	1.5.1.12	NP3020A NP1686A		L-1-Pyrroline-5-carboxylate:NAD+ oxidoreductase
R00708	1 (S)-1-Pyrroline-5-carboxylate + 1 NADP+ + 2 H2O => 1 L-Glutamate + 1 NADPH + 1 H+	1 C03912 + 1 C00006 + 2 C00001 => 1 C00025 + 1 C00005 + 1 C00080	1.5.1.12	NP3020A NP1686A		L-1-Pyrroline-5-carboxylate:NAD+ oxidoreductase
R00710	1 Acetaldehyde + 1 NAD+ + 1 H2O => 1 Acetate + 1 NADH + 2 H+	1 C00084 + 1 C00003 + 1 C00001 => 1 C00033 + 1 C00004 + 2 C00080	1.2.1.3	NP1686A NP3020A		Acetaldehyde:NAD+ oxidoreductase
R00713	1 Succinate semialdehyde + 1 NAD+ + 1 H2O => 1 Succinate + 1 NADH + 2 H+	1 C00232 + 1 C00003 + 1 C00001 => 1 C00042 + 1 C00004 + 2 C00080	1.2.1.16 1.2.1.24	NP3020A NP1686A		Succinate-semialdehyde:NAD+ oxidoreductase
R00714	1 Succinate semialdehyde + 1 NADP+ + 1 H2O => 1 Succinate + 1 NADPH + 2 H+	1 C00232 + 1 C00006 + 1 C00001 => 1 C00042 + 1 C00005 + 2 C00080	1.2.1.16	NP3020A NP1686A		Succinate-semialdehyde:NADP+ oxidoreductase
R00722	1 ATP + 1 IDP <=> 1 ADP + 1 ITP	1 C00002 + 1 C00104 <=> 1 C00008 + 1 C00081	2.7.4.6	NP3666A	NP3666A	ATP:nucleoside-diphosphate phosphatransferase
R00734	1 L-Tyrosine + 1 2-Oxoglutarate <=> 1 3-(4-Hydroxyphenyl)pyruvate + 1 L-Glutamate	1 C00082 + 1 C00026 <=> 1 C01179 + 1 C00025	2.6.1.9 2.6.1.1	NP0824A NP1666A NP2140A NP4024A NP4410A	NP0824A v NP1666A v NP2140A v NP4024A v NP4410A	L-Tyrosine:2-oxoglutarate aminotransferase
R00736	1 L-Tyrosine + 1 H+ => 1 Tyramine + 1 CO2	1 C00082 + 1 C00080 => 1 C00483 + 1 C00011	4.1.1.25	NP1194A	NP1194A
R00754	1 Ethanol + 1 NAD+ <=> 1 Acetaldehyde + 1 NADH + 1 H+	1 C00469 + 1 C00003 <=> 1 C00084 + 1 C00004 + 1 C00080	1.1.1.1	NP1260A		Ethanol:NAD+ oxidoreductase
R00768	1 L-Glutamine + 1 D-Fructose 6-phosphate => 1 L-Glutamate + 1 D-Glucosamine 6-phosphate + 1 H+	1 C00064 + 1 C00085 => 1 C00025 + 1 C00352 + 1 C00080	2.6.1.16	NP2384A NP4654A	NP2384A v NP4654A	L-Glutamine:D-fructose-6-phosphate aminotransferase (hexose isomerizing)
R00782	1 L-Cysteine + 1 H2O => 1 Hydrogen sulfide + 1 Pyruvate + 1 NH3 + 2 H+	1 C00097 + 1 C00001 => 1 C00283 + 1 C00022 + 1 C00014 + 2 C00080	4.4.1.1 4.4.1.8	NP4746A	NP4746A
R00783	1 Nitrite + 1 Ferrocytochrome c + 1 H+ => 1 Nitric oxide + 1 H2O + 1 Ferricytochrome c	1 C00088 + 1 C00126 + 1 C00080 => 1 C00533 + 1 C00001 + 1 C00125	1.7.2.1	NP1598A	NP1598A	Ferrocytochrome-c:oxygen oxidoreductase
R00790	1 Nitrite + 6 Reduced ferredoxin + 1 H+ => 1 NH3 + 2 H2O + 6 Oxidized ferredoxin	1 C00088 + 6 C00138 + 1 C00080 => 1 C00014 + 2 C00001 + 6 C00139	1.7.7.1	NP4224A	NP4224A	Ammonia:ferredoxin oxidoreductase
R00833	1 (R)-2-Methyl-3-oxopropanoyl-CoA <=> 1 Succinyl-CoA	1 C01213 <=> 1 C00091	5.4.99.2	NP1226A NP2320A NP2710A	NP1226A ^ NP2320A ^ NP2710A	(R)-2-Methyl-3-oxopropanoyl-CoA CoA-carbonylmutase
R00859	1 Sulfite + 6 Reduced ferredoxin + 1 H+ => 1 Hydrogen sulfide + 3 H2O + 6 Oxidized ferredoxin	1 C00094 + 6 C00138 + 1 C00080 => 1 C00283 + 3 C00001 + 6 C00139	1.8.7.1	NP4004A NP1146A	NP4004A v NP1146A
R00866	1 ATP + 1 D-Fructose => 1 ADP + 1 D-Fructose 1-phosphate + 1 H+	1 C00002 + 1 C00095 => 1 C00008 + 1 C01094 + 1 C00080	2.7.1.3	NP3184A		ATP:D-fructose 1-phosphotransferase
R00867	1 ATP + 1 D-Fructose => 1 ADP + 1 D-Fructose 6-phosphate + 1 H+	1 C00002 + 1 C00095 => 1 C00008 + 1 C00085 + 1 C00080	2.7.1.1 2.7.1.4	NP3184A		ATP:D-fructose 6-phosphotransferase
R00897	1 O-Acetyl-L-serine + 1 Hydrogen sulfide + 1 H+ => 1 L-Cysteine + 1 Acetate	1 C00979 + 1 C00283 + 1 C00080 => 1 C00097 + 1 C00033	2.5.1.47	NP3116A NP4748A	NP3116A v NP4748A	O3-Acetyl-L-serine acetate-lyase (adding hydrogen sulfide)
R00908	1 beta-Alanine + 1 2-Oxoglutarate => 1 3-Oxopropanoate + 1 L-Glutamate	1 C00099 + 1 C00026 => 1 C00222 + 1 C00025	2.6.1.19	NP6188A	NP6188A	3-Aminopropanoate:2-oxoglutarate aminotransferase
R00920	1 ATP + 1 Propanoate + 1 CoA => 1 ADP + 1 Orthophosphate + 1 Propanoyl-CoA	1 C00002 + 1 C00163 + 1 C00010 => 1 C00008 + 1 C00009 + 1 C00100	6.2.1.13	NP2858A		Propanoate:CoA ligase (ADP-forming)
R00923	1 (S)-2-Methyl-3-oxopropanoyl-CoA + 1 H+ => 1 Propanoyl-CoA + 1 CO2	1 C00683 + 1 C00080 => 1 C00100 + 1 C00011	4.1.1.41			(S)-2-Methyl-3-oxopropanoyl-CoA carboxy-lyase
R00924	1 Propanoyl-CoA + 1 FAD <=> 1 FADH2 + 1 Propenoyl-CoA	1 C00100 + 1 C00016 <=> 1 C01352 + 1 C00894	1.3.99.3	NP1596A NP1754A NP1870A NP2620A NP2628A NP2934A NP3004A NP3460A NP4050A NP4214A NP4254A NP6180A	NP1596A v NP1754A v NP1870A v NP2620A v NP2628A v NP2934A v NP3004A v NP3460A v NP4050A v NP4214A v NP4254A v NP6180A	Propanoyl-CoA:(acceptor) 2,3-oxidoreductase
R00926	1 Propinol adenylate + 1 CoA <=> 1 AMP + 1 Propanoyl-CoA + 1 H+	1 C05983 + 1 C00010 <=> 1 C00020 + 1 C00100 + 1 C00080	6.2.1.1	NP4240A NP4242A NP5128A NP5132A NP0164A		Propinol adenylate:CoA ligase (AMP-forming)
R00927	1 CoA + 1 2-Methylacetoacetyl-CoA => 1 Propanoyl-CoA + 1 Acetyl-CoA	1 C00010 + 1 C03344 => 1 C00100 + 1 C00024	2.3.1.16	NP2214A NP2260A NP2606A NP2612A NP3420A NP3438A NP3650A NP4580A
R00935	1 (S)-Methylmalonate semialdehyde + 1 CoA + 1 NAD+ => 1 Propanoyl-CoA + 1 CO2 + 1 NADH	1 C06002 + 1 C00010 + 1 C00003 => 1 C00100 + 1 C00011 + 1 C00004	1.2.1.27	NP1686A NP3020A		(S)-Methylmalonate semialdehyde:NAD+ oxidoreductase (CoA-propanoylating)
R00939	1 Dihydrofolate + 1 NADPH + 1 H+ => 1 Tetrahydrofolate + 1 NADP+	1 C00415 + 1 C00005 + 1 C00080 => 1 C00101 + 1 C00006	1.5.1.3	NP2922A	NP2922A	5,6,7,8-Tetrahydrofolate:NADP+ oxidoreductase
R00942	1 ATP + 1 Tetrahydrofolate + 1 L-Glutamate <=> 1 ADP + 1 Orthophosphate + 1 Tetrahydrofolyl-[Glu](2) + 1 H+	1 C00002 + 1 C00101 + 1 C00025 <=> 1 C00008 + 1 C00009 + 1 C09332 + 1 C00080	6.3.2.17	NP1478A	NP1478A
R00944	1 10-Formyltetrahydrofolate + 1 H2O => 1 Formate + 1 Tetrahydrofolate + 1 H+	1 C00234 + 1 C00001 => 1 C00058 + 1 C00101 + 1 C00080	3.5.1.10	NP5006A	NP5006A
R00945	1 Tetrahydrofolate + 1 L-Serine + 1 H+ => 1 5,10-Methylenetetrahydrofolate + 1 Glycine + 1 H2O	1 C00101 + 1 C00065 + 1 C00080 => 1 C00143 + 1 C00037 + 1 C00001	2.1.2.1	NP2050A	NP2050A	5,10-Methylenetetrahydrofolate:glycine hydroxymethyltransferase
R00955	1 UDPglucose + 1 alpha-D-Galactose 1-phosphate <=> 1 D-Glucose 1-phosphate + 1 UDP-D-galactose	1 C00029 + 1 C00446 <=> 1 C00103 + 1 C00052	2.7.7.12	NP4652A NP4656A NP4674A NP4680A NP2386A NP4276A		UDPglucose:alpha-D-galactose-1-phosphate uridylyltransferase
R00959	1 D-Glucose 1-phosphate <=> 1 alpha-D-Glucose 6-phosphate	1 C00103 <=> 1 C00668	5.4.2.2	NP4660A NP4676A NP5158A NP3514A	NP4660A v NP4676A v NP5158A v NP3514A	alpha-D-Glucose 1-phosphate 1,6-phosphomutase
R00963	1 UMP + 1 H2O => 1 Uridine + 1 Orthophosphate	1 C00105 + 1 C00001 => 1 C00299 + 1 C00009	3.1.3.5	NP1854A NP2590A	NP1854A v NP2590A	Uridine 5'-monophosphate phosphohydrolase
R00965	1 Orotidine 5'-phosphate + 1 H+ => 1 UMP + 1 CO2	1 C01103 + 1 C00080 => 1 C00105 + 1 C00011	4.1.1.23	NP1734A	NP1734A	Orotidine-5'-phosphate carboxy-lyase
R00966	1 UMP + 1 Pyrophosphate + 1 H+ => 1 Uracil + 1 5-Phospho-alpha-D-ribose 1-diphosphate	1 C00105 + 1 C00013 + 1 C00080 => 1 C00106 + 1 C00119	2.4.2.9	NP1408A	NP1408A	UMP:pyrophosphate phosphoribosyltransferase
R00985	1 Chorismate + 1 NH3 <=> 1 Anthranilate + 1 Pyruvate + 1 H2O	1 C00251 + 1 C00014 <=> 1 C00108 + 1 C00022 + 1 C00001	4.1.3.27	NP3342A NP3344A	NP3342A ^ NP3344A	Chorismate pyruvate-lyase (amino-accepting)
R00986	1 Chorismate + 1 L-Glutamine <=> 1 Anthranilate + 1 Pyruvate + 1 L-Glutamate + 1 H+	1 C00251 + 1 C00064 <=> 1 C00108 + 1 C00022 + 1 C00025 + 1 C00080	4.1.3.27	NP3342A NP3344A	NP3342A ^ NP3344A	Chorismate pyruvate-lyase (amino-accepting)
R00994	1 D-erythro-3-Methylmalate + 1 NAD+ => 1 2-Oxobutanoate + 1 CO2 + 1 NADH	1 C06032 + 1 C00003 => 1 C00109 + 1 C00011 + 1 C00004		NP2190A	NP2190A	LeuB
R00996	1 L-Threonine => 1 2-Oxobutanoate + 1 NH3 + 1 H+	1 C00188 => 1 C00109 + 1 C00014 + 1 C00080	4.3.1.19	NP1076A	NP1076A	L-threonine ammonia-lyase
R00999	1 O-Succinyl-L-homoserine + 1 H2O => 1 2-Oxobutanoate + 1 Succinate + 1 NH3 + 2 H+	1 C01118 + 1 C00001 => 1 C00109 + 1 C00042 + 1 C00014 + 2 C00080	2.5.1.48	NP4746A	NP4746A	O-Succinyl-L-homoserine succinate-lyase (adding cysteine)
R01001	1 L-Cysteine + 1 NH3 + 1 2-Oxobutanoate + 1 H+ => 1 L-Cystathionine + 1 H2O	1 C00097 + 1 C00014 + 1 C00109 + 1 C00080 => 1 C02291 + 1 C00001	4.4.1.1	NP4746A	NP4746A	L-Cystathionine Lysteine-lyase (deaminating)
R01015	1 D-Glyceraldehyde 3-phosphate <=> 1 Glycerone phosphate	1 C00118 <=> 1 C00111	5.3.1.1	NP2182A NP3716A	NP2182A v NP3716A	D-Glyceraldehyde-3-phosphate ketol-isomerase
R01049	1 ATP + 1 D-Ribose 5-phosphate <=> 1 AMP + 1 5-Phospho-alpha-D-ribose 1-diphosphate + 1 H+	1 C00002 + 1 C00117 <=> 1 C00020 + 1 C00119 + 1 C00080	2.7.6.1	NP0606A	NP0606A	ATP:D-ribose-5-phosphate pyrophosphotransferase
R01051	1 ATP + 1 D-Ribose => 1 ADP + 1 D-Ribose 5-phosphate + 1 H+	1 C00002 + 1 C00121 => 1 C00008 + 1 C00117 + 1 C00080	2.7.1.15	NP3184A		ATP:D-ribose 5-phosphotransferase
R01054	1 ADPribose + 1 H2O => 1 AMP + 1 D-Ribose 5-phosphate + 2 H+	1 C00301 + 1 C00001 => 1 C00020 + 1 C00117 + 2 C00080	3.6.1.13	NP0392A	NP0392A	ADPribose ribophosphohydrolase
R01056	1 D-Ribose 5-phosphate <=> 1 D-Ribulose 5-phosphate	1 C00117 <=> 1 C00199	5.3.1.6	NP0786A	NP0786A	D-Ribose-5-phosphate ketol-isomerase
R01057	1 D-Ribose 1-phosphate <=> 1 D-Ribose 5-phosphate	1 C00620 <=> 1 C00117	5.4.2.2	NP4660A NP4676A NP5158A NP3514A		D-Ribose 1,5-phosphomutase
R01063	1 D-Glyceraldehyde 3-phosphate + 1 Orthophosphate + 1 NADP+ <=> 1 3-Phospho-D-glyceroyl phosphate + 1 NADPH + 1 H+	1 C00118 + 1 C00009 + 1 C00006 <=> 1 C00236 + 1 C00005 + 1 C00080	1.2.1.59	NP0012A	NP0012A	D-Glyceraldehyde-3-phosphate:NADP+ oxidoreductase(phosphorylating)
R01066	1 2-Deoxy-D-ribose 5-phosphate <=> 1 D-Glyceraldehyde 3-phosphate + 1 Acetaldehyde	1 C00673 <=> 1 C00118 + 1 C00084	4.1.2.4	NP3200A	NP3200A	2-Deoxy-D-ribose-5-phosphate acetaldehyde-lyase
R01070	1 D-Fructose 1,6-bisphosphate <=> 1 Glycerone phosphate + 1 D-Glyceraldehyde 3-phosphate	1 C00354 <=> 1 C00111 + 1 C00118	4.1.2.13	NP1594A	NP1594A	beta-D-Fructose 1,6-bisphosphate D-glyceraldehyde-3-phosphate-lyase
R01071	1 Phosphoribosyl-ATP + 1 Pyrophosphate + 1 H+ <=> 1 ATP + 1 5-Phospho-alpha-D-ribose 1-diphosphate	1 C02739 + 1 C00013 + 1 C00080 <=> 1 C00002 + 1 C00119	2.4.2.17	NP1062A	NP1062A	1-(5-Phospho-D-ribosyl)-ATP:pyrophosphate phosphoribosyl-transferase
R01072	1 L-Glutamine + 1 5-Phospho-alpha-D-ribose 1-diphosphate + 1 H2O => 1 5-Phosphoribosylamine + 1 Pyrophosphate + 1 L-Glutamate + 2 H+	1 C00064 + 1 C00119 + 1 C00001 => 1 C03090 + 1 C00013 + 1 C00025 + 2 C00080	2.4.2.14	NP4312A	NP4312A	5-Phosphoribosylamine:pyrophosphate phosphoribosyltransferase (glutamate-amidating)
R01073	1 N-(5-Phospho-D-ribosyl)anthranilate + 1 Pyrophosphate + 1 H+ <=> 1 Anthranilate + 1 5-Phospho-alpha-D-ribose 1-diphosphate	1 C04302 + 1 C00013 + 1 C00080 <=> 1 C00108 + 1 C00119	2.4.2.18	NP0532A NP3062A NP3338A	NP0532A v NP3062A v NP3338A	N-(5-Phospho-D-ribosyl)anthranilate:pyrophosphate phosphoribosyl-transferase
R01082	1 Fumarate + 1 H2O <=> 1 (S)-Malate	1 C00122 + 1 C00001 <=> 1 C00149	4.2.1.2	NP3778A	NP3778A	(S)-Malate hydro-lyase
R01083	1 N6-(1,2-Dicarboxyethyl)-AMP <=> 1 Fumarate + 1 AMP	1 C03794 <=> 1 C00122 + 1 C00020	4.3.2.2	NP1658A	NP1658A	N6-(1,2-Dicarboxyethyl)AMP AMP-lyase
R01086	1 N-(L-Arginino)succinate <=> 1 Fumarate + 1 L-Arginine	1 C03406 <=> 1 C00122 + 1 C00062	4.3.2.1	NP5254A	NP5254A	N-(L-Argininosuccinate) arginie-lyase
R01090	1 L-Leucine + 1 2-Oxoglutarate <=> 1 4-Methyl-2-oxopentanoate + 1 L-Glutamate	1 C00123 + 1 C00026 <=> 1 C00233 + 1 C00025	2.6.1.42	NP5036A	NP5036A	L-Leucine:2-oxoglutarate aminotransferase
R01106	1 Nitrate + 2 Ferrocytochrome c => 1 Nitrite + 2 Ferricytochrome c + 1 H2O	1 C00244 + 2 C00126 => 1 C00088 + 2 C00125 + 1 C00001	1.7.99.4	NP1244A NP4226A NP2584A	(NP1244A ^ NP2584A) v (NP4226A ^ NP2584A)	Nitrite:(acceptor) oxidoreductase
R01123	1 Isopentenyl diphosphate <=> 1 Dimethylallyl diphosphate	1 C00129 <=> 1 C00235	5.3.3.2	NP4826A NP5124A NP0360A	NP4826A v NP5124A v NP0360A	Isopentenyl-diphosphate delta3-delta2-isomerase
R01126	1 IMP + 1 H2O => 1 Inosine + 1 Orthophosphate	1 C00130 + 1 C00001 => 1 C00294 + 1 C00009	3.1.3.5	NP2590A NP1854A	NP2590A v NP1854A	Inosine 5'-monophosphate phosphohydrolase
R01127	1 IMP + 1 H2O + 1 H+ <=> 1 1-(5'-Phosphoribosyl)-5-formamido-4-imidazolecarboxamide	1 C00130 + 1 C00001 + 1 C00080 <=> 1 C04734	3.5.4.10	NP0732A	NP0732A	IMP 1,2-hydrolase (decyclizing)
R01130	1 IMP + 1 NAD+ + 1 H2O => 1 Xanthosine 5'-phosphate + 1 NADH + 1 H+	1 C00130 + 1 C00003 + 1 C00001 => 1 C00655 + 1 C00004 + 1 C00080	1.1.1.205	NP3384A NP3080A	NP3384A v NP3080A	IMP:NAD+ oxidoreductase
R01134	1 IMP + 1 NH3 + 1 NADP+ <=> 1 GMP + 1 NADPH	1 C00130 + 1 C00014 + 1 C00006 <=> 1 C00144 + 1 C00005	1.7.1.7	NP3080A	NP3080A	NADH:guanosine-5'-phosphate oxidoreductase(deaminating)
R01135	1 GTP + 1 IMP + 1 L-Aspartate => 1 GDP + 1 Orthophosphate + 1 N6-(1,2-Dicarboxyethyl)-AMP + 1 H+	1 C00044 + 1 C00130 + 1 C00049 => 1 C00035 + 1 C00009 + 1 C03794 + 1 C00080	6.3.4.4	NP1530A	NP1530A	IMP:L-aspartate ligase (GDP-forming)
R01137	1 ATP + 1 dADP <=> 1 ADP + 1 dATP	1 C00002 + 1 C00206 <=> 1 C00008 + 1 C00131	2.7.4.6	NP3666A	NP3666A	ATP:nucleoside-diphosphate phosphatransferase
R01138	1 dATP + 1 Pyruvate => 1 dADP + 1 Phosphoenolpyruvate + 1 H+	1 C00131 + 1 C00022 => 1 C00206 + 1 C00074 + 1 C00080	2.7.1.40	NP1746A	NP1746A	dATP:pyruvate O2-phosphotransferase
R01157	1 Agmatine + 1 H2O <=> 1 Putrescine + 1 Urea	1 C00179 + 1 C00001 <=> 1 C00134 + 1 C00086	3.5.3.11	NP3022A NP4754A	NP3022A v NP4754A	Agmatine amidinohydrolase
R01163	1 L-Histidinal + 1 H2O + 2 NAD+ <=> 1 L-Histidine + 2 NADH	1 C01929 + 1 C00001 + 2 C00003 <=> 1 C00135 + 2 C00004	1.1.1.23	NP2876A	NP2876A	L-Histidinal:NAD+ oxidoreductase
R01175	1 Butanoyl-CoA + 1 FAD => 1 FADH2 + 1 Crotonoyl-CoA	1 C00136 + 1 C00016 => 1 C01352 + 1 C00877	1.3.99.3	NP1596A NP1754A NP1870A NP2620A NP2628A NP2934A NP3004A NP3460A NP4050A NP4214A NP4254A NP6180A	NP1596A v NP1754A v NP1870A v NP2620A v NP2628A v NP2934A v NP3004A v NP3460A v NP4050A v NP4214A v NP4254A v NP6180A	Butanoyl-CoA:oxygen 2-oxidoreductase
R01177	1 Acetyl-CoA + 1 Butanoyl-CoA <=> 1 CoA + 1 3-Oxohexanoyl-CoA	1 C00024 + 1 C00136 <=> 1 C00010 + 1 C05269	2.3.1.16	NP2214A NP2260A NP2606A NP2612A NP3420A NP3438A NP3650A NP4580A	NP2214A v NP2260A v NP2606A v NP2612A v NP3420A v NP3438A v NP3650A v NP4580A	Acetyl-CoA:acetyl-CoA C-acetyltransferase
R01196	1 Oxidized ferredoxin + 1 Pyruvate + 1 CoA <=> 1 Reduced ferredoxin + 1 Acetyl-CoA + 1 CO2	1 C00139 + 1 C00022 + 1 C00010 <=> 1 C00138 + 1 C00024 + 1 C00011	1.2.7.1	NP4044A NP4046A	NP4044A ^ NP4046
R01197	1 Oxidized ferredoxin + 1 2-Oxoglutarate + 1 CoA <=> 1 Reduced ferredoxin + 1 Succinyl-CoA + 1 CO2	1 C00139 + 1 C00026 + 1 C00010 <=> 1 C00138 + 1 C00091 + 1 C00011	1.2.7.3	NP1232A NP1234A NP3012A	NP1232A ^ NP1234A
R01213	1 Acetyl-CoA + 1 3-Methyl-2-oxobutanoic acid + 1 H2O => 1 2-Isopropylmalate + 1 CoA + 1 H+	1 C00024 + 1 C00141 + 1 C00001 => 1 C02504 + 1 C00010 + 1 C00080	2.3.3.13	NP0624A NP2206A NP2994A	NP0624A v NP2994A	3-Carboxy-3-hydroxy-4-methylpentanoate 3-methyl-2-oxobutanoate-lyase (CoA-acetylating)
R01214	1 L-Valine + 1 2-Oxoglutarate <=> 1 3-Methyl-2-oxobutanoic acid + 1 L-Glutamate	1 C00183 + 1 C00026 <=> 1 C00141 + 1 C00025	2.6.1.42	NP5036A	NP5036A	L-Valine:2-oxoglutarate aminotransferase
R01220	1 5,10-Methylenetetrahydrofolate + 1 NADP+ <=> 1 5,10-Methenyltetrahydrofolate + 1 NADPH	1 C00143 + 1 C00006 <=> 1 C00445 + 1 C00005	1.5.1.5	NP2054A	NP2054A
R01221	1 5,10-Methylenetetrahydrofolate + 1 NH3 + 1 CO2 + 1 NADH + 1 H+ <=> 1 Glycine + 1 Tetrahydrofolate + 1 NAD+	1 C00143 + 1 C00014 + 1 C00011 + 1 C00004 + 1 C00080 <=> 1 C00037 + 1 C00101 + 1 C00003	2.1.2.10	NP4774A	NP4774A	glycine synthase
R01226	1 5,10-Methylenetetrahydrofolate + 1 3-Methyl-2-oxobutanoic acid + 1 H2O => 1 Tetrahydrofolate + 1 2-Dehydropantoate	1 C00143 + 1 C00141 + 1 C00001 => 1 C00101 + 1 C00966	2.1.2.11	NP4334A	NP4334A	5,10-Methylenetetrahydrofolate:3-methyl-2-oxobutanoate hydroxymethyltransferase
R01227	1 GMP + 1 H2O => 1 Guanosine + 1 Orthophosphate	1 C00144 + 1 C00001 => 1 C00387 + 1 C00009	3.1.3.5	NP1854A NP2590A	NP1854A v NP2590A	Guanosine 5'-monophosphate phosphohydrolase
R01229	1 Guanine + 1 5-Phospho-alpha-D-ribose 1-diphosphate => 1 GMP + 1 Pyrophosphate + 1 H+	1 C00242 + 1 C00119 => 1 C00144 + 1 C00013 + 1 C00080	2.4.2.7 2.4.2.22	NP1426A NP1254A	NP1426A v NP1254A	GMP:pyrophosphate phosphoribosyltransferase
R01231	1 ATP + 1 Xanthosine 5'-phosphate + 1 L-Glutamine + 1 H2O => 1 AMP + 1 Pyrophosphate + 1 GMP + 1 L-Glutamate + 2 H+	1 C00002 + 1 C00655 + 1 C00064 + 1 C00001 => 1 C00020 + 1 C00013 + 1 C00144 + 1 C00025 + 2 C00080	6.3.5.2	NP0620A NP1970A NP0794A NP2928A NP6256A	(NP0620A ^ NP1970A) v (NP0794A ^ NP1970A) v (NP2928A ^ NP1970A) v (NP6256A ^ NP1970A)	Xanthosine-5'-phosphate:L-glutamine amido-ligase (AMP-forming)
R01244	1 Adenine + 1 H2O => 1 Hypoxanthine + 1 NH3 + 1 H+	1 C00147 + 1 C00001 => 1 C00262 + 1 C00014 + 1 C00080	3.5.4.2	NP0972A NP2032A NP4788A	NP0972A v NP2032A v NP4788A	Adenine aminohydrolase
R01248	1 (S)-1-Pyrroline-5-carboxylate + 1 NADH + 2 H+ <=> 1 L-Proline + 1 NAD+	1 C03912 + 1 C00004 + 2 C00080 <=> 1 C00148 + 1 C00003	1.5.1.2	NP3974A	NP3974A	L-Proline:NAD+ 5-oxidoreductase
R01251	1 (S)-1-Pyrroline-5-carboxylate + 1 NADPH + 2 H+ <=> 1 L-Proline + 1 NADP+	1 C03912 + 1 C00005 + 2 C00080 <=> 1 C00148 + 1 C00006	1.5.1.2	NP3974A	NP3974A	L-Proline:NADP+ 5-oxidoreductase
R01279	1 Palmitoyl-CoA + 1 FAD => 1 trans-Hexadec-2-enoyl-CoA + 1 FADH2	1 C00154 + 1 C00016 => 1 C05272 + 1 C01352	1.3.99.3	NP1596A NP1754A NP1870A NP2620A NP2628A NP2934A NP3004A NP3460A NP4050A NP4214A NP4254A NP6180A	NP1596A v NP1754A v NP1870A v NP2620A v NP2628A v NP2934A v NP3004A v NP3460A v NP4050A v NP4214A v NP4254A v NP6180A	Palmitoyl-CoA:oxygen 2-oxidoreductase
R01280	1 ATP + 1 Hexadecanoic acid + 1 CoA <=> 1 AMP + 1 Palmitoyl-CoA + 1 Pyrophosphate + 1 H+	1 C00002 + 1 C00249 + 1 C00010 <=> 1 C00020 + 1 C00154 + 1 C00013 + 1 C00080	6.2.1.3	NP2626A NP3386A NP3422A NP4150A NP4174A NP4256A	NP2626A v NP3386A v NP3422A v NP4150A v NP4174A v NP4256A	Palmitate:CoA ligase (AMP-forming)
R01285	1 Cystathionine + 1 H2O => 1 L-Homocysteine + 1 NH3 + 1 Pyruvate + 1 H+	1 C00542 + 1 C00001 => 1 C00155 + 1 C00014 + 1 C00022 + 1 C00080	4.4.1.8	NP4746A	NP4746A	Cystathionine L-homocysteine-lyase (deaminating)
R01286	1 L-Cystathionine + 1 H2O => 1 L-Homocysteine + 1 NH3 + 1 Pyruvate + 1 H+	1 C02291 + 1 C00001 => 1 C00155 + 1 C00014 + 1 C00022 + 1 C00080	4.4.1.8	NP4746A	NP4746A	L-Cystathionine L-homocysteine-lyase (deaminating)
R01287	1 O-Acetyl-L-homoserine + 1 Hydrogen sulfide => 1 L-Homocysteine + 1 Acetate	1 C01077 + 1 C00283 => 1 C00155 + 1 C00033	2.5.1.49	NP0280A NP0284A	NP0280A v NP0284A	O-Acetyl-L-homoserine acetate-lyase (adding methanethiol)
R01288	1 O-Succinyl-L-homoserine + 1 Hydrogen sulfide => 1 L-Homocysteine + 1 Succinate	1 C01118 + 1 C00283 => 1 C00155 + 1 C00042	2.5.1.48	NP4746A	NP4746A	O-Succinyl-L-homoserine succinate-lyase (adding cysteine)
R01290	1 L-Serine + 1 L-Homocysteine + 1 H+ => 1 L-Cystathionine + 1 H2O	1 C00065 + 1 C00155 + 1 C00080 => 1 C02291 + 1 C00001	4.2.1.22	NP3116A NP4748A	NP3116A v NP4748A	L-Serine hydro-lyase (adding homocysteine)
R01325	1 Citrate <=> 1 cis-Aconitate + 1 H2O	1 C00158 <=> 1 C00417 + 1 C00001	4.2.1.3	NP0404A NP1994A	NP0404A v NP1994A	Citrate hydro-lyase
R01326	1 ATP + 1 D-Mannose <=> 1 ADP + 1 D-Mannose 6-phosphate + 1 H+	1 C00002 + 1 C00159 <=> 1 C00008 + 1 C00275 + 1 C00080	2.7.1.1 2.7.1.7	NP3184A		ATP:D-glucose 6-phosphotransferase
R01354	1 ATP + 1 Propanoate => 1 Pyrophosphate + 1 Propinol adenylate	1 C00002 + 1 C00163 => 1 C00013 + 1 C05983	6.2.1.1	NP4240A NP4242A NP5128A NP5132A NP0164A		Propanoate:CoA ligase (AMP-forming)
R01373	1 Prephenate + 1 H+ <=> 1 Phenylpyruvate + 1 H2O + 1 CO2	1 C00254 + 1 C00080 <=> 1 C00166 + 1 C00001 + 1 C00011	4.2.1.51	NP0106A	NP0106A	Prephenate hydro-lyase (decarboxylating)
R01385	1 UDPglucuronate <=> 1 UDP-D-galacturonate	1 C00167 <=> 1 C00617	5.1.3.6	NP4662A NP3504A NP4112A
R01388	1 Hydroxypyruvate + 1 NADH + 1 H+ => 1 D-Glycerate + 1 NAD+	1 C00168 + 1 C00004 + 1 C00080 => 1 C00258 + 1 C00003	1.1.1.81	NP1162A	NP1162A	D-Glycerate:NADP+ 2-oxidoreductase
R01392	1 Hydroxypyruvate + 1 NADPH + 1 H+ => 1 D-Glycerate + 1 NADP+	1 C00168 + 1 C00005 + 1 C00080 => 1 C00258 + 1 C00006	1.1.1.81	NP1162A	NP1162A	D-Glycerate:NADP+ 2-oxidoreductase
R01395	1 ATP + 1 Carbamate => 1 ADP + 1 Carbamoyl phosphate	1 C00002 + 1 C01563 => 1 C00008 + 1 C00169	2.7.2.2	NP3632A	NP3632A	ATP:carbamate phosphotransferase
R01397	1 Carbamoyl phosphate + 1 L-Aspartate => 1 Orthophosphate + 1 N-Carbamoyl-L-aspartate + 1 H+	1 C00169 + 1 C00049 => 1 C00009 + 1 C00438 + 1 C00080	2.1.3.2	NP3518A NP3520A	NP3518A ^ NP3520A	Carbamoyl-phosphate:L-aspartate carbamoyltransferase
R01398	1 Carbamoyl phosphate + 1 L-Ornithine <=> 1 Orthophosphate + 1 L-Citrulline + 1 H+	1 C00169 + 1 C00077 <=> 1 C00009 + 1 C00327 + 1 C00080	2.1.3.3	NP5268A	NP5268A	Carbamoyl-phosphate:L-ornithine carbamoyltransferase
R01411	1 5-Methylcytosine + 1 H2O <=> 1 Thymine + 1 NH3	1 C02376 + 1 C00001 <=> 1 C00178 + 1 C00014	3.5.4.1	NP0972A NP4788A	NP0972A v NP4788A
R01466	1 O-Phospho-L-homoserine + 1 H2O => 1 L-Threonine + 1 Orthophosphate	1 C01102 + 1 C00001 => 1 C00188 + 1 C00009	4.2.3.1	NP1632A NP4464A NP5280A		O-Phospho-L-homoserine phospho-lyase (adding water)
R01512	1 ATP + 1 3-Phospho-D-glycerate <=> 1 ADP + 1 3-Phospho-D-glyceroyl phosphate	1 C00002 + 1 C00197 <=> 1 C00008 + 1 C00236	2.7.2.3	NP4130A	NP4130A	ATP:3-phospho-D-glycerate 1-phosphotransferase
R01513	1 3-Phospho-D-glycerate + 1 NAD+ <=> 1 3-Phosphonooxypyruvate + 1 NADH + 1 H+	1 C00197 + 1 C00003 <=> 1 C03232 + 1 C00004 + 1 C00080	1.1.1.95	NP0272A NP4720A	NP0272A	3-Phospho-D-glycerate:NAD+ 2-oxidoreductase
R01514	1 ATP + 1 D-Glycerate => 1 ADP + 1 3-Phospho-D-glycerate + 1 H+	1 C00002 + 1 C00258 => 1 C00008 + 1 C00197 + 1 C00080	2.7.1.31			ATP:(R)-glycerate 3-phosphotransferase
R01515	1 3-Phospho-D-glyceroyl phosphate + 1 H2O => 1 3-Phospho-D-glycerate + 1 Orthophosphate + 1 H+	1 C00236 + 1 C00001 => 1 C00197 + 1 C00009 + 1 C00080	3.6.1.7	NP3750A	NP3750A	3-Phospho-D-glyceroyl phosphate phosphohydrolase
R01518	1 2-Phospho-D-glycerate <=> 1 3-Phospho-D-glycerate	1 C00631 <=> 1 C00197	5.4.2.1	NP1964A	NP1964A	2-Phospho-D-glycerate 2,3-phosphomutase
R01519	1 D-Glucono-1,5-lactone + 1 H2O <=> 1 D-Gluconic acid + 1 H+	1 C00198 + 1 C00001 <=> 1 C00257 + 1 C00080	3.1.1.17			D-Glucono-1,5-lactone lactonohydrolase
R01528	1 6-Phospho-D-gluconate + 1 NADP+ => 1 D-Ribulose 5-phosphate + 1 CO2 + 1 NADPH	1 C00345 + 1 C00006 => 1 C00199 + 1 C00011 + 1 C00005	1.1.1.44	NP0286A	NP0286A	6-Phospho-D-gluconate:NADP+ 2-oxidoreductase (decarboxylating)
R01541	1 ATP + 1 2-Dehydro-3-deoxy-D-gluconate <=> 1 ADP + 1 2-Dehydro-3-deoxy-6-phospho-D-gluconate + 1 H+	1 C00002 + 1 C00204 <=> 1 C00008 + 1 C04442 + 1 C00080	2.7.1.45	NP3184A		ATP:2-dehydro-3-deoxy-D-gluconate 6-phosphotransferase
R01547	1 ATP + 1 dAMP <=> 1 ADP + 1 dADP	1 C00002 + 1 C00360 <=> 1 C00008 + 1 C00206	2.7.4.3	NP4910A	NP4910A	ATP:AMP phosphotransferase
R01561	1 Adenosine + 1 Orthophosphate <=> 1 Adenine + 1 D-Ribose 1-phosphate	1 C00212 + 1 C00009 <=> 1 C00147 + 1 C00620	2.4.2.1			Adenosine:orthophosphate ribosyltransferase
R01563	1 N-Carbamoylsarcosine + 1 H2O + 1 H+ => 1 Sarcosine + 1 CO2 + 1 NH3	1 C01043 + 1 C00001 + 1 C00080 => 1 C00213 + 1 C00011 + 1 C00014	3.5.1.59	NP1274A NP1170A		N-Carbamoylsarcosine amidohydrolase
R01569	1 dTMP + 1 H2O => 1 Thymidine + 1 Orthophosphate	1 C00364 + 1 C00001 => 1 C00214 + 1 C00009	3.1.3.5 3.1.3.35	NP1854A NP2590A	NP1854A v NP2590A	Thymidylate 5'-phosphohydrolase
R01570	1 Thymidine + 1 Orthophosphate => 1 Thymine + 1 2-Deoxy-D-ribose 1-phosphate	1 C00214 + 1 C00009 => 1 C00178 + 1 C00672	2.4.2.4	NP3958A	NP3958A	Thymidine:orthophosphate deoxyribosyltransferase
R01648	1 4-Aminobutanoate + 1 2-Oxoglutarate => 1 Succinate semialdehyde + 1 L-Glutamate	1 C00334 + 1 C00026 => 1 C00232 + 1 C00025	2.6.1.19	NP6188A	NP6188A	4-Aminobutanoate:2-oxoglutarate aminotransferase
R01652	1 4-Methyl-2-oxopentanoate + 1 CO2 <=> 1 3-Carboxy-4-methyl-2-oxopentanoate + 1 H+	1 C00233 + 1 C00011 <=> 1 C04236 + 1 C00080	0
R01655	1 5,10-Methenyltetrahydrofolate + 1 H2O <=> 1 10-Formyltetrahydrofolate + 1 H+	1 C00445 + 1 C00001 <=> 1 C00234 + 1 C00080	3.5.4.9	NP2054A	NP2054A
R01658	1 Dimethylallyl diphosphate + 1 Isopentenyl diphosphate => 1 Pyrophosphate + 1 Geranyl diphosphate + 1 H+	1 C00235 + 1 C00129 => 1 C00013 + 1 C00341 + 1 C00080	2.5.1.1 2.5.1.10 2.5.1.29	NP3696A NP4556A NP0604A	NP3696A v NP4556A v NP0604A	Dimethylallyl-diphosphate:isopentenyl-diphosphate dimethylallyltranstransferase
R01664	1 dCMP + 1 H2O => 1 Deoxycytidine + 1 Orthophosphate	1 C00239 + 1 C00001 => 1 C00881 + 1 C00009	3.1.3.5	NP1854A NP2590A	NP1854A v NP2590A	2'-Deoxycytidine 5'-monophosphate phosphohydrolase
R01665	1 ATP + 1 dCMP <=> 1 ADP + 1 dCDP	1 C00002 + 1 C00239 <=> 1 C00008 + 1 C00705	2.7.4.14	NP4914A	NP4914A	ATP:CMP phosphotransferase
R01676	1 Guanine + 1 H2O => 1 Xanthine + 1 NH3 + 1 H+	1 C00242 + 1 C00001 => 1 C00385 + 1 C00014 + 1 C00080	3.5.4.3	NP0972A NP2032A NP4788A	NP0972A v NP2032A v NP4788A	Guanine aminohydrolase
R01698	1 Dihydrolipoamide + 1 NAD+ <=> 1 Lipoamide + 1 NADH + 1 H+	1 C00579 + 1 C00003 <=> 1 C00248 + 1 C00004 + 1 C00080	1.8.1.4	NP0104A	NP0104A
R01701	1 3-Methyl-2-oxobutanoic acid + 1 Lipoamide + 1 H+ => 1 S-(2-Methylpropanoyl)-dihydrolipoamide + 1 CO2	1 C00141 + 1 C00248 + 1 C00080 => 1 C04424 + 1 C00011	1.2.4.4	NP0560A NP0558A	NP0560A ^ NP0558A	3-Methyl-2-oxobutanoate:lipoamide oxidoreductase(decarboxylating and acceptor-2-methylpropanoylating)
R01702	1 4-Methyl-2-oxopentanoate + 1 Lipoamide + 1 H+ => 1 S-(3-Methylbutanoyl)-dihydrolipoamide + 1 CO2	1 C00233 + 1 C00248 + 1 C00080 => 1 C05119 + 1 C00011	1.2.4.4	NP0560A NP0558A	NP0560A ^ NP0558A	4-Methyl-2-oxopentanoate:lipoamide oxidoreductase(decarboxylating and acceptor-2-methylpropanoylating)
R01714	1 5-O-(1-Carboxyvinyl)-3-phosphoshikimate <=> 1 Chorismate + 1 Orthophosphate	1 C01269 <=> 1 C00251 + 1 C00009	4.2.3.5	NP3082A	NP3082A	5-O-(1-Carboxyvinyl)-3-phosphoshikimate phosphate-lyase
R01715	1 Chorismate <=> 1 Prephenate	1 C00251 <=> 1 C00254	5.4.99.5	NP3980A	NP3980A	Chorismate pyruvatemutase
R01716	1 Chorismate + 1 L-Glutamine <=> 1 4-amino-4-deoxychorismate + 1 L-Glutamate	1 C00251 + 1 C00064 <=> 1 C11355 + 1 C00025	2.6.1.85	NP0800A NP0802A	NP0800A ^ NP0802A	Chorismate:L-glutamine amido-ligase
R01717	1 Chorismate <=> 1 Isochorismate	1 C00251 <=> 1 C00885	5.4.4.2	NP2724A	NP2724A	Chorismate hydroxymutase
R01724	1 Nicotinate + 1 5-Phospho-alpha-D-ribose 1-diphosphate => 1 Nicotinate D-ribonucleotide + 1 Pyrophosphate	1 C00253 + 1 C00119 => 1 C01185 + 1 C00013	2.4.2.11	NP1174A	NP1174A	Nicotinate D-ribonucleotide:pyrophosphate phosphoribosyltransferase
R01728	1 Prephenate + 1 NAD+ <=> 1 3-(4-Hydroxyphenyl)pyruvate + 1 CO2 + 1 NADH	1 C00254 + 1 C00003 <=> 1 C01179 + 1 C00011 + 1 C00004	1.3.1.12	NP3358A	NP3358A	Prephenate:NAD+ oxidoreductase(decarboxylating)
R01734	1 Dimethylbenzimidazole <=> 1 Riboflavin	1 C03114 <=> 1 C00255	0			Nicotinate-nucleotide:dimethylbenzimidazole phospho-D-ribosyltransferase
R01736	1 (R)-S-Lactoylglutathione + 1 H2O => 1 Glutathione + 1 (R)-Lactate + 1 H+	1 C03451 + 1 C00001 => 1 C00051 + 1 C00256 + 1 C00080	3.1.2.6	NP0980A NP1136A NP1688A NP1898A NP1974A NP2670A NP2870A NP3944A NP3970A NP4032A NP0092A		S-(2-Hydroxyacyl)glutathione hydrolase
R01737	1 ATP + 1 D-Gluconic acid => 1 ADP + 1 6-Phospho-D-gluconate + 1 H+	1 C00002 + 1 C00257 => 1 C00008 + 1 C00345 + 1 C00080	2.7.1.12			ATP:D-Gluconate 6-phosphotransferase
R01771	1 ATP + 1 L-Homoserine => 1 ADP + 1 O-Phospho-L-homoserine + 1 H+	1 C00002 + 1 C00263 => 1 C00008 + 1 C01102 + 1 C00080	2.7.1.39	NP4524A	NP4524A	ATP:L-homoserine O-phosphotransferase
R01775	1 L-Homoserine + 1 NADP+ <=> 1 L-Aspartate 4-semialdehyde + 1 NADPH + 2 H+	1 C00263 + 1 C00006 <=> 1 C00441 + 1 C00005 + 2 C00080	1.1.1.3	NP0302A	NP0302A	L-Homoserine:NADP+ oxidoreductase
R01776	1 Acetyl-CoA + 1 L-Homoserine => 1 CoA + 1 O-Acetyl-L-homoserine	1 C00024 + 1 C00263 => 1 C00010 + 1 C01077	2.3.1.31	NP0282A	NP0282A	Acetyl-CoA:L-homoserine O-acetyltransferase
R01778	1 (3S)-3-Hydroxyacyl-CoA + 1 NAD+ <=> 1 3-Oxoacyl-CoA + 1 NADH + 1 H+	1 C00640 + 1 C00003 <=> 1 C00264 + 1 C00004 + 1 C00080	1.1.1.35 1.1.1.211	NP1906A NP2754A NP2630A NP4322A		(3S)-3-Hydroxyacyl-CoA:NAD+ oxidoreductase
R01786	1 ATP + 1 alpha-D-Glucose <=> 1 ADP + 1 alpha-D-Glucose 6-phosphate + 1 H+	1 C00002 + 1 C00267 <=> 1 C00008 + 1 C00668 + 1 C00080	2.7.1.1 2.7.1.2	NP3184A		ATP:D-glucose 6-phosphotransferase
R01800	1 CDPdiacylglycerol + 1 L-Serine => 1 CMP + 1 Phosphatidylserine + 1 H+	1 C00269 + 1 C00065 => 1 C00055 + 1 C02737 + 1 C00080	2.7.8.8	NP3230A	NP3230A	CDPdiacylglycerol:L-serine 3-O-phosphatidyltransferase
R01801	1 CDPdiacylglycerol + 1 Glycerol 1-phosphate => 1 CMP + 1 Phosphatidylglycerophosphate	1 C00269 + 1 C00623 => 1 C00055 + 1 C03892	2.7.8.5	NP1334A NP2144A	NP1334A v NP2144A
R01818	1 D-Mannose 6-phosphate <=> 1 D-Mannose 1-phosphate	1 C00275 <=> 1 C00636	5.4.2.8	NP4660A NP4676A NP5158A NP3514A		D-Mannose 6-phosphate 1,6-phosphomutase
R01857	1 ATP + 1 dGDP <=> 1 ADP + 1 dGTP	1 C00002 + 1 C00361 <=> 1 C00008 + 1 C00286	2.7.4.6	NP3666A	NP3666A	ATP:nucleoside-diphosphate phosphatransferase
R01858	1 dGTP + 1 Pyruvate => 1 dGDP + 1 Phosphoenolpyruvate + 1 H+	1 C00286 + 1 C00022 => 1 C00361 + 1 C00074 + 1 C00080	2.7.1.40	NP1746A	NP1746A	dATP:pyruvate O2-phosphotransferase
R01859	1 ATP + 1 Propanoyl-CoA + 1 HCO3- => 1 ADP + 1 Orthophosphate + 1 (S)-2-Methyl-3-oxopropanoyl-CoA + 1 H+	1 C00002 + 1 C00100 + 1 C00288 => 1 C00008 + 1 C00009 + 1 C00683 + 1 C00080	6.4.1.3	NP4250A NP4364A NP3464A	NP4250A ^ NP4364A ^ NP3464A	Propanoyl-CoA:carbon-dioxide ligase (ADP-forming)
R01863	1 Inosine + 1 Orthophosphate <=> 1 Hypoxanthine + 1 D-Ribose 1-phosphate	1 C00294 + 1 C00009 <=> 1 C00262 + 1 C00620	2.4.2.1			Inosine:orthophosphate ribosyltransferase
R01867	1 (S)-Dihydroorotate + 1 Oxygen + 1 H+ <=> 1 Orotate + 1 H2O2	1 C00337 + 1 C00007 + 1 C00080 <=> 1 C00295 + 1 C00027	1.3.3.1	NP0428A	NP0428A	(S)-Dihydroorotate:oxygen oxidoreductase
R01870	1 Orotidine 5'-phosphate + 1 Pyrophosphate + 1 H+ <=> 1 Orotate + 1 5-Phospho-alpha-D-ribose 1-diphosphate	1 C01103 + 1 C00013 + 1 C00080 <=> 1 C00295 + 1 C00119	2.4.2.10	NP1256A	NP1256A	Orotidine-5'-phosphate:pyrophosphate phosphoribosyltransferase
R01876	1 Uridine + 1 Orthophosphate <=> 1 Uracil + 1 D-Ribose 1-phosphate	1 C00299 + 1 C00009 <=> 1 C00106 + 1 C00620	2.4.2.3	NP3180A NP3510A	NP3180A v NP3510A	Uridine:orthophosphate ribosyltransferase
R01878	1 Cytidine + 1 H2O => 1 Uridine + 1 NH3	1 C00475 + 1 C00001 => 1 C00299 + 1 C00014	3.5.4.5	NP3512A	NP3512A	Cytidine aminohydrolase
R01884	1 Creatinine + 1 H2O <=> 1 Creatine	1 C00791 + 1 C00001 <=> 1 C00300	3.5.2.10	NP2120A	NP2120A	Creatinine amidohydrolase
R01899	1 Isocitrate + 1 NADP+ <=> 1 Oxalosuccinate + 1 NADPH + 1 H+	1 C00311 + 1 C00006 <=> 1 C05379 + 1 C00005 + 1 C00080	1.1.1.42	NP2430A	NP2430A	Isocitrate:NADP+ oxidoreductase (decarboxylating)
R01900	1 Isocitrate <=> 1 cis-Aconitate + 1 H2O	1 C00311 <=> 1 C00417 + 1 C00001	4.2.1.3	NP0404A NP1994A	NP0404A v NP1994A	Isocitrate hydro-lyase
R01954	1 ATP + 1 L-Citrulline + 1 L-Aspartate => 1 AMP + 1 Pyrophosphate + 1 N-(L-Arginino)succinate + 2 H+	1 C00002 + 1 C00327 + 1 C00049 => 1 C00020 + 1 C00013 + 1 C03406 + 2 C00080	6.3.4.5	NP5252A	NP5252A	L-Citrulline:L-aspartate ligase (AMP-forming)
R01958	1 Formylkynurenine + 1 H2O <=> 1 Formate + 1 L-Kynurenine + 2 H+	1 C02406 + 1 C00001 <=> 1 C00058 + 1 C00328 + 2 C00080	3.5.1.49 3.5.1.9	NP6204A	NP6204A	N-Formylkynurenine amidohydrolase
R01968	1 dGMP + 1 H2O => 1 Deoxyguanosine + 1 Orthophosphate	1 C00362 + 1 C00001 => 1 C00330 + 1 C00009	3.1.3.5	NP1854A NP2590A	NP1854A v NP2590A	2'-Deoxyguanosine 5'-monophosphate phosphohydrolase
R01969	1 Deoxyguanosine + 1 Orthophosphate <=> 1 Guanine + 1 2-Deoxy-D-ribose 1-phosphate	1 C00330 + 1 C00009 <=> 1 C00242 + 1 C00672	2.4.2.4	NP3958A	NP3958A
R01975	1 (S)-3-Hydroxybutanoyl-CoA + 1 NAD+ <=> 1 Acetoacetyl-CoA + 1 NADH + 1 H+	1 C01144 + 1 C00003 <=> 1 C00332 + 1 C00004 + 1 C00080	1.1.1.35	NP1906A NP2754A NP2630A NP4322A	NP1906A v NP2754A v NP2630A v NP4322A	(S)-3-Hydroxybutanoyl-CoA:NAD+ oxidoreductase
R01978	1 (S)-3-Hydroxy-3-methylglutaryl-CoA + 1 CoA + 1 H+ <=> 1 Acetyl-CoA + 1 H2O + 1 Acetoacetyl-CoA	1 C00356 + 1 C00010 + 1 C00080 <=> 1 C00024 + 1 C00001 + 1 C00332	2.3.3.10	NP2608A NP4836A	NP2608A v NP4836A	(S)-3-Hydroxy-3-methylglutaryl-CoA acetoacetyl-CoA-lyase (CoA-acetylating)
R01993	1 (S)-Dihydroorotate + 1 H2O <=> 1 N-Carbamoyl-L-aspartate	1 C00337 + 1 C00001 <=> 1 C00438	3.5.2.3	NP1706A	NP1706A	(S)-Dihydroorotate amidohydrolase
R02003	1 Geranyl diphosphate + 1 Isopentenyl diphosphate => 1 Pyrophosphate + 1 trans,trans-Farnesyl diphosphate + 1 H+	1 C00341 + 1 C00129 => 1 C00013 + 1 C00448 + 1 C00080	2.5.1.1 2.5.1.10 2.5.1.29	NP3696A NP4556A NP0604A	NP3696A v NP4556A v NP0604A	Geranyl-diphosphate:isopentenyl-diphosphate geranyltrans-transferase
R02016	1 Oxidized thioredoxin + 1 NADPH + 1 H+ => 1 Thioredoxin + 1 NADP+	1 C00343 + 1 C00005 + 1 C00080 => 1 C00342 + 1 C00006	1.8.1.9	NP2680A	NP2680A	NADPH:oxidized-thioredoxin oxidoreductase
R02017	1 Thioredoxin + 1 ADP => 1 dADP + 1 Oxidized thioredoxin + 1 H2O	1 C00342 + 1 C00008 => 1 C00206 + 1 C00343 + 1 C00001	1.17.4.1	NP3346A NP4434A NP5066A NP6166A NP6168A	(NP6166A ^ NP6168A) v (NP3346A ^ NP4434A) v (NP3346A ^ NP5066A)	2'-Deoxyadenosine 5'-diphosphate:oxidized-thioredoxin 2'-oxidoreductase
R02018	1 Thioredoxin + 1 UDP => 1 dUDP + 1 Oxidized thioredoxin + 1 H2O	1 C00342 + 1 C00015 => 1 C01346 + 1 C00343 + 1 C00001	1.17.4.1	NP3346A NP4434A NP5066A NP6166A NP6168A	(NP6166A ^ NP6168A) v (NP3346A ^ NP4434A) v (NP3346A ^ NP5066A)	2'-Deoxyuridine 5'-diphosphate:oxidized-thioredoxin 2'-oxidoreductase
R02019	1 GDP + 1 Thioredoxin => 1 dGDP + 1 Oxidized thioredoxin + 1 H2O	1 C00035 + 1 C00342 => 1 C00361 + 1 C00343 + 1 C00001	1.17.4.1	NP3346A NP4434A NP5066A NP6166A NP6168A	(NP6166A ^ NP6168A) v (NP3346A ^ NP4434A) v (NP3346A ^ NP5066A)	2'-Deoxyguanosine 5'-diphosphate:oxidized-thioredoxin 2'-oxidoreductase
R02021	1 Thioredoxin + 1 3'-Phosphoadenylyl sulfate => 1 Oxidized thioredoxin + 1 Sulfite + 1 Adenosine 3',5'-bisphosphate + 2 H+	1 C00342 + 1 C00053 => 1 C00343 + 1 C00094 + 1 C00054 + 2 C00080	1.8.4.8			Adenosine 3',5'-bisphosphate,sulfite:oxidized-thioredoxin oxidoreductase (3'-phosphoadenosine-5'-phosphosulfate -forming)
R02024	1 Thioredoxin + 1 CDP => 1 dCDP + 1 Oxidized thioredoxin + 1 H2O	1 C00342 + 1 C00112 => 1 C00705 + 1 C00343 + 1 C00001	1.17.4.1	NP3346A NP4434A NP5066A NP6166A NP6168A	(NP6166A ^ NP6168A) v (NP3346A ^ NP4434A) v (NP3346A ^ NP5066A)	2'-Deoxycytidine diphosphate:oxidized-thioredoxin 2'-oxidoreductase
R02026	1 O-Acetyl-L-homoserine + 1 Thiosulfate + 1 Thioredoxin => 1 L-Homocysteine + 1 Sulfite + 1 Oxidized thioredoxin + 1 Acetate + 2 H+	1 C01077 + 1 C00320 + 1 C00342 => 1 C00155 + 1 C00094 + 1 C00343 + 1 C00033 + 2 C00080	2.5.1.49	NP0280A NP0284A	NP0280A v NP0284A
R02055	1 Phosphatidylserine => 1 Phosphatidylethanolamine + 1 CO2	1 C02737 => 1 C00350 + 1 C00011	4.1.1.65	NP4176A	NP4176A	Phsophatidyl-L-serine carboxy-lyase
R02058	1 Acetyl-CoA + 1 D-Glucosamine 6-phosphate => 1 CoA + 1 N-Acetyl-D-glucosamine 6-phosphate	1 C00024 + 1 C00352 => 1 C00010 + 1 C00357	2.3.1.4			Acetyl-CoA:D-glucosamine-6-phosphate N-acetyltransferase
R02061	1 trans,trans-Farnesyl diphosphate + 1 Isopentenyl diphosphate => 1 Pyrophosphate + 1 Geranylgeranyl diphosphate + 1 H+	1 C00448 + 1 C00129 => 1 C00013 + 1 C00353 + 1 C00080	2.5.1.29	NP3696A NP4556A NP0604A	NP3696A v NP4556A v NP0604A	trans,trans-Farnesyl-diphosphate:isopentenyl-diphosphate farnesyltranstransferase
R02063	1 Geranylgeranyl diphosphate + 3 NADPH + 3 H+ <=> 1 Phytyl diphosphate + 3 NADP+	1 C00353 + 3 C00005 + 3 C00080 <=> 1 C05427 + 3 C00006				0
R02065	2 Geranylgeranyl diphosphate => 1 Pyrophosphate + 1 Prephytoene diphosphate + 1 H+	2 C00353 => 1 C00013 + 1 C03427 + 1 C00080	2.5.1.32	NP4770A	NP4770A	Geranylgeranyl-diphosphate:geranylgeranyl-diphosphate geranylgeranyltransferase
R02082	1 (S)-3-Hydroxy-3-methylglutaryl-CoA + 2 NADPH + 2 H+ => 1 (R)-Mevalonate + 1 CoA + 2 NADP+	1 C00356 + 2 C00005 + 2 C00080 => 1 C00418 + 1 C00010 + 2 C00006	1.1.1.34	NP0368A NP2422A	NP0368A v NP2422A	(R)-Mevalonate:NADP+ oxidoreductase (CoA acylating)
R02085	1 (S)-3-Hydroxy-3-methylglutaryl-CoA <=> 1 3-Methylglutaconyl-CoA + 1 H2O	1 C00356 <=> 1 C03231 + 1 C00001	4.2.1.18	NP2754A NP2632A NP1462A NP4322A NP3830A NP0032A NP2936A
R02088	1 dAMP + 1 H2O => 1 Deoxyadenosine + 1 Orthophosphate	1 C00360 + 1 C00001 => 1 C00559 + 1 C00009	3.1.3.5	NP1854A NP2590A	NP1854A v NP2590A	2'-Deoxyadenosine 5'-monophosphate phosphohydrolase
R02090	1 ATP + 1 dGMP <=> 1 ADP + 1 dGDP	1 C00002 + 1 C00362 <=> 1 C00008 + 1 C00361	2.7.4.8			ATP:(d)GMP phosphotransferase
R02093	1 ATP + 1 dTDP <=> 1 ADP + 1 dTTP	1 C00002 + 1 C00363 <=> 1 C00008 + 1 C00459	2.7.4.6	NP3666A	NP3666A	ATP:nucleoside-diphosphate phosphatransferase
R02094	1 ATP + 1 dTMP <=> 1 ADP + 1 dTDP	1 C00002 + 1 C00364 <=> 1 C00008 + 1 C00363	2.7.4.9	NP2478A	NP2478A	ATP:dTMP phosphotransferase
R02098	1 ATP + 1 dUMP <=> 1 ADP + 1 dUDP	1 C00002 + 1 C00365 <=> 1 C00008 + 1 C01346	2.7.4.9	NP2478A	NP2478A	ATP:dTMP phosphotransferase
R02101	1 dUMP + 1 5,10-Methylenetetrahydrofolate => 1 Dihydrofolate + 1 dTMP	1 C00365 + 1 C00143 => 1 C00415 + 1 C00364	2.1.1.45	NP2924A	NP2924A	5,10-Methylenetetrahydrofolate:dUMP C-methyltransferase
R02135	1 Thiamin monophosphate + 1 H2O => 1 Thiamin + 1 Orthophosphate	1 C01081 + 1 C00001 => 1 C00378 + 1 C00009	3.1.3.-	NP2774A
R02142	1 Xanthine + 1 5-Phospho-alpha-D-ribose 1-diphosphate => 1 Xanthosine 5'-phosphate + 1 Pyrophosphate + 1 H+	1 C00385 + 1 C00119 => 1 C00655 + 1 C00013 + 1 C00080	2.4.2.22	NP1426A NP1254A	NP1426A v NP1254A	XMP:pyrophosphate phosphoribosyltransferase
R02147	1 Guanosine + 1 Orthophosphate <=> 1 Guanine + 1 D-Ribose 1-phosphate	1 C00387 + 1 C00009 <=> 1 C00242 + 1 C00620	2.4.2.1			Guanosine:orthophosphate ribosyltransferase
R02198	1 L-Isoleucine + 1 2-Oxoglutarate <=> 1 3-Methyl-2-oxopentanoate + 1 L-Glutamate	1 C00407 + 1 C00026 <=> 1 C03465 + 1 C00025	2.6.1.42	NP5036A	NP5036A
R02199	1 L-Isoleucine + 1 2-Oxoglutarate <=> 1 (3R)-3-Methyl-2-oxopentanoic acid + 1 L-Glutamate	1 C00407 + 1 C00026 <=> 1 C06008 + 1 C00025	2.6.1.42	NP5036A	NP5036A	L-Isoleucine:2-oxoglutarate aminotransferase
R02236	1 Dihydrofolate + 1 NADP+ <=> 1 Folate + 1 NADPH + 1 H+	1 C00415 + 1 C00006 <=> 1 C00504 + 1 C00005 + 1 C00080	1.5.1.3	NP2922A	NP2922A	Dihydrofolate:NADP+ oxidoreductase
R02237	1 ATP + 1 Dihydropteroate + 1 L-Glutamate => 1 ADP + 1 Orthophosphate + 1 Dihydrofolate + 1 H+	1 C00002 + 1 C00921 + 1 C00025 => 1 C00008 + 1 C00009 + 1 C00415 + 1 C00080	6.3.2.17	NP1478A	NP1478A	Tetrahydrofolate:L-glutamate gamma-ligase (ADP-forming)
R02245	1 ATP + 1 (R)-Mevalonate => 1 ADP + 1 (R)-5-Phosphomevalonate + 1 H+	1 C00002 + 1 C00418 => 1 C00008 + 1 C01107 + 1 C00080	2.7.1.36	NP2850A	NP2850A	ATP:(R)-mevalonate 5-phosphotransferase
R02272	1 5-Aminolevulinate <=> 1 (S)-4-Amino-5-oxopentanoate	1 C00430 <=> 1 C03741	5.4.3.8	NP1246A	NP1246A
R02283	1 N-Acetylornithine + 1 2-Oxoglutarate <=> 1 N-Acetyl-L-glutamate 5-semialdehyde + 1 L-Glutamate	1 C00437 + 1 C00026 <=> 1 C01250 + 1 C00025	2.6.1.11	NP5264A	NP5264A	N2-Acetyl-L-ornithine:2-oxoglutarate aminotransferase
R02291	1 L-Aspartate 4-semialdehyde + 1 Orthophosphate + 1 NADP+ <=> 1 4-Phospho-L-aspartate + 1 NADPH + 1 H+	1 C00441 + 1 C00009 + 1 C00006 <=> 1 C03082 + 1 C00005 + 1 C00080	1.2.1.11	NP1988A	NP1988A	L-Aspartate-4-semialdehyde:NADP+ oxidoreductase (phosphorylating)
R02292	1 L-Aspartate 4-semialdehyde + 1 Pyruvate <=> 1 L-2,3-Dihydrodipicolinate + 2 H2O	1 C00441 + 1 C00022 <=> 1 C03340 + 2 C00001	4.2.1.52	NP1490A	NP1490A	L-Aspartate-4-semialdehyde hydro-lyase (adding pyruvate and cyclizing)
R02297	1 Xanthosine + 1 Orthophosphate <=> 1 Xanthine + 1 D-Ribose 1-phosphate	1 C01762 + 1 C00009 <=> 1 C00385 + 1 C00620	2.4.2.1			Xanthosine:orthophosphate ribosyltransferase
R02300	1 5,10-Methenyltetrahydrofolate + 1 H2O => 1 5-Formyltetrahydrofolate + 1 H+	1 C00445 + 1 C00001 => 1 C03479 + 1 C00080	2.1.2.10	NP4774A	NP4774A
R02301	1 ATP + 1 5-Formyltetrahydrofolate => 1 ADP + 1 Orthophosphate + 1 5,10-Methenyltetrahydrofolate	1 C00002 + 1 C03479 => 1 C00008 + 1 C00009 + 1 C00445	6.3.3.2	NP2438A	NP2438A
R02325	1 dCTP + 1 H2O => 1 dUTP + 1 NH3	1 C00458 + 1 C00001 => 1 C00460 + 1 C00014	3.5.4.13	NP5166A NP0954A	NP5166A v NP0954A	dCTP aminohydrolase
R02326	1 ATP + 1 dCDP <=> 1 ADP + 1 dCTP	1 C00002 + 1 C00705 <=> 1 C00008 + 1 C00458	2.7.4.6	NP3666A	NP3666A	ATP:nucleoside-diphosphate phosphatransferase
R02328	1 dTTP + 1 D-Glucose 1-phosphate <=> 1 Pyrophosphate + 1 dTDPglucose	1 C00459 + 1 C00103 <=> 1 C00013 + 1 C00842	2.7.7.24	NP4652A NP4656A NP4674A NP4680A NP2386A NP4276A
R02329	1 dTTP + 1 alpha-D-Galactose 1-phosphate <=> 1 Pyrophosphate + 1 dTDPgalactose	1 C00459 + 1 C00446 <=> 1 C00013 + 1 C02097	2.7.7.32	NP4652A NP4656A NP4674A NP4680A NP2386A NP4276A
R02331	1 ATP + 1 dUDP <=> 1 ADP + 1 dUTP	1 C00002 + 1 C01346 <=> 1 C00008 + 1 C00460	2.7.4.6	NP3666A	NP3666A	ATP:nucleoside-diphosphate phosphatransferase
R02340	1 Indole + 1 D-Glyceraldehyde 3-phosphate <=> 1 Indoleglycerol phosphate	1 C00463 + 1 C00118 <=> 1 C03506	4.2.1.20	NP3162A NP3164A	NP3162A ^ NP3164A	Indole hydro-lyase (adding indoleglycerol-phosphate)
R02408	1 L-Cystine + 1 H2O => 1 Pyruvate + 1 NH3 + 1 Thiocysteine + 1 H+	1 C00491 + 1 C00001 => 1 C00022 + 1 C00014 + 1 C01962 + 1 C00080	4.4.1.1 4.4.1.8	NP4746A	NP4746A
R02412	1 ATP + 1 Shikimate <=> 1 ADP + 1 Shikimate 3-phosphate + 1 H+	1 C00002 + 1 C00493 <=> 1 C00008 + 1 C03175 + 1 C00080	2.7.1.71	NP3982A	NP3982A	ATP:shikimate 3-phosphotransferase
R02413	1 Shikimate + 1 NADP+ <=> 1 3-Dehydroshikimate + 1 NADPH + 1 H+	1 C00493 + 1 C00006 <=> 1 C02637 + 1 C00005 + 1 C00080	1.1.1.25	NP0806A	NP0806A	Shikimate:NADP+ 5-oxidoreductase
R02433	1 L-Cysteate + 1 2-Oxoglutarate + 1 H+ <=> 1 3-Sulfopyruvate + 1 L-Glutamate	1 C00506 + 1 C00026 + 1 C00080 <=> 1 C05528 + 1 C00025	2.6.1.1	NP1666A NP4410A	NP1666A v NP4410A
R02472	1 (R)-Pantoate + 1 NADP+ <=> 1 2-Dehydropantoate + 1 NADPH + 1 H+	1 C00522 + 1 C00006 <=> 1 C00966 + 1 C00005 + 1 C00080	1.1.1.169	NP0942A	NP0942A	(R)-Pantoate:NADP+ 2-oxidoreductase
R02473	1 ATP + 1 (R)-Pantoate + 1 beta-Alanine => 1 AMP + 1 Pyrophosphate + 1 Pantothenate + 2 H+	1 C00002 + 1 C00522 + 1 C00099 => 1 C00020 + 1 C00013 + 1 C00864 + 2 C00080	6.3.2.1			(R)-Pantoate:beta-alanine ligase (AMP-forming)
R02484	1 Deoxyuridine + 1 Orthophosphate + 2 H+ => 1 Uracil + 1 Deoxy-ribose 1-phosphate	1 C00526 + 1 C00009 + 2 C00080 => 1 C00106 + 1 C03496	2.4.2.4	NP3958A	NP3958A
R02485	1 Deoxycytidine + 1 H2O => 1 Deoxyuridine + 1 NH3	1 C00881 + 1 C00001 => 1 C00526 + 1 C00014	3.5.4.5 3.5.4.14	NP3512A	NP3512A
R02508	1 Cystathionine + 1 Succinate + 1 H+ <=> 1 O-Succinyl-L-homoserine + 1 L-Cysteine	1 C00542 + 1 C00042 + 1 C00080 <=> 1 C01118 + 1 C00097	2.5.1.48	NP4746A	NP4746A
R02530	1 Glutathione + 1 Methylglyoxal => 1 (R)-S-Lactoylglutathione	1 C00051 + 1 C00546 => 1 C03451	4.4.1.5	NP1228A NP3948A NP4460A NP2650A		(R)-S-Lactoylglutathione methylglyoxal-lyase (isomerizing)
R02536	1 Phenylacetaldehyde + 1 NAD+ + 1 H2O <=> 1 Phenylacetic acid + 1 NADH + 2 H+	1 C00601 + 1 C00003 + 1 C00001 <=> 1 C07086 + 1 C00004 + 2 C00080	1.2.1.5 1.2.1.39	NP1686A NP3020A		Phenylacetaldehyde:NAD+ oxidoreductase
R02537	1 Phenylacetaldehyde + 1 NADP+ + 1 H2O <=> 1 Phenylacetic acid + 1 NADPH + 2 H+	1 C00601 + 1 C00006 + 1 C00001 <=> 1 C07086 + 1 C00005 + 2 C00080	1.2.1.5	NP1686A		Aldehyde:NADP+ oxidoreductase
R02540	1 2-Phenylacetamide + 1 H2O <=> 1 Phenylacetic acid + 1 NH3 + 1 H+	1 C02505 + 1 C00001 <=> 1 C07086 + 1 C00014 + 1 C00080	3.5.1.4	NP4212A	NP4212A	2-Phenylacetamide amidohydrolase
R02557	1 Deoxyadenosine + 1 Orthophosphate <=> 1 Adenine + 1 2-Deoxy-D-ribose 1-phosphate	1 C00559 + 1 C00009 <=> 1 C00147 + 1 C00672	2.4.2.4	NP3958A	NP3958A
R02568	1 D-Fructose 1-phosphate <=> 1 Glycerone phosphate + 1 D-Glyceraldehyde	1 C01094 <=> 1 C00111 + 1 C00577	4.1.2.13	NP1594A NP3160A	NP1594A ^ NP3160A	D-Fructose 1-phosphate D-glyceraldehyde-3-phosphate-lyase
R02649	1 ATP + 1 N-Acetyl-L-glutamate => 1 ADP + 1 N-Acetyl-L-glutamate 5-phosphate	1 C00002 + 1 C00624 => 1 C00008 + 1 C04133	2.7.2.8	NP5262A	NP5262A	ATP:N-acetyl-L-glutamate 5-phosphotransferase
R02661	1 2-Methylpropanoyl-CoA + 1 FAD => 1 2-Methylprop-2-enoyl-CoA + 1 FADH2	1 C00630 + 1 C00016 => 1 C03460 + 1 C01352	1.3.99.3	NP1596A NP1754A NP1870A NP2620A NP2628A NP2934A NP3004A NP3460A NP4050A NP4214A NP4254A NP6180A		2-Methylpropanoyl-CoA:(acceptor) 2,3-oxidoreductase
R02662	1 S-(2-Methylpropanoyl)-dihydrolipoamide + 1 CoA => 1 2-Methylpropanoyl-CoA + 1 Dihydrolipoamide	1 C04424 + 1 C00010 => 1 C00630 + 1 C00579	2.3.1.-	NP0556A	NP0556A
R02685	1 (3S)-3-Hydroxyacyl-CoA <=> 1 trans-2,3-Dehydroacyl-CoA + 1 H2O	1 C00640 <=> 1 C00658 + 1 C00001	4.2.1.17	NP0032A NP0488A NP0916A NP1462A NP2256A NP2632A NP2754A NP2758A NP2936A NP3434A NP3830A NP4248A NP4322A		(3S)-3-Hydroxyacyl-CoA hydro-lyase
R02719	1 Xanthosine 5'-phosphate + 1 H2O => 1 Xanthosine + 1 Orthophosphate	1 C00655 + 1 C00001 => 1 C01762 + 1 C00009	3.1.3.5	NP1854A NP2590A	NP1854A v NP2590A	Xanthosine 5'-phosphate phosphohydrolase
R02731	1 D-Fructose 2,6-bisphosphate + 1 H2O => 1 Orthophosphate + 1 D-Fructose 6-phosphate	1 C00665 + 1 C00001 => 1 C00009 + 1 C00085	3.1.3.46	NP1332A		D-Fructose-2,6-bisphosphate 2-phosphohydrolase
R02734	1 N-Succinyl-LL-2,6-diaminoheptanedioate + 1 H2O <=> 1 Succinate + 1 LL-2,6-Diaminoheptanedioate	1 C04421 + 1 C00001 <=> 1 C00042 + 1 C00666	3.5.1.18			N-Succinyl-LL-2,6-diaminoheptanedioate amidohydrolase
R02735	1 LL-2,6-Diaminoheptanedioate <=> 1 meso-2,6-Diaminoheptanedioate	1 C00666 <=> 1 C00680	5.1.1.7			LL-2,6-Diaminoheptanedioate 2-epimerase
R02737	1 UDPglucose + 1 alpha-D-Glucose 6-phosphate => 1 UDP + 1 alpha,alpha'-Trehalose 6-phosphate + 1 H+	1 C00029 + 1 C00668 => 1 C00015 + 1 C00689 + 1 C00080	2.4.1.15
R02739	1 alpha-D-Glucose 6-phosphate <=> 1 beta-D-Glucose 6-phosphate	1 C00668 <=> 1 C01172	5.3.1.9	NP4992A	NP4992A	alpha-D-Glucose 6-phosphate ketol-isomerase
R02740	1 alpha-D-Glucose 6-phosphate <=> 1 D-Fructose 6-phosphate	1 C00668 <=> 1 C00085	5.3.1.9	NP4992A	NP4992A	alpha-D-Glucose 6-phosphate ketol-isomerase
R02748	1 Deoxyinosine + 1 Orthophosphate => 1 Hypoxanthine + 1 2-Deoxy-D-ribose 1-phosphate	1 C05512 + 1 C00009 => 1 C00262 + 1 C00672	2.4.2.4	NP3958A	NP3958A
R02749	1 2-Deoxy-D-ribose 1-phosphate <=> 1 2-Deoxy-D-ribose 5-phosphate	1 C00672 <=> 1 C00673	5.4.2.7	NP3514A	NP3514A
R02750	1 Deoxyribose + 1 ATP => 1 2-Deoxy-D-ribose 5-phosphate + 1 ADP + 1 H+	1 C01801 + 1 C00002 => 1 C00673 + 1 C00008 + 1 C00080	2.7.1.15	NP3184A
R02765	1 (S)-2-Methyl-3-oxopropanoyl-CoA <=> 1 (R)-2-Methyl-3-oxopropanoyl-CoA	1 C00683 <=> 1 C01213	5.1.99.1	NP1228A	NP1228A	(R)-2-Methyl-3-oxopropanoyl-CoA 2-epimerase
R02778	1 alpha,alpha'-Trehalose 6-phosphate + 1 H2O => 1 alpha,alpha-Trehalose + 1 Orthophosphate	1 C00689 + 1 C00001 => 1 C01083 + 1 C00009	3.1.3.12
R02864	1 Siroheme + 2 H+ <=> 1 Iron + 1 Sirohydrochlorin	1 C00748 + 2 C00080 <=> 1 C00023 + 1 C05778	4.99.1.4	NP4500A	NP4500A
R02872	1 Presqualene diphosphate + 1 NADPH + 1 H+ => 1 Pyrophosphate + 1 Squalene + 1 NADP+ + 1 H+	1 C03428 + 1 C00005 + 1 C00080 => 1 C00013 + 1 C00751 + 1 C00006 + 1 C00080	2.5.1.21			Presqualene diphosphate:farnesyl-diphosphate farnesyltransferase
R02918	1 ATP + 1 L-Tyrosine + 1 tRNA(Tyr) => 1 AMP + 1 Pyrophosphate + 1 L-Tyrosyl-tRNA(Tyr) + 1 H+	1 C00002 + 1 C00082 + 1 C00787 => 1 C00020 + 1 C00013 + 1 C02839 + 1 C00080	6.1.1.1	NP2810A	NP2810A
R02984	1 dTDPglucose <=> 1 dTDPgalactose	1 C00842 <=> 1 C02097	5.1.3.2	NP4662A NP3504A NP4112A	NP4662A v NP3504A v NP4112A
R03005	1 ATP + 1 Nicotinate D-ribonucleotide => 1 Pyrophosphate + 1 Deamino-NAD+	1 C00002 + 1 C01185 => 1 C00013 + 1 C00857	2.7.7.1	NP0310A NP0908A	NP0310A v NP0908A	ATP:nicotinamide-nucleotide adenylyltransferase
R03012	1 L-Histidinol + 1 NAD+ <=> 1 L-Histidinal + 1 NADH + 2 H+	1 C00860 + 1 C00003 <=> 1 C01929 + 1 C00004 + 2 C00080	1.1.1.23	NP2876A	NP2876A	L-Histidinol:NAD+ oxidoreductase
R03013	1 L-Histidinol phosphate + 1 H2O + 1 H+ <=> 1 L-Histidinol + 1 Orthophosphate	1 C01100 + 1 C00001 + 1 C00080 <=> 1 C00860 + 1 C00009	3.1.3.15			L-Histidinol-phosphate phosphohydrolase
R03018	1 ATP + 1 Pantothenate => 1 ADP + 1 D-4'-Phosphopantothenate + 1 H+	1 C00002 + 1 C00864 => 1 C00008 + 1 C03492 + 1 C00080	2.7.1.33			ATP:pantothenate 4'-phosphotransferase
R03026	1 (S)-3-Hydroxybutanoyl-CoA <=> 1 Crotonoyl-CoA + 1 H2O	1 C01144 <=> 1 C00877 + 1 C00001	4.2.1.17	NP0032A NP1462A NP2632A NP2754A NP2758A NP2936A NP3434A NP3830A NP4248A NP4322A	NP0032A v NP1462A v NP2632A v NP2754A v NP2758A v NP2936A v NP3434A v NP3830A v NP4248A v NP4322A	(S)-3-Hydroxybutanoyl-CoA hydro-lyase
R03035	1 ATP + 1 Pantetheine 4'-phosphate => 1 Pyrophosphate + 1 Dephospho-CoA	1 C00002 + 1 C01134 => 1 C00013 + 1 C00882	2.7.7.3	NP3368A	NP3368A	ATP:pantetheine-4'-phosphate adenylyltransferase
R03038	1 ATP + 1 L-Alanine + 1 tRNA(Ala) => 1 AMP + 1 Pyrophosphate + 1 L-Alanyl-tRNA + 1 H+	1 C00002 + 1 C00041 + 1 C01635 => 1 C00020 + 1 C00013 + 1 C00886 + 1 C00080	6.1.1.7	NP0710A	NP0710A	L-Alanine:tRNA(Ala) ligase (AMP-forming)
R03045	1 3-Hydroxypropionyl-CoA <=> 1 Propenoyl-CoA + 1 H2O	1 C05668 <=> 1 C00894 + 1 C00001	4.2.1.17	NP0032A NP0488A NP0916A NP1462A NP2256A NP2632A NP2754A NP2758A NP2936A NP3434A NP3830A NP4248A NP4322A	NP0032A v NP0488A v NP0916A v NP1462A v NP2256A v NP2632A v NP2754A v NP2758A v NP2936A v NP3434A v NP3830A v NP4248A v NP4322A	3-Hydroxypropionyl-CoA hydro-lyase
R03067	1 2-Amino-7,8-dihydro-4-hydroxy-6-(diphosphooxymethyl)pteridine + 1 4-Aminobenzoate => 1 Pyrophosphate + 1 Dihydropteroate + 1 H+	1 C04807 + 1 C00568 => 1 C00013 + 1 C00921 + 1 C00080	2.5.1.15	NP1478A NP3770A	NP1478A v NP3770A	2-Amino-4-hydroxy-6-hydroxymethyl-7,8-dihydropteridine- diphosphate:4-aminobenzoate 2-amino-4-hydroxydihydropteridine-6-methenyltransferase
R03082	1 (R)-Lactaldehyde + 1 Glutathione + 1 NAD+ <=> 1 (R)-S-Lactoylglutathione + 1 NADH + 1 H+	1 C00937 + 1 C00051 + 1 C00003 <=> 1 C03451 + 1 C00004 + 1 C00080	1.2.1.1	NP3020A NP1686A		(R)-Lactaldehyde:NAD+ oxidoreductase (glutathione-formylating)
R03083	1 2-Dehydro-3-deoxy-D-arabino-heptonate 7-phosphate <=> 1 3-Dehydroquinate + 1 Orthophosphate	1 C04691 <=> 1 C00944 + 1 C00009	4.2.3.4	NP2238A	NP2238A	2-Dehydro-3-deoxy-D-arabino-heptonate 7-phosphate phosphate-lyase (cyclyzing)
R03084	1 3-Dehydroquinate <=> 1 3-Dehydroshikimate + 1 H2O	1 C00944 <=> 1 C02637 + 1 C00001	4.2.1.10	NP2240A	NP2240A	3-Dehydroquinate hydro-lyase
R03096	1 Indole-3-acetamide + 1 H2O <=> 1 Indole-3-acetate + 1 NH3 + 1 H+	1 C02693 + 1 C00001 <=> 1 C00954 + 1 C00014 + 1 C00080	3.5.1.4	NP4212A	NP4212A	Indole-3-acetamide amidohydrolase
R03132	1 O-Acetyl-L-serine + 1 Thiosulfate => 1 S-Sulfo-L-cysteine + 1 Acetate + 1 H+	1 C00979 + 1 C00320 => 1 C05824 + 1 C00033 + 1 C00080	2.5.1.47 2.5.1.48	NP4746A	NP4746A
R03140	1 D-Ribulose 1,5-bisphosphate + 1 Oxygen => 1 3-Phospho-D-glycerate + 1 2-Phosphoglycolate + 2 H+	1 C01182 + 1 C00007 => 1 C00197 + 1 C00988 + 2 C00080	4.1.1.39	NP2770A	NP2770A
R03165	1 Hydroxymethylbilane <=> 1 Uroporphyrinogen III + 1 H2O	1 C01024 <=> 1 C01051 + 1 C00001	4.2.1.75	NP1330A	NP1330A
R03172	1 2-Methylbutanoyl-CoA + 1 FAD => 1 2-Methylbut-2-enoyl-CoA + 1 FADH2	1 C01033 + 1 C00016 => 1 C03345 + 1 C01352	1.3.99.3	NP1596A NP1754A NP1870A NP2620A NP2628A NP2934A NP3004A NP3460A NP4050A NP4214A NP4254A NP6180A		2-Methylbutanoyl-CoA:(acceptor) 2,3-oxidoreductase
R03174	1 S-(2-Methylbutanoyl)-dihydrolipoamide + 1 CoA => 1 2-Methylbutanoyl-CoA + 1 Dihydrolipoamide	1 C05118 + 1 C00010 => 1 C01033 + 1 C00579	2.3.1.-	NP0556A	NP0556A
R03180	1 4-Guanidinobutanamide + 1 H2O <=> 1 4-Guanidinobutanoate + 1 NH3 + 1 H+	1 C03078 + 1 C00001 <=> 1 C01035 + 1 C00014 + 1 C00080	3.5.1.4	NP0178A NP0374A NP4212A	NP4212A	4-Guanidinobutanamide amidohydrolase
R03187	1 ATP + 1 N-Methylhydantoin + 2 H2O => 1 ADP + 1 Orthophosphate + 1 N-Carbamoylsarcosine + 2 H+	1 C00002 + 1 C02565 + 2 C00001 => 1 C00008 + 1 C00009 + 1 C01043 + 2 C00080	3.5.2.14	NP2954A NP6216A NP6218A	NP6216A ^ NP6218A	N-Methylimidazolidine-2,4-dione amidohydrolase (ATP-hydrolysing)
R03194	2 S-Adenosyl-L-methionine + 1 Uroporphyrinogen III <=> 2 S-Adenosyl-L-homocysteine + 1 Precorrin 2 + 2 H+	2 C00019 + 1 C01051 <=> 2 C00021 + 1 C02463 + 2 C00080	2.1.1.107	NP1328A	NP1328A
R03197	1 Uroporphyrinogen III + 4 H+ <=> 1 Coproporphyrinogen III + 4 CO2	1 C01051 + 4 C00080 <=> 1 C03263 + 4 C00011	4.1.1.37
R03217	1 O-Acetyl-L-homoserine + 1 L-Cysteine => 1 L-Cystathionine + 1 Acetate + 1 H+	1 C01077 + 1 C00097 => 1 C02291 + 1 C00033 + 1 C00080	2.5.1.49	NP0280A NP0284A	NP0280A v NP0284A	O-Acetyl-L-homoserine succinate-lyase (adding cysteine)
R03220	1 Coproporphyrinogen III + 1 Oxygen + 2 H+ <=> 1 Protoporphyrinogen IX + 2 CO2 + 2 H2O	1 C03263 + 1 C00007 + 2 C00080 <=> 1 C01079 + 2 C00011 + 2 C00001	1.3.3.3
R03222	2 Protoporphyrinogen IX + 3 Oxygen <=> 2 Protoporphyrin + 6 H2O	2 C01079 + 3 C00007 <=> 2 C02191 + 6 C00001	1.3.3.4	NP4520A	NP4520A
R03223	1 2-Methyl-4-amino-5-hydroxymethylpyrimidine diphosphate + 1 4-Methyl-5-(2-phosphoethyl)-thiazole => 1 Pyrophosphate + 1 Thiamin monophosphate	1 C04752 + 1 C04327 => 1 C00013 + 1 C01081	2.5.1.3	NP4054A	NP4054A
R03224	1 (3R)-3-Hydroxyacyl-CoA <=> 1 cis-2,3-Dehydroacyl-CoA + 1 H2O	1 C01086 <=> 1 C01122 + 1 C00001	4.2.1.17	NP0032A NP0488A NP0916A NP1462A NP2256A NP2632A NP2754A NP2758A NP2936A NP3434A NP3830A NP4248A NP4322A		(3R)-3-Hydroxyacyl-CoA hydro-lyase
R03243	1 L-Histidinol phosphate + 1 2-Oxoglutarate + 1 H+ <=> 1 3-(Imidazol-4-yl)-2-oxopropyl phosphate + 1 L-Glutamate	1 C01100 + 1 C00026 + 1 C00080 <=> 1 C01267 + 1 C00025	2.6.1.9	NP2140A	NP2140A	5-Amino-2-oxopentanoate:2-oxoglutarate aminotransferase
R03260	1 O-Succinyl-L-homoserine + 1 L-Cysteine => 1 L-Cystathionine + 1 Succinate + 1 H+	1 C01118 + 1 C00097 => 1 C02291 + 1 C00042 + 1 C00080	2.5.1.48	NP4746A	NP4746A	O-Succinyl-L-homoserine succinate-lyase (adding cysteine)
R03269	1 (R)-4'-Phosphopantothenoyl-L-cysteine + 1 H+ => 1 Pantetheine 4'-phosphate + 1 CO2	1 C04352 + 1 C00080 => 1 C01134 + 1 C00011	4.1.1.36	NP1374A	NP1374A	N-[(R)-4'-Phosphopantothenoyl]-L-cysteine carboxy-lyase
R03313	1 L-Glutamyl 5-phosphate + 1 NADPH + 1 H+ <=> 1 L-Glutamate 5-semialdehyde + 1 Orthophosphate + 1 NADP+	1 C03287 + 1 C00005 + 1 C00080 <=> 1 C01165 + 1 C00009 + 1 C00006	1.2.1.41	NP3978A	NP3978A	L-Glutamate-5-semialdehyde:NADP+ 5-oxidoreductase (phosphorylationg)
R03314	1 L-Glutamate 5-semialdehyde <=> 1 (S)-1-Pyrroline-5-carboxylate + 1 H2O + 1 H+	1 C01165 <=> 1 C03912 + 1 C00001 + 1 C00080	0
R03321	1 beta-D-Glucose 6-phosphate <=> 1 D-Fructose 6-phosphate	1 C01172 <=> 1 C00085	5.3.1.9	NP4992A	NP4992A	beta-D-Glucose 6-phosphate ketol-isomerase
R03346	1 Nicotinate D-ribonucleotide + 1 H2O => 1 Nicotinate D-ribonucleoside + 1 Orthophosphate	1 C01185 + 1 C00001 => 1 C05841 + 1 C00009	3.1.3.5	NP1854A NP2590A NP4208A	NP1854A v NP2590A v NP4208A	Nicotinate D-ribonucleotide phosphohydrolase
R03348	1 Pyridine-2,3-dicarboxylate + 1 5-Phospho-alpha-D-ribose 1-diphosphate + 1 H+ => 1 Nicotinate D-ribonucleotide + 1 Pyrophosphate + 1 CO2	1 C03722 + 1 C00119 + 1 C00080 => 1 C01185 + 1 C00013 + 1 C00011	2.4.2.19	NP2414A	NP2414A	Nicotinate-nucleotide:pyrophosphate phosphoribosyltransferase (carboxylating)
R03425	1 Glycine + 1 Lipoylprotein => 1 S-Aminomethyldihydrolipoylprotein + 1 CO2	1 C00037 + 1 C02051 => 1 C01242 + 1 C00011	1.4.4.2	NP4594A NP4596A		Glycine:lipoylprotein oxidoreductase (decarboxylating and acceptor-aminomethylating)
R03443	1 N-Acetyl-L-glutamate 5-semialdehyde + 1 Orthophosphate + 1 NADP+ <=> 1 N-Acetyl-L-glutamate 5-phosphate + 1 NADPH + 1 H+	1 C01250 + 1 C00009 + 1 C00006 <=> 1 C04133 + 1 C00005 + 1 C00080	1.2.1.38	NP5260A	NP5260A	N-Acetyl-L-glutamate-5-semialdehyde:NADP+ 5-oxidoreductase (phosphrylating)
R03457	1 D-erythro-1-(Imidazol-4-yl)glycerol 3-phosphate <=> 1 3-(Imidazol-4-yl)-2-oxopropyl phosphate + 1 H2O	1 C04666 <=> 1 C01267 + 1 C00001	4.2.1.19	NP2258A	NP2258A	D-erythro-1-(Imidazol-4-yl)glycerol 3-phosphate hydro-lyase
R03458	1 5-Amino-6-(5'-phosphoribosylamino)uracil + 1 NADPH + 1 H+ => 1 5-Amino-6-(5'-phosphoribitylamino)uracil + 1 NADP+	1 C01268 + 1 C00005 + 1 C00080 => 1 C04454 + 1 C00006	1.1.1.193	NP2672A	NP2672A	5-Amino-6-(5-phosphoribitylamino)uracil:NADP+ 1'-oxidoreductase
R03459	1 2,5-Diamino-6-hydroxy-4-(5'-phosphoribosylamino)-pyrimidine + 1 H2O => 1 5-Amino-6-(5'-phosphoribosylamino)uracil + 1 NH3	1 C01304 + 1 C00001 => 1 C01268 + 1 C00014	3.5.4.26			2,5-Diamino-6-hydroxy-4-(5-phosphoribosylamino)-pyrimidine 2-aminohydrolase
R03460	1 Phosphoenolpyruvate + 1 Shikimate 3-phosphate <=> 1 Orthophosphate + 1 5-O-(1-Carboxyvinyl)-3-phosphoshikimate	1 C00074 + 1 C03175 <=> 1 C00009 + 1 C01269	2.5.1.19	NP3078A	NP3078A	Phosphoenolpyruvate:3-phosphoshikimate 5-O-(1-carboxyvinyl)-transferase
R03471	1 ATP + 1 4-Amino-5-hydroxymethyl-2-methylpyrimidine => 1 ADP + 1 4-Amino-2-methyl-5-phosphomethylpyrimidine + 1 H+	1 C00002 + 1 C01279 => 1 C00008 + 1 C04556 + 1 C00080	2.7.1.49	NP0564A
R03472	1 Aminoimidazole ribotide => 1 4-Amino-5-hydroxymethyl-2-methylpyrimidine	1 C03373 => 1 C01279		NP2210A	NP2210A	ThiC
R03503	1 ATP + 1 2-Amino-4-hydroxy-6-hydroxymethyl-7,8-dihydropteridine => 1 AMP + 1 2-Amino-7,8-dihydro-4-hydroxy-6-(diphosphooxymethyl)pteridine + 1 H+	1 C00002 + 1 C01300 => 1 C00020 + 1 C04807 + 1 C00080	2.7.6.3			ATP:2-amino-4-hydroxy-6-hydroxymethyl-7,8-dihydropteridine 6'-pyrophosphotransferase
R03504	1 2-Amino-4-hydroxy-6-(D-erythro-1,2,3-trihydroxypropyl)-7,8- <=> 1 Glycolaldehyde + 1 2-Amino-4-hydroxy-6-hydroxymethyl-7,8-dihydropteridine	1 C04874 <=> 1 C00266 + 1 C01300	4.1.2.25			2-Amino-4-hydroxy-6-(D-erythro-1,2,3-trihydroxypropyl)-7,8- dihydropteridine glycolaldehyde-lyase
R03508	1 1-(2-Carboxyphenylamino)-1'-deoxy-D-ribulose 5'-phosphate + 1 H+ <=> 1 Indoleglycerol phosphate + 1 CO2 + 1 H2O	1 C01302 + 1 C00080 <=> 1 C03506 + 1 C00011 + 1 C00001	4.1.1.48	NP3166A	NP3166A	1-(2-Carboxyphenylamino)-1-deoxy-D-ribulose-5-phosphate carboxy-lyase(cyclizing)
R03509	1 N-(5-Phospho-D-ribosyl)anthranilate <=> 1 1-(2-Carboxyphenylamino)-1'-deoxy-D-ribulose 5'-phosphate	1 C04302 <=> 1 C01302	5.3.1.24	NP3340A	NP3340A	N-(5-Phospho-beta-D-ribosyl)anthranilate ketol-isomerase
R03530	1 ATP + 1 dIDP <=> 1 ADP + 1 dITP	1 C00002 + 1 C01344 <=> 1 C00008 + 1 C01345	2.7.4.6	NP3666A	NP3666A	ATP:nucleoside-diphosphate phosphatransferase
R03537	1 2',3'-Cyclic AMP + 1 H2O => 1 3'-AMP + 1 H+	1 C02353 + 1 C00001 => 1 C01367 + 1 C00080	3.1.4.16	NP1854A NP2590A	NP1854A v NP2590A	2',3'-Cyclic AMP 3'-nucleotidohydrolase
R03629	1 Melatonin + 1 Reduced flavoprotein + 1 Oxygen + 1 H+ <=> 1 6-Hydroxymelatonin + 1 Oxidized flavoprotein + 1 H2O	1 C01598 + 1 C03024 + 1 C00007 + 1 C00080 <=> 1 C05643 + 1 C03161 + 1 C00001	1.14.14.1	NP2540A	NP2540A	Substrate,reduced-flaboprotein:oxygen oxidoreductase (RH-hydroxylating or -epoxidizing)
R03646	1 ATP + 1 L-Arginine + 1 tRNA(Arg) => 1 AMP + 1 Pyrophosphate + 1 L-Arginyl-tRNA(Arg) + 1 H+	1 C00002 + 1 C00062 + 1 C01636 => 1 C00020 + 1 C00013 + 1 C02163 + 1 C00080	6.1.1.19	NP0066A	NP0066A
R03647	1 ATP + 1 L-Aspartate + 1 tRNA(Asn) => 1 AMP + 1 Pyrophosphate + 1 L-Aspartyl-tRNA(Asn) + 1 H+	1 C00002 + 1 C00049 + 1 C01637 => 1 C00020 + 1 C00013 + 1 C06113 + 1 C00080	6.1.1.12	NP1168A	NP1168A	L-Aspartate:tRNAAsp ligase (AMP-forming)
R03650	1 ATP + 1 L-Cysteine + 1 tRNA(Cys) => 1 AMP + 1 Pyrophosphate + 1 L-Cysteinyl-tRNA(Cys) + 1 H+	1 C00002 + 1 C00097 + 1 C01639 => 1 C00020 + 1 C00013 + 1 C03125 + 1 C00080	6.1.1.16	NP4440A	NP4440A	L-Cysteine:tRNA(Cys) ligase (AMP-forming)
R03651	1 ATP + 1 L-Glutamate + 1 tRNA(Gln) => 1 AMP + 1 Pyrophosphate + 1 L-Glutamyl-tRNA(Gln) + 1 H+	1 C00002 + 1 C00025 + 1 C01640 => 1 C00020 + 1 C00013 + 1 C06112 + 1 C00080	6.1.1.17	NP3694A	NP3694A	L-Glutamate:tRNA(Gln) ligase (AMP-forming)
R03654	1 ATP + 1 Glycine + 1 tRNA(Gly) => 1 AMP + 1 Pyrophosphate + 1 Glycyl-tRNA(Gly) + 1 H+	1 C00002 + 1 C00037 + 1 C01642 => 1 C00020 + 1 C00013 + 1 C02412 + 1 C00080	6.1.1.14	NP0328A	NP0328A	Glycine:tRNA(Gly) ligase (AMP-forming)
R03655	1 ATP + 1 L-Histidine + 1 tRNA(His) => 1 AMP + 1 Pyrophosphate + 1 L-Histidyl-tRNA(His) + 1 H+	1 C00002 + 1 C00135 + 1 C01643 => 1 C00020 + 1 C00013 + 1 C02988 + 1 C00080	6.1.1.21	NP5044A	NP5044A
R03656	1 ATP + 1 L-Isoleucine + 1 tRNA(Ile) => 1 AMP + 1 Pyrophosphate + 1 L-Isoleucyl-tRNA(Ile) + 1 H+	1 C00002 + 1 C00407 + 1 C01644 => 1 C00020 + 1 C00013 + 1 C03127 + 1 C00080	6.1.1.5	NP0610A	NP0610A
R03657	1 ATP + 1 L-Leucine + 1 tRNA(Leu) => 1 AMP + 1 Pyrophosphate + 1 L-Leucyl-tRNA + 1 H+	1 C00002 + 1 C00123 + 1 C01645 => 1 C00020 + 1 C00013 + 1 C02047 + 1 C00080	6.1.1.4	NP0452A	NP0452A
R03658	1 ATP + 1 L-Lysine + 1 tRNA(Lys) => 1 AMP + 1 Pyrophosphate + 1 L-Lysyl-tRNA + 1 H+	1 C00002 + 1 C00047 + 1 C01646 => 1 C00020 + 1 C00013 + 1 C01931 + 1 C00080	6.1.1.6	NP2270A	NP2270A
R03659	1 ATP + 1 L-Methionine + 1 tRNA(Met) => 1 AMP + 1 Pyrophosphate + 1 L-Methionyl-tRNA + 1 H+	1 C00002 + 1 C00073 + 1 C01647 => 1 C00020 + 1 C00013 + 1 C02430 + 1 C00080	6.1.1.10	NP1192A	NP1192A	L-Methionine:tRNAMet ligase (AMP-forming)
R03660	1 ATP + 1 L-Phenylalanine + 1 tRNA(Phe) => 1 AMP + 1 Pyrophosphate + 1 L-Phenylalanyl-tRNA(Phe) + 1 H+	1 C00002 + 1 C00079 + 1 C01648 => 1 C00020 + 1 C00013 + 1 C03511 + 1 C00080	6.1.1.20	NP0694A NP0696A	NP0694A ^ NP0696A
R03661	1 ATP + 1 L-Proline + 1 tRNA(Pro) => 1 AMP + 1 Pyrophosphate + 1 L-Prolyl-tRNA(Pro) + 1 H+	1 C00002 + 1 C00148 + 1 C01649 => 1 C00020 + 1 C00013 + 1 C02702 + 1 C00080	6.1.1.15	NP1796A	NP1796A
R03662	1 ATP + 1 L-Serine + 1 tRNA(Ser) => 1 AMP + 1 Pyrophosphate + 1 L-Seryl-tRNA(Ser) + 1 H+	1 C00002 + 1 C00065 + 1 C01650 => 1 C00020 + 1 C00013 + 1 C02553 + 1 C00080	6.1.1.11	NP1692A	NP1692A	L-Serine:tRNA(Ser) ligase (AMP-forming)
R03663	1 ATP + 1 L-Threonine + 1 tRNA(Thr) => 1 AMP + 1 Pyrophosphate + 1 L-Threonyl-tRNA(Thr) + 1 H+	1 C00002 + 1 C00188 + 1 C01651 => 1 C00020 + 1 C00013 + 1 C02992 + 1 C00080	6.1.1.3	NP2410A	NP2410A	L-Threonine:tRNA(Thr) ligase (AMP-forming)
R03664	1 ATP + 1 L-Tryptophan + 1 tRNA(Trp) => 1 AMP + 1 Pyrophosphate + 1 L-Tryptophanyl-tRNA(Trp) + 1 H+	1 C00002 + 1 C00078 + 1 C01652 => 1 C00020 + 1 C00013 + 1 C03512 + 1 C00080	6.1.1.2	NP0442A	NP0442A
R03665	1 ATP + 1 L-Valine + 1 tRNA(Val) => 1 AMP + 1 Pyrophosphate + 1 L-Valyl-tRNA(Val) + 1 H+	1 C00002 + 1 C00183 + 1 C01653 => 1 C00020 + 1 C00013 + 1 C02554 + 1 C00080	6.1.1.9	NP0288A	NP0288A
R03777	1 Octanoyl-CoA + 1 FAD => 1 trans-Oct-2-enoyl-CoA + 1 FADH2	1 C01944 + 1 C00016 => 1 C05276 + 1 C01352	1.3.99.3	NP1596A NP1754A NP1870A NP2620A NP2628A NP2934A NP3004A NP3460A NP4050A NP4214A NP4254A NP6180A	NP1596A v NP1754A v NP1870A v NP2620A v NP2628A v NP2934A v NP3004A v NP3460A v NP4050A v NP4214A v NP4254A v NP6180A	Octanoyl-CoA:oxygen 2-oxidoreductase
R03778	1 Octanoyl-CoA + 1 Acetyl-CoA <=> 1 CoA + 1 3-Oxodecanoyl-CoA	1 C01944 + 1 C00024 <=> 1 C00010 + 1 C05265	2.3.1.16	NP2214A NP2260A NP2606A NP2612A NP3420A NP3438A NP3650A NP4580A	NP2214A v NP2260A v NP2606A v NP2612A v NP3420A v NP3438A v NP3650A v NP4580A	Octanoyl-CoA:acetyl-CoA C-acyltransferase
R03815	1 Dihydrolipoylprotein + 1 NAD+ => 1 Lipoylprotein + 1 NADH + 1 H+	1 C02972 + 1 C00003 => 1 C02051 + 1 C00004 + 1 C00080	1.8.1.4	NP0104A	NP0104A
R03824	1 gamma-Carotene + 1 NADPH => 1 beta-Carotene + 1 NADP+ + 1 H+	1 C05435 + 1 C00005 => 1 C02094 + 1 C00006 + 1 C00080		NP0652A	NP0652A	Lycopene cyclase
R03857	1 Lauroyl-CoA + 1 FAD => 1 2-trans-Dodecenoyl-CoA + 1 FADH2	1 C01832 + 1 C00016 => 1 C03221 + 1 C01352	1.3.99.3	NP1596A NP1754A NP1870A NP2620A NP2628A NP2934A NP3004A NP3460A NP4050A NP4214A NP4254A NP6180A	NP1596A v NP1754A v NP1870A v NP2620A v NP2628A v NP2934A v NP3004A v NP3460A v NP4050A v NP4214A v NP4254A v NP6180A	Lauroyl-CoA:(acceptor) 2,3-oxidoreductase
R03858	1 Lauroyl-CoA + 1 Acetyl-CoA <=> 1 CoA + 1 3-Oxotetradecanoyl-CoA	1 C01832 + 1 C00024 <=> 1 C00010 + 1 C05261	2.3.1.16	NP2214A NP2260A NP2606A NP2612A NP3420A NP3438A NP3650A NP4580A	NP2214A v NP2260A v NP2606A v NP2612A v NP3420A v NP3438A v NP3650A v NP4580A	Lauroyl-CoA:acetyl-CoA C-acyltransferase
R03877	1 ATP + 1 Protoporphyrin + 1 Magnesium + 1 H2O <=> 1 ADP + 1 Orthophosphate + 1 Magnesium protoporphyrin + 3 H+	1 C00002 + 1 C02191 + 1 C00305 + 1 C00001 <=> 1 C00008 + 1 C00009 + 1 C03516 + 3 C00080	6.6.1.1	NP1094A	NP1094A
R03896	1 (R)-2-Methylmalate => 1 2-Methylmaleate + 1 H2O	1 C02612 => 1 C02226 + 1 C00001	4.2.1.35	NP2192A NP2194A	NP2192A ^ NP2194A	LeuC/D
R03898	1 2-Methylmaleate + 1 H2O => 1 D-erythro-3-Methylmalate	1 C02226 + 1 C00001 => 1 C06032		NP2192A NP2194A	NP2192A ^ NP2194A	LeuC/D
R03947	1 Precorrin 2 + 1 NAD+ <=> 1 Sirohydrochlorin + 1 NADH + 1 H+	1 C02463 + 1 C00003 <=> 1 C05778 + 1 C00004 + 1 C00080	1.3.1.76	NP4500A	NP4500A
R03968	1 2-Isopropylmalate <=> 1 2-Isopropylmaleate + 1 H2O	1 C02504 <=> 1 C02631 + 1 C00001	4.2.1.33	NP2192A NP2194A	NP2192A ^ NP2194A	2-Isopropylmalate hydro-lyase
R03990	1 Tetradecanoyl-CoA + 1 FAD => 1 trans-Tetradec-2-enoyl-CoA + 1 FADH2	1 C02593 + 1 C00016 => 1 C05273 + 1 C01352	1.3.99.3	NP1596A NP1754A NP1870A NP2620A NP2628A NP2934A NP3004A NP3460A NP4050A NP4214A NP4254A NP6180A	NP1596A v NP1754A v NP1870A v NP2620A v NP2628A v NP2934A v NP3004A v NP3460A v NP4050A v NP4214A v NP4254A v NP6180A	Tetradecanoyl-CoA:(acceptor) 2,3-oxidoreductase
R03991	1 Tetradecanoyl-CoA + 1 Acetyl-CoA <=> 1 CoA + 1 3-Oxopalmitoyl-CoA	1 C02593 + 1 C00024 <=> 1 C00010 + 1 C05259	2.3.1.16	NP2214A NP2260A NP2606A NP2612A NP3420A NP3438A NP3650A NP4580A	NP2214A v NP2260A v NP2606A v NP2612A v NP3420A v NP3438A v NP3650A v NP4580A	Myristoyl-CoA:acetylCoA C-myristoyltransferase
R04001	1 3-Isopropylmalate <=> 1 2-Isopropylmaleate + 1 H2O	1 C04411 <=> 1 C02631 + 1 C00001	4.2.1.33	NP2192A NP2194A	NP2192A ^ NP2194A	3-Isopropylmalate hydro-lyase
R04030	1 ATP + 1 2-Succinylbenzoate + 1 CoA => 1 AMP + 1 Pyrophosphate + 1 2-Succinylbenzoyl-CoA + 1 H+	1 C00002 + 1 C02730 + 1 C00010 => 1 C00020 + 1 C00013 + 1 C03160 + 1 C00080	6.2.1.26	NP2738A	NP2738A	O-Succinylbenzoate:CoA ligase (AMP-forming)
R04031	1 2-Succinyl-6-hydroxy-2,4-cyclohexadiene-1-carboxylate => 1 2-Succinylbenzoate + 1 H2O	1 C05817 => 1 C02730 + 1 C00001	4.2.1.-	NP2736A	NP2736A
R04035	1 Phosphoribosyl-ATP + 1 H2O <=> 1 Phosphoribosyl-AMP + 1 Pyrophosphate + 2 H+	1 C02739 + 1 C00001 <=> 1 C02741 + 1 C00013 + 2 C00080	3.6.1.31	NP0470A	NP0470A	Phosphoribosyl-ATP pyrophosphohydrolase
R04037	1 Phosphoribosyl-AMP + 1 H2O <=> 1 5-(5-Phospho-D-ribosylaminoformimino)-1-(5-phosphoribosyl)-	1 C02741 + 1 C00001 <=> 1 C04896	3.5.4.19	NP5154A	NP5154A	Phosphoribosyl-AMP 1,6-hydrolase
R04095	1 3-Methylbutanoyl-CoA + 1 FAD => 1 3-Methylcrotonyl-CoA + 1 FADH2	1 C02939 + 1 C00016 => 1 C03069 + 1 C01352	1.3.99.3	NP1596A NP1754A NP1870A NP2620A NP2628A NP2934A NP3004A NP3460A NP4050A NP4214A NP4254A NP6180A		3-Methylbutanoyl-CoA:(acceptor) 2,3-oxidoreductase
R04097	1 S-(3-Methylbutanoyl)-dihydrolipoamide + 1 CoA => 1 3-Methylbutanoyl-CoA + 1 Dihydrolipoamide	1 C05119 + 1 C00010 => 1 C02939 + 1 C00579	2.3.1.-	NP0556A	NP0556A
R04109	1 L-Glutamyl-tRNA(Glu) + 1 NADPH <=> 1 (S)-4-Amino-5-oxopentanoate + 1 tRNA(Glu) + 1 NADP+	1 C02987 + 1 C00005 <=> 1 C03741 + 1 C01641 + 1 C00006	1.2.1.70	NP4502A	NP4502A
R04125	1 Tetrahydrofolate + 1 S-Aminomethyldihydrolipoylprotein => 1 5,10-Methylenetetrahydrofolate + 1 NH3 + 1 Dihydrolipoylprotein	1 C00101 + 1 C01242 => 1 C00143 + 1 C00014 + 1 C02972	2.1.2.10	NP4774A	NP4774A	S-Aminomethyldihydrolipoylprotein:(6S)-tetrahydrofolate aminomethyltransfe rase (ammonia-forming)
R04137	1 3-Hydroxyisovaleryl-CoA <=> 1 3-Methylcrotonyl-CoA + 1 H2O	1 C05998 <=> 1 C03069 + 1 C00001	4.2.1.17	NP0032A NP0488A NP0916A NP1462A NP2256A NP2632A NP2754A NP2758A NP2936A NP3434A NP3830A NP4248A NP4322A	NP0032A v NP0488A v NP0916A v NP1462A v NP2256A v NP2632A v NP2754A v NP2758A v NP2936A v NP3434A v NP3830A v NP4248A v NP4322A	3-Hydroxyisopentyl-CoA hydro-lyase
R04138	1 ATP + 1 3-Methylcrotonyl-CoA + 1 HCO3- => 1 ADP + 1 Orthophosphate + 1 3-Methylglutaconyl-CoA + 1 H+	1 C00002 + 1 C03069 + 1 C00288 => 1 C00008 + 1 C00009 + 1 C03231 + 1 C00080	6.4.1.4	NP4250A NP3464A NP4364A
R04144	1 ATP + 1 5-Phosphoribosylamine + 1 Glycine <=> 1 ADP + 1 Orthophosphate + 1 5'-Phosphoribosylglycinamide + 1 H+	1 C00002 + 1 C03090 + 1 C00037 <=> 1 C00008 + 1 C00009 + 1 C03838 + 1 C00080	6.3.4.13	NP3972A	NP3972A	5-Phospho-D-ribosylamine:glycine ligase (ADP-forming)
R04148	1 Nicotinate D-ribonucleotide + 1 Dimethylbenzimidazole => 1 Nicotinate + 1 N1-(5-Phospho-alpha-D-ribosyl)-5,6-dimethylbenzimidazole + 1 H+	1 C01185 + 1 C03114 => 1 C00253 + 1 C04778 + 1 C00080	2.4.2.21	NP0736A	NP0736A	Nicotinate-nucleotide:dimethylbenzimidazole phospho-D-ribosyltransferase
R04150	1 2-Succinylbenzoyl-CoA <=> 1 1,4-Dihydroxy-2-naphthoate + 1 CoA	1 C03160 <=> 1 C03657 + 1 C00010	4.1.3.36	NP2730A	NP2730A	O-Succinylbenzoyl-CoA 1,4-dihydroxy-2-naphthoate-lyase
R04158	1 Geranylgeranyl diphosphate + 1 Glycerol 1-phosphate => 1 Pyrophosphate + 1 sn-3-O-(Geranylgeranyl)glycerol 1-phosphate + 1 H+	1 C00353 + 1 C00623 => 1 C00013 + 1 C04590 + 1 C00080	2.5.1.41			Geranylgeranyl diphosphate:sn-glyceryl phosphate geranylgeranyltransferase
R04170	1 (S)-3-Hydroxydodecanoyl-CoA <=> 1 2-trans-Dodecenoyl-CoA + 1 H2O	1 C05262 <=> 1 C03221 + 1 C00001	4.2.1.17	NP0032A NP1462A NP2632A NP2754A NP2758A NP2936A NP3434A NP3830A NP4248A NP4322A	NP0032A v NP1462A v NP2632A v NP2754A v NP2758A v NP2936A v NP3434A v NP3830A v NP4248A v NP4322A	(S)-3-Hydroxydodecanoyl-CoA hydro-lyase
R04173	1 3-Phosphonooxypyruvate + 1 L-Glutamate <=> 1 O-Phospho-L-serine + 1 2-Oxoglutarate + 1 H+	1 C03232 + 1 C00025 <=> 1 C01005 + 1 C00026 + 1 C00080	2.6.1.52	NP2578A NP0884A		3-Phosphoserine:2-oxoglutarate aminotransferase
R04198	1 2,3,4,5-Tetrahydrodipicolinate + 1 NAD+ <=> 1 L-2,3-Dihydrodipicolinate + 1 NADH + 1 H+	1 C03972 + 1 C00003 <=> 1 C03340 + 1 C00004 + 1 C00080	1.3.1.26	NP1492A	NP1492A	2,3,4,5-Tetrahydrodipicolinate:NAD+ oxidoreductase
R04199	1 2,3,4,5-Tetrahydrodipicolinate + 1 NADP+ <=> 1 L-2,3-Dihydrodipicolinate + 1 NADPH + 1 H+	1 C03972 + 1 C00006 <=> 1 C03340 + 1 C00005 + 1 C00080	1.3.1.26	NP1492A	NP1492A	2,3,4,5-Tetrahydrodipicolinate:NADP+ oxidoreductase
R04203	1 (2S,3S)-3-Hydroxy-2-methylbutanoyl-CoA + 1 NAD+ <=> 1 2-Methylacetoacetyl-CoA + 1 NADH + 1 H+	1 C04405 + 1 C00003 <=> 1 C03344 + 1 C00004 + 1 C00080	1.1.1.35	NP1906A NP2754A NP2630A NP4322A		(2S,3S)-3-Hydroxy-2-methylbutanoyl-CoA:NAD+ oxidoreductase
R04204	1 2-Methylbut-2-enoyl-CoA + 1 H2O => 1 (2S,3S)-3-Hydroxy-2-methylbutanoyl-CoA	1 C03345 + 1 C00001 => 1 C04405	4.2.1.17	NP0032A NP0488A NP0916A NP1462A NP2256A NP2632A NP2754A NP2758A NP2936A NP3434A NP3830A NP4248A NP4322A		(2S,3S)-3-Hydroxy-2-methylbutanoyl-CoA hydro-liase
R04208	1 ATP + 1 2-(Formamido)-N1-(5'-phosphoribosyl)acetamidine => 1 ADP + 1 Orthophosphate + 1 Aminoimidazole ribotide + 1 H+	1 C00002 + 1 C04640 => 1 C00008 + 1 C00009 + 1 C03373 + 1 C00080	6.3.3.1	NP3940A	NP3940A	2-(Formamido)-N1-(5-phosphoribosyl)acetamidine cyclo-ligase (ADP-forming)
R04209	1 1-(5-Phospho-D-ribosyl)-5-amino-4-imidazolecarboxylate + 1 H+ <=> 1 Aminoimidazole ribotide + 1 CO2	1 C04751 + 1 C00080 <=> 1 C03373 + 1 C00011	4.1.1.21	NP2286A NP2290A	NP2286A ^ NP2290A	1-(5-Phospho-D-ribosyl)-5-amino-4-imidazolecarboxylate carboxy-lyase
R04218	1 Prephytoene diphosphate + 1 NADPH => 1 Pyrophosphate + 1 NADP+ + 1 Phytoene + 2 H+	1 C03427 + 1 C00005 => 1 C00013 + 1 C00006 + 1 C05413 + 2 C00080	2.5.1.32	NP4770A	NP4770A	Prephytoene diphosphate:geranylgeranyl-diphosphate geranylgeranyltransferase
R04224	1 2-Methylprop-2-enoyl-CoA + 1 H2O => 1 (S)-3-Hydroxyisobutyryl-CoA	1 C03460 + 1 C00001 => 1 C06000	4.2.1.17	NP0032A NP0488A NP0916A NP1462A NP2256A NP2632A NP2754A NP2758A NP2936A NP3434A NP3830A NP4248A NP4322A		(S)-3-Hydroxyisobutyryl-CoA hydro-lyase
R04225	1 3-Methyl-2-oxopentanoate + 1 Lipoamide + 1 H+ => 1 S-(2-Methylbutanoyl)-dihydrolipoamide + 1 CO2	1 C03465 + 1 C00248 + 1 C00080 => 1 C05118 + 1 C00011	1.2.4.4	NP0560A NP0558A	NP0560A ^ NP0558A	3-Methyl-2-oxopentanoate:lipoamide oxidoreductase(decarboxylating and acceptor-2-methylpropanoylating)
R04230	1 ATP + 1 D-4'-Phosphopantothenate + 1 L-Cysteine => 1 ADP + 1 Orthophosphate + 1 (R)-4'-Phosphopantothenoyl-L-cysteine + 1 H+	1 C00002 + 1 C03492 + 1 C00097 => 1 C00008 + 1 C00009 + 1 C04352 + 1 C00080	6.3.2.5	NP1374A	NP1374A	(R)-4'-Phosphopantothenate:L-cysteine ligase
R04233	1 CTP + 1 D-4'-Phosphopantothenate + 1 L-Cysteine => 1 CDP + 1 Orthophosphate + 1 (R)-4'-Phosphopantothenoyl-L-cysteine + 1 H+	1 C00063 + 1 C03492 + 1 C00097 => 1 C00112 + 1 C00009 + 1 C04352 + 1 C00080	6.3.2.5	NP1374A	NP1374A	(R)-4'-Phosphopantothenate:L-cysteine ligase
R04286	1 2-Amino-4-hydroxy-6-(erythro-1,2,3-trihydroxypropyl) => 1 6-Pyruvoyltetrahydropterin + 1 Triphosphate + 1 H+	1 C04895 => 1 C03684 + 1 C00536 + 1 C00080	4.2.3.12	NP1342A	NP1342A
R04292	1 Iminoaspartate + 1 Glycerone phosphate => 1 Pyridine-2,3-dicarboxylate + 2 H2O + 1 Orthophosphate	1 C05840 + 1 C00111 => 1 C03722 + 2 C00001 + 1 C00009	4.1.99.-	NP2418A	NP2418A
R04325	1 10-Formyltetrahydrofolate + 1 5'-Phosphoribosylglycinamide <=> 1 Tetrahydrofolate + 1 5'-Phosphoribosyl-N-formylglycinamide	1 C00234 + 1 C03838 <=> 1 C00101 + 1 C04376	2.1.2.2	NP1662A	NP1662A	10-Formyltetrahydrofolate:5'-phosphoribosylglycinamide formyltransferase
R04336	1 L-2-Amino-6-oxoheptanedioate <=> 1 2,3,4,5-Tetrahydrodipicolinate + 1 H2O + 1 H+	1 C03871 <=> 1 C03972 + 1 C00001 + 1 C00080	0
R04365	1 Succinyl-CoA + 1 2,3,4,5-Tetrahydrodipicolinate + 1 H2O <=> 1 CoA + 1 N-Succinyl-2-L-amino-6-oxoheptanedioate	1 C00091 + 1 C03972 + 1 C00001 <=> 1 C00010 + 1 C04462	2.3.1.117	NP1494A	NP1494A	Succinyl-CoA:2,3,4,5-tetrahydropyridine-2,6-dicarboxylate N-succinyltransferase
R04378	1 1-(5'-Phosphoribosyl)-5-amino-4-imidazolecarboxamide + 1 Pyrophosphate + 1 H+ <=> 1 5-Amino-4-imidazolecarboxyamide + 1 5-Phospho-alpha-D-ribose 1-diphosphate	1 C04677 + 1 C00013 + 1 C00080 <=> 1 C04051 + 1 C00119	2.4.2.7	NP1426A NP1254A	NP1426A v NP1254A	1-(5'-Phosphoribosyl)-5-amino-4-imidazolecarboxamide:pyrophosphate phosphoribosyltransferase
R04405	1 5-Methyltetrahydropteroyltri-L-glutamate + 1 L-Homocysteine => 1 Tetrahydropteroyltri-L-glutamate + 1 L-Methionine	1 C04489 + 1 C00155 => 1 C04144 + 1 C00073	2.1.1.14	NP3670A NP3672A	NP3670A v NP3672A	5-Methyltetrahydropteroyltri-L-glutamate:L-homocysteine S-methyltransferase
R04426	1 3-Isopropylmalate + 1 NAD+ <=> 1 3-Carboxy-4-methyl-2-oxopentanoate + 1 NADH + 1 H+	1 C04411 + 1 C00003 <=> 1 C04236 + 1 C00004 + 1 C00080	1.1.1.85	NP2190A	NP2190A	3-Isopropylmalate:NAD+ oxidoreductase
R04439	1 (R)-2,3-Dihydroxy-3-methylbutanoate + 1 NADP+ <=> 1 (S)-2-Acetolactate + 1 NADPH + 1 H+	1 C04272 + 1 C00006 <=> 1 C06010 + 1 C00005 + 1 C00080	1.1.1.86	NP2198A	NP2198A
R04440	1 (R)-2,3-Dihydroxy-3-methylbutanoate + 1 NADP+ <=> 1 NADPH + 1 3-Hydroxy-3-methyl-2-oxobutanoic acid + 1 H+	1 C04272 + 1 C00006 <=> 1 C00005 + 1 C04181 + 1 C00080	1.1.1.86	NP2198A	NP2198A	(R)-2,3-Dihydroxy-3-methylbutanoate:NADP+ oxidoreductase (isomerizing)
R04441	1 (R)-2,3-Dihydroxy-3-methylbutanoate => 1 3-Methyl-2-oxobutanoic acid + 1 H2O	1 C04272 => 1 C00141 + 1 C00001	4.2.1.9	NP4926A	NP4926A	(R)-2,3-Dihydroxy-3-methylbutanoate hydro-lyase
R04448	1 ATP + 1 5-(2-Hydroxyethyl)-4-methylthiazole => 1 ADP + 1 4-Methyl-5-(2-phosphoethyl)-thiazole + 1 H+	1 C00002 + 1 C04294 => 1 C00008 + 1 C04327 + 1 C00080	2.7.1.50	NP4052A	NP4052A
R04457	1 4-(1-D-Ribitylamino)-5-amino-2,6-dihydroxypyrimidine + 1 3, 4-Dihydroxy-2-butanone 4-phosphate => 1 6,7-Dimethyl-8-(1-D-ribityl)lumazine + 1 Orthophosphate + 2 H2O + 1 H+	1 C04732 + 1 C15556 => 1 C04332 + 1 C00009 + 2 C00001 + 1 C00080	2.5.1.9	NP4412A	NP4412A	6,7-Dimethyl-8-(1-D-ribityl)lumazine:6,7-dimethyl-8-(1-D-ribityl) lumazine 2,3-butanediyltransferase
R04463	1 ATP + 1 5'-Phosphoribosyl-N-formylglycinamide + 1 L-Glutamine + 1 H2O => 1 ADP + 1 Orthophosphate + 1 2-(Formamido)-N1-(5'-phosphoribosyl)acetamidine + 1 L-Glutamate + 2 H+	1 C00002 + 1 C04376 + 1 C00064 + 1 C00001 => 1 C00008 + 1 C00009 + 1 C04640 + 1 C00025 + 2 C00080	6.3.5.3	NP2982A NP5008A NP5010A	NP2982A ^ NP5008A ^ NP5010A	5'-Phosphoribosylformylglycinamide:L-glutamine amido-ligase (ADP-forming)
R04475	1 N-Succinyl-LL-2,6-diaminoheptanedioate + 1 2-Oxoglutarate <=> 1 N-Succinyl-2-L-amino-6-oxoheptanedioate + 1 L-Glutamate	1 C04421 + 1 C00026 <=> 1 C04462 + 1 C00025	2.6.1.17	NP5264A	NP5264A	N-Succinyl-L-2,6-diaminoheptanedioate:2-ocoglytarate amino-transferase
R04509	1 ATP + 1 4-Amino-2-methyl-5-phosphomethylpyrimidine => 1 ADP + 1 2-Methyl-4-amino-5-hydroxymethylpyrimidine diphosphate	1 C00002 + 1 C04556 => 1 C00008 + 1 C04752	2.7.4.7	NP0546A	NP0546A
R04520	1 Geranylgeranyl diphosphate + 1 sn-3-O-(Geranylgeranyl)glycerol 1-phosphate <=> 1 Pyrophosphate + 1 2,3-Bis-O-(geranylgeranyl)glycerol 1-phosphate + 1 H+	1 C00353 + 1 C04590 <=> 1 C00013 + 1 C04638 + 1 C00080	2.5.1.42			Geranylgeranyl diphosphate:sn-3-O-(geranylgeranyl)glycerol 1-phosphate geranylgeranyltransferase
R04558	1 1-(5'-Phosphoribosyl)-5-amino-4-imidazolecarboxamide + 1 L-Glutamate + 1 D-erythro-1-(Imidazol-4-yl)glycerol 3-phosphate + 1 H+ <=> 1 N-(5'-Phospho-D-1'-ribulosylformimino)-5-amino-1-(5''-phospho-D- + 1 L-Glutamine	1 C04677 + 1 C00025 + 1 C04666 + 1 C00080 <=> 1 C04916 + 1 C00064	2.4.2.-	NP0082A NP4158A	NP0082A ^ NP4158A
R04559	1 1-(5'-Phosphoribosyl)-5-amino-4-(N-succinocarboxamide)-imidazole <=> 1 Fumarate + 1 1-(5'-Phosphoribosyl)-5-amino-4-imidazolecarboxamide	1 C04823 <=> 1 C00122 + 1 C04677	4.3.2.2	NP1658A	NP1658A	1-(5'-Phosphoribosyl)-5-amino-4-(N-succinocarboxamide)-imidazole AMP-lyase
R04560	1 10-Formyltetrahydrofolate + 1 1-(5'-Phosphoribosyl)-5-amino-4-imidazolecarboxamide <=> 1 Tetrahydrofolate + 1 1-(5'-Phosphoribosyl)-5-formamido-4-imidazolecarboxamide	1 C00234 + 1 C04677 <=> 1 C00101 + 1 C04734	2.1.2.3	NP1662A	NP1662A	10-Formyltetrahydrofolate:5'-phosphoribosyl-5-amino-4- imidazolecarboxamide formyltransferase
R04591	1 ATP + 1 1-(5-Phospho-D-ribosyl)-5-amino-4-imidazolecarboxylate + 1 L-Aspartate <=> 1 ADP + 1 Orthophosphate + 1 1-(5'-Phosphoribosyl)-5-amino-4-(N-succinocarboxamide)-imidazole + 1 H+	1 C00002 + 1 C04751 + 1 C00049 <=> 1 C00008 + 1 C00009 + 1 C04823 + 1 C00080	6.3.2.6	NP4996A	NP4996A	1-(5-Phosphoribosyl)-5-amino-4-carboxyimidazole:L-aspartate ligase (ADP-forming)
R04594	1 N1-(5-Phospho-alpha-D-ribosyl)-5,6-dimethylbenzimidazole + 1 H2O => 1 alpha-Ribazole + 1 Orthophosphate	1 C04778 + 1 C00001 => 1 C05775 + 1 C00009	3.1.3.73	NP1332A	NP1332A
R04620	1 2-Amino-4-hydroxy-6-(erythro-1,2,3-trihydroxypropyl) + 3 H2O => 1 2-Amino-4-hydroxy-6-(D-erythro-1,2,3-trihydroxypropyl)-7,8- + 3 Orthophosphate + 2 H+	1 C04895 + 3 C00001 => 1 C04874 + 3 C00009 + 2 C00080	3.1.3.1			2-Amino-4-hydroxy-6-(erythro-1,2,3-trihydroxypropyl) dihydropteridine triphosphate phosphohydrolase (alkaline optimum)
R04621	1 Dihydroneopterin phosphate + 1 H2O => 1 2-Amino-4-hydroxy-6-(D-erythro-1,2,3-trihydroxypropyl)-7,8- + 1 Orthophosphate	1 C05925 + 1 C00001 => 1 C04874 + 1 C00009	3.6.1.-
R04638	1 2-Amino-4-hydroxy-6-(erythro-1,2,3-trihydroxypropyl) + 1 H2O => 1 Dihydroneopterin phosphate + 1 Pyrophosphate + 2 H+	1 C04895 + 1 C00001 => 1 C05925 + 1 C00013 + 2 C00080	3.6.1.-
R04639	1 2,5-Diamino-6-(5'-triphosphoryl-3',4'-trihydroxy-2'-oxopentyl)- <=> 1 2-Amino-4-hydroxy-6-(erythro-1,2,3-trihydroxypropyl) + 1 H2O	1 C06148 <=> 1 C04895 + 1 C00001	3.5.4.16			2-Amino-4-hydroxy-6-(erythro-1,2,3-trihydroxypropyl) dihydropteridine triphosphate 7,8-8,9-dihydrolase
R04640	1 5-(5-Phospho-D-ribosylaminoformimino)-1-(5-phosphoribosyl)- <=> 1 N-(5'-Phospho-D-1'-ribulosylformimino)-5-amino-1-(5''-phospho-D-	1 C04896 <=> 1 C04916	5.3.1.16	NP1268A	NP1268A	N-(5'-Phospho-D-ribosylformimino)-5-amino-1- (5''-phospho-D-ribosyl)-4-imidazolecarboxamide ketol-isomerase
R04672	1 2-(alpha-Hydroxyethyl)thiamine diphosphate + 1 Pyruvate => 1 (S)-2-Acetolactate + 1 Thiamin diphosphate	1 C05125 + 1 C00022 => 1 C06010 + 1 C00068	2.2.1.6	NP2200A NP2202A	NP2200A ^ NP2202A	(S)-2-Acetolactate pyruvate-lyase (carboxylating)
R04673	1 2-Oxobutanoate + 1 2-(alpha-Hydroxyethyl)thiamine diphosphate => 1 (S)-2-Aceto-2-hydroxybutanoate + 1 Thiamin diphosphate	1 C00109 + 1 C05125 => 1 C06006 + 1 C00068	2.2.1.6	NP2200A NP2202A	NP2200A ^ NP2202A	(S)-2-Aceto-2-hydroxybutanoate pyruvate-lyase (carboxylating)
R04737	1 (S)-3-Hydroxyhexadecanoyl-CoA + 1 NAD+ <=> 1 3-Oxopalmitoyl-CoA + 1 NADH + 1 H+	1 C05258 + 1 C00003 <=> 1 C05259 + 1 C00004 + 1 C00080	1.1.1.35	NP1906A NP2754A NP2630A NP4322A	NP1906A v NP2754A v NP2630A v NP4322A	(S)-3-Hydroxyhexadecanoyl-CoA:NAD+ oxidoreductase
R04738	1 (S)-3-Hydroxyhexadecanoyl-CoA <=> 1 trans-Hexadec-2-enoyl-CoA + 1 H2O	1 C05258 <=> 1 C05272 + 1 C00001	4.2.1.17	NP0032A NP1462A NP2632A NP2754A NP2758A NP2936A NP3434A NP3830A NP4248A NP4322A	NP0032A v NP1462A v NP2632A v NP2754A v NP2758A v NP2936A v NP3434A v NP3830A v NP4248A v NP4322A	(S)-3-Hydroxyhexadecanoyl-CoA hydro-lyase
R04739	1 (S)-3-Hydroxytetradecanoyl-CoA + 1 NAD+ <=> 1 3-Oxotetradecanoyl-CoA + 1 NADH + 1 H+	1 C05260 + 1 C00003 <=> 1 C05261 + 1 C00004 + 1 C00080	1.1.1.35	NP1906A NP2754A NP2630A NP4322A	NP1906A v NP2754A v NP2630A v NP4322A	(S)-3-Hydroxytetradecanoyl-CoA:NAD+ oxidoreductase
R04740	1 (S)-3-Hydroxytetradecanoyl-CoA <=> 1 trans-Tetradec-2-enoyl-CoA + 1 H2O	1 C05260 <=> 1 C05273 + 1 C00001	4.2.1.17	NP0032A NP1462A NP2632A NP2754A NP2758A NP2936A NP3434A NP3830A NP4248A NP4322A	NP0032A v NP1462A v NP2632A v NP2754A v NP2758A v NP2936A v NP3434A v NP3830A v NP4248A v NP4322A	(S)-3-Hydroxytetradecanoyl-CoA hydro-lyase
R04741	1 (S)-3-Hydroxydodecanoyl-CoA + 1 NAD+ <=> 1 3-Oxododecanoyl-CoA + 1 NADH + 1 H+	1 C05262 + 1 C00003 <=> 1 C05263 + 1 C00004 + 1 C00080	1.1.1.35	NP1906A NP2754A NP2630A NP4322A	NP1906A v NP2754A v NP2630A v NP4322A	(S)-3-Hydroxydodecanoyl-CoA:NAD+ oxidoreductase
R04742	1 Decanoyl-CoA + 1 Acetyl-CoA <=> 1 CoA + 1 3-Oxododecanoyl-CoA	1 C05274 + 1 C00024 <=> 1 C00010 + 1 C05263	2.3.1.16	NP2214A NP2260A NP2606A NP2612A NP3420A NP3438A NP3650A NP4580A	NP2214A v NP2260A v NP2606A v NP2612A v NP3420A v NP3438A v NP3650A v NP4580A	Decanoyl-CoA:acetyl-CoA C-acyltransferase
R04743	1 (S)-Hydroxydecanoyl-CoA + 1 NAD+ <=> 1 3-Oxodecanoyl-CoA + 1 NADH + 1 H+	1 C05264 + 1 C00003 <=> 1 C05265 + 1 C00004 + 1 C00080	1.1.1.35	NP1906A NP2754A NP2630A NP4322A	NP1906A v NP2754A v NP2630A v NP4322A	(S)-Hydroxydecanoyl-CoA:NAD+ oxidoreductase
R04744	1 (S)-Hydroxydecanoyl-CoA <=> 1 trans-Dec-2-enoyl-CoA + 1 H2O	1 C05264 <=> 1 C05275 + 1 C00001	4.2.1.17	NP0032A NP1462A NP2632A NP2754A NP2758A NP2936A NP3434A NP3830A NP4248A NP4322A	NP0032A v NP1462A v NP2632A v NP2754A v NP2758A v NP2936A v NP3434A v NP3830A v NP4248A v NP4322A	(S)-Hydroxydecanoyl-CoA hydro-lyase
R04745	1 (S)-Hydroxyoctanoyl-CoA + 1 NAD+ <=> 1 3-Oxooctanoyl-CoA + 1 NADH + 1 H+	1 C05266 + 1 C00003 <=> 1 C05267 + 1 C00004 + 1 C00080	1.1.1.35	NP1906A NP2754A NP2630A NP4322A	NP1906A v NP2754A v NP2630A v NP4322A	(S)-Hydroxyoctanoyl-CoA:NAD+ oxidoreductase
R04746	1 (S)-Hydroxyoctanoyl-CoA <=> 1 trans-Oct-2-enoyl-CoA + 1 H2O	1 C05266 <=> 1 C05276 + 1 C00001	4.2.1.17	NP0032A NP1462A NP2632A NP2754A NP2758A NP2936A NP3434A NP3830A NP4248A NP4322A	NP0032A v NP1462A v NP2632A v NP2754A v NP2758A v NP2936A v NP3434A v NP3830A v NP4248A v NP4322A	(S)-Hydroxyoctanoyl-CoA hydro-lyase
R04747	1 Hexanoyl-CoA + 1 Acetyl-CoA <=> 1 CoA + 1 3-Oxooctanoyl-CoA	1 C05270 + 1 C00024 <=> 1 C00010 + 1 C05267	2.3.1.16	NP2214A NP2260A NP2606A NP2612A NP3420A NP3438A NP3650A NP4580A	NP2214A v NP2260A v NP2606A v NP2612A v NP3420A v NP3438A v NP3650A v NP4580A	Hexanoyl-CoA:acetyl-CoA C-acyltransferase
R04748	1 (S)-Hydroxyhexanoyl-CoA + 1 NAD+ <=> 1 3-Oxohexanoyl-CoA + 1 NADH + 1 H+	1 C05268 + 1 C00003 <=> 1 C05269 + 1 C00004 + 1 C00080	1.1.1.35	NP1906A NP2754A NP2630A NP4322A	NP1906A v NP2754A v NP2630A v NP4322A	(S)-Hydroxyhexanoyl-CoA:NAD+ oxidoreductase
R04749	1 (S)-Hydroxyhexanoyl-CoA <=> 1 trans-Hex-2-enoyl-CoA + 1 H2O	1 C05268 <=> 1 C05271 + 1 C00001	4.2.1.17	NP0032A NP1462A NP2632A NP2754A NP2758A NP2936A NP3434A NP3830A NP4248A NP4322A	NP0032A v NP1462A v NP2632A v NP2754A v NP2758A v NP2936A v NP3434A v NP3830A v NP4248A v NP4322A	(S)-Hydroxyhexanoyl-CoA hydro-lyase
R04751	1 Hexanoyl-CoA + 1 FAD => 1 trans-Hex-2-enoyl-CoA + 1 FADH2	1 C05270 + 1 C00016 => 1 C05271 + 1 C01352	1.3.99.3	NP1596A NP1754A NP1870A NP2620A NP2628A NP2934A NP3004A NP3460A NP4050A NP4214A NP4254A NP6180A	NP1596A v NP1754A v NP1870A v NP2620A v NP2628A v NP2934A v NP3004A v NP3460A v NP4050A v NP4214A v NP4254A v NP6180A	Hexanoyl-CoA:(acceptor) 2,3-oxidoreductase
R04754	1 Decanoyl-CoA + 1 FAD => 1 trans-Dec-2-enoyl-CoA + 1 FADH2	1 C05274 + 1 C00016 => 1 C05275 + 1 C01352	1.3.99.3	NP1596A NP1754A NP1870A NP2620A NP2628A NP2934A NP3004A NP3460A NP4050A NP4214A NP4254A NP6180A	NP1596A v NP1754A v NP1870A v NP2620A v NP2628A v NP2934A v NP3004A v NP3460A v NP4050A v NP4214A v NP4254A v NP6180A	Decanoyl-CoA:(acceptor) 2,3-oxidoreductase
R04780	1 H2O + 1 D-Fructose 1,6-bisphosphate => 1 Orthophosphate + 1 D-Fructose 6-phosphate	1 C00001 + 1 C00354 => 1 C00009 + 1 C00085	3.1.3.11	NP1592A	NP1592A	beta-D-Fructose 1,6-bisphosphate 1-phosphohydrolase
R04786	1 Phytoene => 1 Phytofluene + 1 Hydrogen	1 C05413 => 1 C05414 + 1 C00282		NP4764A NP0204A NP1630A	NP4764A v NP0204A v NP1630A	CrtI
R04787	1 Phytofluene => 1 zeta-Carotene + 2 H+	1 C05414 => 1 C05430 + 2 C00080		NP4764A NP0204A NP1630A	NP4764A v NP0204A v NP1630A	CrtI
R04798	1 zeta-Carotene => 1 Neurosporene + 1 Hydrogen	1 C05430 => 1 C05431 + 1 C00282	1.14.99.30	NP4764A NP0204A NP1630A	NP4764A v NP0204A v NP1630A
R04800	1 Neurosporene + 1 Oxygen + 1 NADPH + 1 H+ => 1 Lycopene + 2 H2O + 1 NADP+	1 C05431 + 1 C00007 + 1 C00005 + 1 C00080 => 1 C05432 + 2 C00001 + 1 C00006	1.14.99.30	NP4764A NP0204A NP1630A	NP4764A v NP0204A v NP1630A	Neurosporene, hydrogen-donor:oxygen oxidoreductase
R04859	1 O-Acetyl-L-serine + 1 Thiosulfate + 1 Thioredoxin => 1 L-Cysteine + 1 Sulfite + 1 Oxidized thioredoxin + 1 Acetate + 1 H+	1 C00979 + 1 C00320 + 1 C00342 => 1 C00097 + 1 C00094 + 1 C00343 + 1 C00033 + 1 C00080	2.5.1.47 2.5.1.49	NP3116A NP4748A	NP3116A v NP4748A	O3-Acetyl-L-serine acetate-lyase (adding hydrogen sulfide)
R04993	1 2-Demethylmenaquinone + 1 S-Adenosyl-L-methionine => 1 Menaquinone + 1 S-Adenosyl-L-homocysteine + 1 H+	1 C05818 + 1 C00019 => 1 C00828 + 1 C00021 + 1 C00080	2.1.1.-	NP5034A	NP5034A
R05046	1 Formamidopyrimidine nucleoside triphosphate + 1 H2O => 1 2,5-Diaminopyrimidine nucleoside triphosphate + 1 Formate + 1 H+	1 C05922 + 1 C00001 => 1 C05923 + 1 C00058 + 1 C00080	3.5.4.16			Formamidopyrimidine nucleoside triphosphate 7,8-8,9-dihydrolase
R05048	1 2,5-Diaminopyrimidine nucleoside triphosphate => 1 2,5-Diamino-6-(5'-triphosphoryl-3',4'-trihydroxy-2'-oxopentyl)-	1 C05923 => 1 C06148	3.5.4.16			GTP 7,8-8,9-dihydrolase
R05064	1 (S)-3-Hydroxyisobutyryl-CoA + 1 H2O => 1 CoA + 1 (S)-3-Hydroxyisobutyrate + 1 H+	1 C06000 + 1 C00001 => 1 C00010 + 1 C06001 + 1 C00080	3.1.2.4	NP3434A NP2754A NP2936A NP4322A NP1462A NP0032A NP2632A NP3830A
R05066	1 (S)-3-Hydroxyisobutyrate + 1 NAD+ <=> 1 (S)-Methylmalonate semialdehyde + 1 NADH + 1 H+	1 C06001 + 1 C00003 <=> 1 C06002 + 1 C00004 + 1 C00080	1.1.1.35	NP1906A NP2754A NP2630A NP4322A		3-Hydroxy-2-methylpropanoate:NAD+ oxidoreductase
R05068	1 (R)-2,3-Dihydroxy-3-methylpentanoate + 1 NADP+ <=> 1 NADPH + 1 (R)-3-Hydroxy-3-methyl-2-oxopentanoate + 1 H+	1 C06007 + 1 C00006 <=> 1 C00005 + 1 C14463 + 1 C00080	1.1.1.86	NP2198A	NP2198A	(R)-2,3-Dihydroxy-3-methylpentanoate:NADP+ oxidoreductase (isomerizing)
R05069	1 (S)-2-Aceto-2-hydroxybutanoate <=> 1 (R)-3-Hydroxy-3-methyl-2-oxopentanoate	1 C06006 <=> 1 C14463	1.1.1.86	NP2198A	NP2198A	(S)-2-Aceto-2-hydroxybutanoate:NADP+ oxidoreductase (isomerizing)
R05070	1 (R)-2,3-Dihydroxy-3-methylpentanoate => 1 (3R)-3-Methyl-2-oxopentanoic acid + 1 H2O	1 C06007 => 1 C06008 + 1 C00001	4.2.1.9	NP4926A	NP4926A	(R)-2,3-Dihydroxy-3-methylpentanoate hydro-lyase
R05071	1 (S)-2-Acetolactate <=> 1 3-Hydroxy-3-methyl-2-oxobutanoic acid	1 C06010 <=> 1 C04181	1.1.1.86	NP2198A	NP2198A	(S)-2-Acetolactate methylmutase
R05218	1 Cob(II)yrinate a,c diamide + 1 NADH <=> 1 Cob(I)yrinate a,c diamide + 1 NAD+ + 1 H+	1 C06504 + 1 C00004 <=> 1 C06505 + 1 C00003 + 1 C00080	1.16.8.1
R05220	1 Cob(I)yrinate a,c diamide + 1 ATP + 1 H2O <=> 1 Adenosyl cobyrinate a,c diamide + 1 Pyrophosphate + 1 Orthophosphate + 1 H+	1 C06505 + 1 C00002 + 1 C00001 <=> 1 C06506 + 1 C00013 + 1 C00009 + 1 C00080	2.5.1.17	NP4974A	NP4974A
R05221	1 Adenosyl cobinamide + 1 ATP <=> 1 Adenosyl cobinamide phosphate + 1 ADP + 1 H+	1 C06508 + 1 C00002 <=> 1 C06509 + 1 C00008 + 1 C00080	2.7.1.156
R05222	1 Adenosyl cobinamide phosphate + 1 GTP <=> 1 Adenosine-GDP-cobinamide + 1 Pyrophosphate	1 C06509 + 1 C00044 <=> 1 C06510 + 1 C00013	2.7.7.62
R05223	1 Adenosine-GDP-cobinamide + 1 alpha-Ribazole => 1 Cobamide coenzyme + 1 GMP + 1 H+	1 C06510 + 1 C05775 => 1 C00194 + 1 C00144 + 1 C00080	2.7.8.26	NP5306A	NP5306A
R05225	1 Adenosyl cobyrinate a,c diamide + 4 L-Glutamine + 4 ATP + 4 H2O <=> 1 Adenosyl cobyrinate hexaamide + 4 L-Glutamate + 4 Orthophosphate + 4 ADP + 4 H+	1 C06506 + 4 C00064 + 4 C00002 + 4 C00001 <=> 1 C06507 + 4 C00025 + 4 C00009 + 4 C00008 + 4 C00080	6.3.5.10	NP5126A	NP5126A
R05226	1 Adenosyl cobyrinate hexaamide + 1 1-Aminopropan-2-ol <=> 1 Adenosyl cobinamide + 1 H2O	1 C06507 + 1 C05771 <=> 1 C06508 + 1 C00001	6.3.1.10	NP5308A	NP5308A
R05341	1 Lycopene => 1 gamma-Carotene	1 C05432 => 1 C05435		NP0652A	NP0652A	Lycopene cyclase
R05553	1 4-amino-4-deoxychorismate <=> 1 4-Aminobenzoate + 1 Pyruvate + 1 H+	1 C11355 <=> 1 C00568 + 1 C00022 + 1 C00080	4.1.3.38			4-amino-4-deoxychorismate pyruvate-lyase
R05575	1 (Hydroxymethylphenyl)succinyl-CoA + 1 NAD+ <=> 1 Benzoylsuccinyl-CoA + 1 NADH + 1 H+	1 C09819 + 1 C00003 <=> 1 C09820 + 1 C00004 + 1 C00080	1.1.1.35	NP1906A NP2754A NP2630A NP4322A		(3S)-3-Hydroxyacyl-CoA:NAD+ oxidoreductase
R05577	1 tRNA(Asp) + 1 L-Aspartate + 1 ATP => 1 L-Aspartyl-tRNA(Asp) + 1 Pyrophosphate + 1 AMP + 1 H+	1 C01638 + 1 C00049 + 1 C00002 => 1 C02984 + 1 C00013 + 1 C00020 + 1 C00080	6.1.1.12	NP1168A	NP1168A	L-Aspartate:tRNA(Asp) ligase (AMP-forming)
R05578	1 tRNA(Glu) + 1 L-Glutamate + 1 ATP => 1 L-Glutamyl-tRNA(Glu) + 1 Pyrophosphate + 1 AMP + 1 H+	1 C01641 + 1 C00025 + 1 C00002 => 1 C02987 + 1 C00013 + 1 C00020 + 1 C00080	6.1.1.17	NP3694A	NP3694A	L-Glutamate:tRNA(Glu) ligase (AMP-forming)
R05595	1 Crotonoyl-CoA + 1 H2O <=> 1 3-Hydroxybutanoyl-CoA	1 C00877 + 1 C00001 <=> 1 C05116	4.2.1.17	NP0032A NP0488A NP0916A NP1462A NP2256A NP2632A NP2754A NP2758A NP2936A NP3434A NP3830A NP4248A NP4322A
R05611	1 all-trans-Heptaprenyl diphosphate + 1 Isopentenyl diphosphate => 1 all-trans-Octaprenyl diphosphate + 1 Pyrophosphate + 1 H+	1 C04216 + 1 C00129 => 1 C04146 + 1 C00013 + 1 C00080	2.5.1.11	NP0604A NP4556A
R05612	1 all-trans-Hexaprenyl diphosphate + 1 Isopentenyl diphosphate => 1 all-trans-Heptaprenyl diphosphate + 1 Pyrophosphate + 1 H+	1 C01230 + 1 C00129 => 1 C04216 + 1 C00013 + 1 C00080	2.5.1.30	NP0604A NP4556A
R05613	1 all-trans-Pentaprenyl diphosphate + 1 Isopentenyl diphosphate => 1 all-trans-Hexaprenyl diphosphate + 1 Pyrophosphate + 1 H+	1 C04217 + 1 C00129 => 1 C01230 + 1 C00013 + 1 C00080	2.5.1.33	NP4556A NP0604A
R05617	1 1,4-Dihydroxy-2-naphthoate + 1 all-trans-Octaprenyl diphosphate => 1 2-Demethylmenaquinone + 1 Pyrophosphate + 1 CO2 + 2 H+	1 C03657 + 1 C04146 => 1 C05818 + 1 C00013 + 1 C00011 + 2 C00080	2.5.1.-	NP2734A	NP2734A
R05679	1 Glycerol 1-phosphate + 1 NAD+ <=> 1 Glycerone phosphate + 1 NADH + 1 H+	1 C00623 + 1 C00003 <=> 1 C00111 + 1 C00004 + 1 C00080	1.1.1.261	NP4492A	NP4492A
R05807	1 Sirohydrochlorin + 1 Cobalt <=> 1 Cobalt-precorrin 2 + 2 H+	1 C05778 + 1 C00175 <=> 1 C11538 + 2 C00080	4.99.1.3	NP1092A NP1108A NP1588A	NP1092A v NP1108A
R05808	1 Cobalt-precorrin 2 + 1 S-Adenosyl-L-methionine + 1 H+ <=> 1 Cobalt-precorrin 3 + 1 S-Adenosyl-L-homocysteine	1 C11538 + 1 C00019 + 1 C00080 <=> 1 C11539 + 1 C00021	2.1.1.130	NP1122A	NP1122A
R05809	1 Cobalt-precorrin 3 + 1 S-Adenosyl-L-methionine <=> 1 Cobalt-precorrin 4 + 1 S-Adenosyl-L-homocysteine	1 C11539 + 1 C00019 <=> 1 C11540 + 1 C00021	2.1.1.131	NP1114A NP1116A	NP1114A v NP1116A
R05810	1 Cobalt-precorrin 4 + 1 S-Adenosyl-L-methionine <=> 1 Cobalt-precorrin 5 + 1 S-Adenosyl-L-homocysteine	1 C11540 + 1 C00019 <=> 1 C11541 + 1 C00021	2.1.1.133	NP1120A	NP1120A
R05811	1 Cobalt-precorrin 5 + 1 S-Adenosyl-L-methionine + 1 H2O <=> 1 Cobalt-precorrin 6 + 1 S-Adenosyl-L-homocysteine + 1 Acetaldehyde + 2 H+	1 C11541 + 1 C00019 + 1 C00001 <=> 1 C11542 + 1 C00021 + 1 C00084 + 2 C00080	2.1.1.-	NP1118A	NP1118A
R05812	1 Cobalt-precorrin 6 + 1 NADPH + 1 H+ <=> 1 Cobalt-dihydro-precorrin 6 + 1 NADP+	1 C11542 + 1 C00005 + 1 C00080 <=> 1 C11543 + 1 C00006	1.3.1.54
R05813	1 Cobalt-dihydro-precorrin 6 + 2 S-Adenosyl-L-methionine <=> 1 Cobalt-precorrin 8 + 2 S-Adenosyl-L-homocysteine + 1 CO2 + 1 H+	1 C11543 + 2 C00019 <=> 1 C11545 + 2 C00021 + 1 C00011 + 1 C00080	2.1.1.132	NP1088A NP1124A
R05814	1 Cobalt-precorrin 8 <=> 1 Cobyrinate	1 C11545 <=> 1 C05773	5.4.1.2	NP1090A	NP1090A
R05815	1 Cobyrinate + 2 L-Glutamine + 2 ATP + 2 H2O <=> 1 Cob(II)yrinate a,c diamide + 2 L-Glutamate + 2 ADP + 2 Orthophosphate + 2 H+	1 C05773 + 2 C00064 + 2 C00002 + 2 C00001 <=> 1 C06504 + 2 C00025 + 2 C00008 + 2 C00009 + 2 C00080	6.3.1.-	NP0738A	NP0738A
R06529	1 Adenosyl cobyrinate hexaamide + 1 D-1-Aminopropan-2-ol O-phosphate + 1 ATP <=> 1 Adenosyl cobinamide phosphate + 1 ADP + 1 Orthophosphate + 1 H+	1 C06507 + 1 C04122 + 1 C00002 <=> 1 C06509 + 1 C00008 + 1 C00009 + 1 C00080	6.3.1.10	NP5308A	NP5308A
R06530	1 L-Threonine O-3-phosphate + 2 H+ <=> 1 D-1-Aminopropan-2-ol O-phosphate + 1 CO2	1 C12147 + 2 C00080 <=> 1 C04122 + 1 C00011	4.1.1.81
R06531	1 L-Threonine <=> 1 L-Threonine O-3-phosphate	1 C00188 <=> 1 C12147				0
R06558	1 Adenosyl cobinamide + 1 GTP <=> 1 Adenosyl cobinamide phosphate + 1 GDP + 1 H+	1 C06508 + 1 C00044 <=> 1 C06509 + 1 C00035 + 1 C00080	2.7.1.156
R06836	1 D-Ribose 1,5-bisphosphate + 1 ATP <=> 1 5-Phospho-alpha-D-ribose 1-diphosphate + 1 ADP	1 C01151 + 1 C00002 <=> 1 C00119 + 1 C00008	2.7.4.23
R06860	1 2-Oxoglutarate + 1 Isochorismate + 1 H+ => 1 2-Succinyl-6-hydroxy-2,4-cyclohexadiene-1-carboxylate + 1 Pyruvate + 1 CO2	1 C00026 + 1 C00885 + 1 C00080 => 1 C05817 + 1 C00022 + 1 C00011	2.5.1.64	NP2726A	NP2726A	isochorismate:2-oxoglutarate:cyclodienyltransferase(decarboxylating, pyruvate-forming)
R06895	1 Coproporphyrinogen III + 2 S-Adenosyl-L-methionine <=> 1 Protoporphyrinogen IX + 2 CO2 + 2 L-Methionine + 2 5'-Deoxyadenosine	1 C03263 + 2 C00019 <=> 1 C01079 + 2 C00011 + 2 C00073 + 2 C05198	1.3.99.22
R07280	1 5-Amino-6-(5'-phosphoribitylamino)uracil + 1 H2O => 1 4-(1-D-Ribitylamino)-5-amino-2,6-dihydroxypyrimidine + 1 Orthophosphate	1 C04454 + 1 C00001 => 1 C04732 + 1 C00009	3.1.3.-	NP2774A
R07281	1 D-Ribulose 5-phosphate => 1 3, 4-Dihydroxy-2-butanone 4-phosphate + 1 Formate + 1 H+	1 C00199 => 1 C15556 + 1 C00058 + 1 C00080	5.4.99.-	NP0074A	NP0074A
R07459	1 ATP => 1 Thiamine biosynthesis intermediate 4 + 1 Pyrophosphate	1 C00002 => 1 C15813 + 1 C00013				ThiF
R07460	1 L-Cysteine => 1 Thiamine biosynthesis intermediate 3 + 1 L-Alanine	1 C00097 => 1 C15812 + 1 C00041	2.8.1.7	NP0936A NP0790A	NP0936A v NP0790A
R07461	1 Thiamine biosynthesis intermediate 3 + 1 Thiamine biosynthesis intermediate 4 => 1 Thiamine biosynthesis intermediate 5	1 C15812 + 1 C15813 => 1 C15814		NP3782A	NP3782A	ThiI
R07462	1 Thiamine biosynthesis intermediate 5 => 1 C15815	1 C15814 => 1 C15815				ThiF
R07463	1 Glycine => 1 Iminoglycine + 3 H+	1 C00037 => 1 C15809 + 3 C00080	1.4.3.19
R07465	1 C15815 + 1 L-Tyrosine + 1 Iminoglycine => 1 4-Methyl-5-(2-phosphoethyl)-thiazole	1 C15815 + 1 C00082 + 1 C15809 => 1 C04327	ThiG	NP2394A NP2398A
R07618	1 NAD+ + 1 Dihydrolipoylprotein <=> 1 NADH + 1 Lipoylprotein + 1 H+	1 C00003 + 1 C02972 <=> 1 C00004 + 1 C02051 + 1 C00080	1.8.1.4	NP0104A	NP0104A
R07768	1 Octanoyl-[acp] + 2 Sulfur + 2 S-Adenosyl-L-methionine => 1 Lipoyl-[acp] + 2 L-Methionine + 2 5'-Deoxyadenosine	1 C05752 + 2 C00087 + 2 C00019 => 1 C16239 + 2 C00073 + 2 C05198	2.8.1.8	NP0562A	NP0562A
R07769	1 Lipoyl-[acp] + 1 Apoprotein => 1 Protein N6-(lipoyl)lysine + 1 Acyl-carrier protein	1 C16239 + 1 C16240 => 1 C16237 + 1 C00229	2.3.1.181	NP0556A
R07770	1 ATP + 1 Lipoate => 1 Pyrophosphate + 1 Lipoyl-AMP	1 C00002 + 1 C00725 => 1 C00013 + 1 C16238	2.7.7.63	NP5116A	NP5116A
R07771	1 Lipoyl-AMP + 1 Apoprotein => 1 Protein N6-(lipoyl)lysine + 1 AMP + 1 H+	1 C16238 + 1 C16240 => 1 C16237 + 1 C00020 + 1 C00080	2.7.7.63	NP5116A	NP5116A
R10001	1 D-Glucose + 1 NADP+ => 1 D-Glucono-1,5-lactone + 1 NADPH + 1 H+	1 C00031 + 1 C00006 => 1 C00198 + 1 C00005 + 1 C00080	1.1.1.119	NP0126A NP0254A
R10003	1 Geranylgeranyl diphosphate + 1 Isopentenyl diphosphate => 1 all-trans-Pentaprenyl diphosphate + 1 Pyrophosphate + 1 H+	1 C00353 + 1 C00129 => 1 C04217 + 1 C00013 + 1 C00080	2.5.1.-	NP3696A NP0604A
R90000	1 NADH + 1 Menaquinone + 5 H+ => 1 NAD+ + 1 Menaquinol + 4 H+ (pmf associated)	1 C00004 + 1 C00828 + 5 C00080 => 1 C00003 + 1 C05819 + 4 C90000	1.6.5.3	NP2292A NP2294A NP2296A NP2298A NP2300A NP2304A NP2306A NP2308A NP2310A NP2312A NP2314A NP2406A NP3508A	NP2292A ^ NP2294A ^ NP2296A ^ NP2298A ^ NP2300A ^ NP2304A ^ NP2306A ^ NP2308A ^ NP2310A ^ NP2312A ^ NP2314A ^ NP2406A ^ NP3508A	Oxid Phos: C I (NADH)
R90001	1 Menaquinol + 2 H+ + 2 Halocyanin (oxidized) => 1 Menaquinone + 2 H+ (pmf associated) + 2 Halocyanin (reduced)	1 C05819 + 2 C00080 + 2 C90014 => 1 C00828 + 2 C90000 + 2 C90015	1.10.2.2			Oxid Phos: Complex III Cytochrome bc1 complex
R90002	1 Oxygen + 4 Halocyanin (reduced) + 4 H+ => 2 H2O + 4 H+ (pmf associated) + 4 Halocyanin (oxidized)	1 C00007 + 4 C90015 + 4 C00080 => 2 C00001 + 4 C90000 + 4 C90014	1.9.3.1	NP2448A NP2450A NP2456A NP2962A NP2964A NP2966A NP2968A NP4294A NP4296A	NP2448A ^ NP2450A ^ NP2456A ^ NP2962A ^ NP2964A ^ NP2966A ^ NP2968A ^ NP4294A ^ NP4296A	Oxid Phos: Complex IV
R90003	1 ADP + 1 Orthophosphate + 10 H+ (pmf associated) <=> 1 ATP + 1 H2O + 9 H+	1 C00008 + 1 C00009 + 10 C90000 <=> 1 C00002 + 1 C00001 + 9 C00080	3.6.3.14	NP0264A NP1018A NP1020A NP1022A NP1024A NP1026A NP1028A NP1030A NP1032A	NP0264A ^ NP1018A ^ NP1020A ^ NP1022A ^ NP1024A ^ NP1026A ^ NP1028A ^ NP1030A ^ NP1032A	Oxid Phos: Complex V ATP Synthase
R90004	1 Reduced ferredoxin + 1 Menaquinone + 3 H+ => 1 Oxidized ferredoxin + 1 Menaquinol + 2 H+ (pmf associated)	1 C00138 + 1 C00828 + 3 C00080 => 1 C00139 + 1 C05819 + 2 C90000	1.6.5.3	NP2292A NP2294A NP2296A NP2298A NP2300A NP2304A NP2306A NP2308A NP2310A NP2312A NP2314A NP2406A NP3508A	NP2292A ^ NP2294A ^ NP2296A ^ NP2298A ^ NP2300A ^ NP2304A ^ NP2306A ^ NP2308A ^ NP2310A ^ NP2312A ^ NP2314A ^ NP2406A ^ NP3508A	Oxid Phos: C I (Ferredoxin)
R90030	1 L-Cysteine (E) + 1 H+ (pmf associated) <=> 1 L-Cysteine + 1 H+	1 CE00097 + 1 C90000 <=> 1 C00097 + 1 C00080		NP0166A NP0168A NP0170A NP0172A NP0174A NP1464A NP1466A NP1468A NP1470A NP1472A NP2002A NP3424A NP3426A NP3428A NP3430A NP3432A NP3644A NP4132A NP4134A NP4136A NP4138A NP4140A NP6190A NP6192A NP6194A NP6196A NP6198A		Symport: (L-Cysteine:H+)
R90031	1 L-Arginine (E) + 1 H+ (pmf associated) => 1 L-Arginine + 1 H+	1 CE00062 + 1 C90000 => 1 C00062 + 1 C00080		NP0040A NP0042A NP0646A NP2382A NP2676A NP4372A NP6260A NP1776A NP1778A NP1780A		Symport: (L-Arginine:H+)
R90032	1 L-Tyrosine (E) + 1 H+ (pmf associated) <=> 1 L-Tyrosine + 1 H+	1 CE00082 + 1 C90000 <=> 1 C00082 + 1 C00080				Symport: (L-Tyrosine:H+)
R90033	1 L-Methionine (E) + 1 H+ (pmf associated) <=> 1 L-Methionine + 1 H+	1 CE00073 + 1 C90000 <=> 1 C00073 + 1 C00080				Symport: (L-Methionine:H+)
R90035	1 L-Aspartate (E) + 1 H+ (pmf associated) <=> 1 L-Aspartate + 1 H+	1 CE00049 + 1 C90000 <=> 1 C00049 + 1 C00080		NP1776A NP1778A NP1780A		Symport: (L-Aspartate:H+)
R90036	1 L-Glutamate (E) + 1 H+ (pmf associated) <=> 1 L-Glutamate + 1 H+	1 CE00025 + 1 C90000 <=> 1 C00025 + 1 C00080		NP1776A NP1778A NP1780A		Symport: (L-Glutamate:H+)
R90037	1 L-Glutamine (E) + 1 H+ (pmf associated) <=> 1 L-Glutamine + 1 H+	1 CE00064 + 1 C90000 <=> 1 C00064 + 1 C00080		NP0166A NP0168A NP0170A NP0172A NP0174A NP1464A NP1466A NP1468A NP1470A NP1472A NP2002A NP3424A NP3426A NP3428A NP3430A NP3432A NP3644A NP4132A NP4134A NP4136A NP4138A NP4140A NP6190A NP6192A NP6194A NP6196A NP6198A NP1776A NP1778A NP1780A		Symport: (L-Glutamine:H+)
R90038	1 L-Tryptophan (E) + 1 H+ (pmf associated) <=> 1 L-Tryptophan + 1 H+	1 CE00078 + 1 C90000 <=> 1 C00078 + 1 C00080				Symport: (Tryptophan:H+)
R90039	1 L-Histidine (E) + 1 H+ (pmf associated) <=> 1 L-Histidine + 1 H+	1 CE00135 + 1 C90000 <=> 1 C00135 + 1 C00080		NP0040A NP0042A NP0646A NP2382A NP2676A NP4372A NP6260A		Symport: (L-Histidine:H+)
R90040	1 L-Lysine (E) + 1 H+ (pmf associated) <=> 1 L-Lysine + 1 H+	1 CE00047 + 1 C90000 <=> 1 C00047 + 1 C00080		NP0040A NP0042A NP0646A NP2382A NP2676A NP4372A NP6260A NP1776A NP1778A NP1780A		Symport: (L-Lysine:H+)
R90041	1 L-Phenylalanine (E) + 1 H+ (pmf associated) <=> 1 L-Phenylalanine + 1 H+	1 CE00079 + 1 C90000 <=> 1 C00079 + 1 C00080				Symport: (L-Phenylalanine:H+)
R90042	1 L-Asparagine (E) + 1 H+ (pmf associated) <=> 1 L-Asparagine + 1 H+	1 CE00152 + 1 C90000 <=> 1 C00152 + 1 C00080		NP0166A NP0168A NP0170A NP0172A NP0174A NP1464A NP1466A NP1468A NP1470A NP1472A NP2002A NP3424A NP3426A NP3428A NP3430A NP3432A NP3644A NP4132A NP4134A NP4136A NP4138A NP4140A NP6190A NP6192A NP6194A NP6196A NP6198A NP1776A NP1778A NP1780A		Symport: (L-Asparagine:H+)
R90043	1 L-Isoleucine (E) + 1 H+ (pmf associated) <=> 1 L-Isoleucine + 1 H+	1 CE00407 + 1 C90000 <=> 1 C00407 + 1 C00080		NP0166A NP0168A NP0170A NP0172A NP0174A NP1464A NP1466A NP1468A NP1470A NP1472A NP2002A NP3424A NP3426A NP3428A NP3430A NP3432A NP3644A NP4132A NP4134A NP4136A NP4138A NP4140A NP6190A NP6192A NP6194A NP6196A NP6198A		Symport: (L-Isoleucine:H+)
R90044	1 L-Serine (E) + 1 H+ (pmf associated) <=> 1 L-Serine + 1 H+	1 CE00065 + 1 C90000 <=> 1 C00065 + 1 C00080		NP0166A NP0168A NP0170A NP0172A NP0174A NP1464A NP1466A NP1468A NP1470A NP1472A NP2002A NP3424A NP3426A NP3428A NP3430A NP3432A NP3644A NP4132A NP4134A NP4136A NP4138A NP4140A NP6190A NP6192A NP6194A NP6196A NP6198A		Symport: (L-Serine:H+)
R90045	1 L-Leucine (E) + 1 H+ (pmf associated) <=> 1 L-Leucine + 1 H+	1 CE00123 + 1 C90000 <=> 1 C00123 + 1 C00080		NP0166A NP0168A NP0170A NP0172A NP0174A NP1464A NP1466A NP1468A NP1470A NP1472A NP2002A NP3424A NP3426A NP3428A NP3430A NP3432A NP3644A NP4132A NP4134A NP4136A NP4138A NP4140A NP6190A NP6192A NP6194A NP6196A NP6198A		Symport: (L-Leucine:H+)
R90046	1 Glycine (E) + 1 H+ (pmf associated) <=> 1 Glycine + 1 H+	1 CE00037 + 1 C90000 <=> 1 C00037 + 1 C00080		NP3588A NP0166A NP0168A NP0170A NP0172A NP0174A NP1464A NP1466A NP1468A NP1470A NP1472A NP2002A NP3424A NP3426A NP3428A NP3430A NP3432A NP3644A NP4132A NP4134A NP4136A NP4138A NP4140A NP6190A NP6192A NP6194A NP6196A NP6198A		Symport: (Glycine:H+)
R90047	1 L-Threonine (E) + 1 H+ (pmf associated) <=> 1 L-Threonine + 1 H+	1 CE00188 + 1 C90000 <=> 1 C00188 + 1 C00080		NP0166A NP0168A NP0170A NP0172A NP0174A NP1464A NP1466A NP1468A NP1470A NP1472A NP2002A NP3424A NP3426A NP3428A NP3430A NP3432A NP3644A NP4132A NP4134A NP4136A NP4138A NP4140A NP6190A NP6192A NP6194A NP6196A NP6198A		Symport: (L-Threonine:H+)
R90048	1 L-Valine (E) + 1 H+ (pmf associated) <=> 1 L-Valine + 1 H+	1 CE00183 + 1 C90000 <=> 1 C00183 + 1 C00080		NP0166A NP0168A NP0170A NP0172A NP0174A NP1464A NP1466A NP1468A NP1470A NP1472A NP2002A NP3424A NP3426A NP3428A NP3430A NP3432A NP3644A NP4132A NP4134A NP4136A NP4138A NP4140A NP6190A NP6192A NP6194A NP6196A NP6198A		Symport: (L-Valine:H+)
R90049	1 L-Alanine (E) + 1 H+ (pmf associated) <=> 1 L-Alanine + 1 H+	1 CE00041 + 1 C90000 <=> 1 C00041 + 1 C00080				Symport: (Alanine:H+)
R90050	1 Iron (E) + 1 H2O + 1 ATP => 1 Iron + 1 ADP + 1 H+ + 1 Orthophosphate	1 CE00023 + 1 C00001 + 1 C00002 => 1 C00023 + 1 C00008 + 1 C00080 + 1 C00009		NP3816A NP3818A NP5004A NP5000A		ABC-T: Iron
R90052	1 Nitrate (E) + 1 H+ (pmf associated) => 1 Nitrate + 1 H+	1 CE00244 + 1 C90000 => 1 C00244 + 1 C00080		NP4228A NP4808A		Symport: (Nitrate: H+)
R90053	1 Orthophosphate (E) + 1 ATP + 1 H2O => 1 ADP + 1 H+ + 2 Orthophosphate	1 CE00009 + 1 C00002 + 1 C00001 => 1 C00008 + 1 C00080 + 2 C00009		NP1978A NP1980A NP1982A NP1984A NP6098A NP6100A NP6102A NP6104A NP1270A NP1412A		ABC-T: Orthophosphate
R90054	1 Orthophosphate (E) + 1 H+ (pmf associated) => 1 Orthophosphate + 1 H+	1 CE00009 + 1 C90000 => 1 C00009 + 1 C00080		NP1270A NP1412A NP1978A NP1980A NP1982A NP1984A NP4804A NP6098A NP6100A NP6102A NP6104A		Symport: (Orthophosphate:H+)
R90055	1 Sulfate (E) + 1 ATP + 1 H2O => 1 Sulfate + 1 ADP + 1 Orthophosphate + 1 H+	1 CE00059 + 1 C00002 + 1 C00001 => 1 C00059 + 1 C00008 + 1 C00009 + 1 C00080		NP1412A NP3040A NP3042A NP3044A NP3046A NP3928A NP3930A NP3932A		ABC-T: (Sulfate)
R90056	1 Folate (E) + 1 H+ (pmf associated) => 1 Folate + 1 H+	1 CE00504 + 1 C90000 => 1 C00504 + 1 C00080				Symport: (Folate:H+)
R90057	1 Thiamin (E) + 1 ATP + 1 H2O => 1 Thiamin + 1 ADP + 1 Orthophosphate + 1 H+	1 CE00378 + 1 C00002 + 1 C00001 => 1 C00378 + 1 C00008 + 1 C00009 + 1 C00080				ABC-T: (Thiamin)
R90058	1 Biotin (E) + 1 H+ (pmf associated) => 1 Biotin + 1 H+	1 CE00120 + 1 C90000 => 1 C00120 + 1 C00080				Symport: (Biotin:H+)
R90059	1 Cobalt (E) + 1 ATP + 1 H2O => 1 Cobalt + 1 ADP + 1 Orthophosphate + 1 H+	1 CE00175 + 1 C00002 + 1 C00001 => 1 C00175 + 1 C00008 + 1 C00009 + 1 C00080		NP1396A NP1394A NP1398A		ABC-T: (Cobalt)
R90060	1 FADH2 + 1 Menaquinone => 1 FAD + 1 Menaquinol	1 C01352 + 1 C00828 => 1 C00016 + 1 C05819	1.3.99.1	NP4264A NP4266A NP4268A NP4270A	NP4264A ^ NP4266A ^ NP4268A ^ NP4270A
R90061	1 L-Ornithine => 1 L-Ornithine (E)	1 C00077 => 1 CE00077				Excretion: (L-Ornithine)
R90062	1 L-Ornithine + 1 L-Arginine (E) => 1 L-Ornithine (E) + 1 L-Arginine	1 C00077 + 1 CE00062 => 1 CE00077 + 1 C00062				Antiport: (Ornithine:L-Arginine)
R90064	1 2,3-Bis-O-(geranylgeranyl)glycerol 1-phosphate + 1 H2O + 8 NADPH + 8 H+ => 1 2,3-Di-O-phytanyl-sn-glycerol + 1 Orthophosphate + 8 NADP+	1 C04638 + 1 C00001 + 8 C00005 + 8 C00080 => 1 C13863 + 1 C00009 + 8 C00006				Archaeol Synthesis Geranylgeranyl chain reductions.
R90066	1 Sodium (E) => 1 Sodium	1 CE01330 => 1 C01330				Influx Diffusion: (Na+)
R90068	1 Potassium (E) => 1 Potassium	1 CE00238 => 1 C00238		NP0220A NP0330A NP0332A NP3602A NP3604A NP4902A NP4904A NP4906A NP6110A NP6112A		Influx: (Potassium)
R90069	1 L-Ornithine (E) + 1 H+ (pmf associated) => 1 L-Ornithine + 1 H+	1 CE00077 + 1 C90000 => 1 C00077 + 1 C00080				Symport: (L-Ornithine:H+)
R90070	1 H2O (E) <=> 1 H2O	1 CE00001 <=> 1 C00001				Diffusion: (H2O)
R90071	1 CO2 (E) <=> 1 CO2	1 CE00011 <=> 1 C00011				Diffusion: (CO2)
R90072	1 Oxygen (E) <=> 1 Oxygen	1 CE00007 <=> 1 C00007				Diffusion: (Oxygen)
R90073	1 Hydrogen (E) <=> 1 Hydrogen	1 CE00282 <=> 1 C00282				Diffusion: (Hydrogen)
R90074	1 NH3 (E) <=> 1 NH3	1 CE00014 <=> 1 C00014		NP0922A		Reversible-T: (Ammonia)
R90075	1 D-Ribose (E) + 1 ATP + 1 H2O => 1 D-Ribose + 1 ADP + 1 Orthophosphate + 1 H+	1 CE00121 + 1 C00002 + 1 C00001 => 1 C00121 + 1 C00008 + 1 C00009 + 1 C00080				ABC-T: (D-Ribose)
R90076	1 Glycerol 1-phosphate (E) + 1 H+ (pmf associated) <=> 1 Glycerol 1-phosphate + 1 H+	1 CE00623 + 1 C90000 <=> 1 C00623 + 1 C00080				Symport: (Glycerol 1-P:H+)
R90078	1 Oxalate (E) + 1 Formate => 1 Oxalate + 1 Formate (E)	1 CE00209 + 1 C00058 => 1 C00209 + 1 CE00058		NP3798A		Antiport: (Oxalate:Formate)
R90079	1 Cl- => 1 Cl- (E)	1 C00698 => 1 CE00698				Diffusion: (Cl-)
R90080	1 Adenosine (E) + 1 H+ (pmf associated) <=> 1 Adenosine + 1 H+	1 CE00212 + 1 C90000 <=> 1 C00212 + 1 C00080		NP1252A		Symport: (Adenosine:H+)
R90081	1 Thymidine (E) + 1 H+ (pmf associated) <=> 1 Thymidine + 1 H+	1 CE00214 + 1 C90000 <=> 1 C00214 + 1 C00080				Symport: (Thymidine:H+)
R90082	1 Cytidine (E) + 1 H+ (pmf associated) <=> 1 Cytidine + 1 H+	1 CE00475 + 1 C90000 <=> 1 C00475 + 1 C00080				Symport: (Cytidine:H+)
R90083	1 Guanosine (E) + 1 H+ (pmf associated) <=> 1 Guanosine + 1 H+	1 CE00387 + 1 C90000 <=> 1 C00387 + 1 C00080		NP1252A		Symport: (Guanosine:H+)
R90084	1 Deoxyadenosine (E) + 1 H+ (pmf associated) <=> 1 Deoxyadenosine + 1 H+	1 CE00559 + 1 C90000 <=> 1 C00559 + 1 C00080				Symport: (Deoxyadenosine:H+)
R90085	1 Deoxyuridine (E) + 1 H+ (pmf associated) <=> 1 Deoxyuridine + 1 H+	1 CE00526 + 1 C90000 <=> 1 C00526 + 1 C00080				Symport: (Deoxyuridine:H+)
R90086	1 Deoxycytidine (E) + 1 H+ (pmf associated) <=> 1 Deoxycytidine + 1 H+	1 CE00881 + 1 C90000 <=> 1 C00881 + 1 C00080				Symport: (Deoxycytidine:H+)
R90087	1 Deoxyguanosine (E) + 1 H+ (pmf associated) <=> 1 Deoxyguanosine + 1 H+	1 CE00330 + 1 C90000 <=> 1 C00330 + 1 C00080				Symport: (Deoxyguanosine:H+)
R90088	1 Adenosine-GDP-Cobinamide (E) + 1 ATP + 1 H2O => 1 Adenosine-GDP-cobinamide + 1 ADP + 1 Orthophosphate + 1 H+	1 CE06510 + 1 C00002 + 1 C00001 => 1 C06510 + 1 C00008 + 1 C00009 + 1 C00080		NP3814A NP3816A NP3818A		ABC-T: (Adenosine-GDP-Cobinamide)
R90089	1 D-Glucose (E) + 1 ATP + 1 H2O => 1 D-Glucose + 1 ADP + 1 H+ + 1 Orthophosphate	1 CE00031 + 1 C00002 + 1 C00001 => 1 C00031 + 1 C00008 + 1 C00080 + 1 C00009		NP0530A		ABC-T: (D-Glucose)
R90091	1 L-Aspartate 4-semialdehyde + 1 6-Deoxy-5-ketofructose 1-phosphate + 3 H+ => 1 Hydroxypyruvaldehyde 3-P + 1 Compound I	1 C00441 + 1 C16848 + 3 C00080 => 1 C90017 + 1 C90018		NP3160A	NP3160A	MJ0400 Homolog reaction
R90092	1 NAD+ + 1 Compound I => 1 NADH + 1 2-Amino-3,7-dideoxy-D-threo-hept-6-ulosonic acid	1 C00003 + 1 C90018 => 1 C00004 + 1 C16850		NP2238A	NP2238A	MJ1249 homolog reaction
R90093	1 Cobamide coenzyme (E) + 1 ATP + 1 H2O => 1 Cobamide coenzyme + 1 ADP + 1 H+ + 1 Orthophosphate	1 CE00194 + 1 C00002 + 1 C00001 => 1 C00194 + 1 C00008 + 1 C00080 + 1 C00009		NP3814A NP3816A NP3818A		ABC-T: (Cobamide Coenzyme)
R90094	1 D-Galactose (E) + 1 ATP + 1 H2O => 1 D-Galactose + 1 ADP + 1 H+ + 1 Orthophosphate	1 CE00124 + 1 C00002 + 1 C00001 => 1 C00124 + 1 C00008 + 1 C00080 + 1 C00009		NP0530A		ABC-T: (D-Galactose)
R90095	1 Acetate (E) + 1 H+ (pmf associated) <=> 1 Acetate + 1 H+	1 CE00033 + 1 C90000 <=> 1 C00033 + 1 C00080				Symport: (Acetate:H+)
R90097	1 Formate => 1 Formate (E)	1 C00058 => 1 CE00058				Diffusion: (Formate)
R90098	1 Glycerol (E) + 1 ATP + 1 H2O => 1 Glycerol + 1 ADP + 1 Orthophosphate + 1 H+	1 CE00116 + 1 C00002 + 1 C00001 => 1 C00116 + 1 C00008 + 1 C00009 + 1 C00080				ABC-T: (Glycerol)
R90099	1 Cl- (E) + 1 Photon => 1 Cl-	1 CE00698 + 1 C90001 => 1 C00698		NP0642A	NP0642A	Halorhodopsin: (Cl-)
R90100	1 Nitrate (E) + 1 Photon => 1 Nitrate	1 CE00244 + 1 C90001 => 1 C00244		NP0642A	NP0642A	Halorhodopsin: (Nitrate)
R90101	1 Sodium + 2 H+ (pmf associated) => 2 H+ + 1 Sodium (pmf associated)	1 C01330 + 2 C90000 => 2 C00080 + 1 C90004		NP4702A NP1832A		Antiport: (Na+:H+)
R90102	1 3-Phospho-D-Glycerate (E) + 1 ATP + 1 H2O => 1 3-Phospho-D-glycerate + 1 ADP + 1 Orthophosphate + 1 H+	1 CE00197 + 1 C00002 + 1 C00001 => 1 C00197 + 1 C00008 + 1 C00009 + 1 C00080		NP5220A		ABC-T: (3-Phospho-glycerate)
R90103	1 Vitamin B12 (E) + 1 ATP + 1 H2O => 1 Vitamin B12 + 1 ADP + 1 Orthophosphate + 1 H+	1 CE05776 + 1 C00002 + 1 C00001 => 1 C05776 + 1 C00008 + 1 C00009 + 1 C00080		NP3814A NP3816A NP3818A		ABC-T: (Vit B12)
R90104	1 Arsenite (E) + 1 ATP + 1 H2O => 1 Arsenite + 1 ADP + 1 Orthophosphate + 1 H+	1 CE06697 + 1 C00002 + 1 C00001 => 1 C06697 + 1 C00008 + 1 C00009 + 1 C00080		NP1164A NP1382A NP1818A NP6058A		ABC-T: (Arsenite)
R90105	1 ATP + 1 H2O + 1 Copper (E) => 1 ADP + 1 Orthophosphate + 1 H+ + 1 Copper	1 C00002 + 1 C00001 + 1 CE00070 => 1 C00008 + 1 C00009 + 1 C00080 + 1 C00070		NP1080A NP1082A NP1198A NP1200A NP2668A NP2972A NP3140A NP3118A NP3920A NP3924A NP3926A		ABC-T: (Copper)
R90107	1 L-Proline (E) + 1 H+ (pmf associated) <=> 1 L-Proline + 1 H+	1 CE00148 + 1 C90000 <=> 1 C00148 + 1 C00080		NP4534A NP6036A		Symport: (Proline:Na+)
R90108	1 Cl- (E) + 1 H+ (pmf associated) => 1 Cl- + 1 H+	1 CE00698 + 1 C90000 => 1 C00698 + 1 C00080				Symport: (Cl-:H+)
R90109	1 Pantothenate (E) + 1 Sodium (pmf associated) => 1 Pantothenate + 1 Sodium	1 CE00864 + 1 C90004 => 1 C00864 + 1 C01330		NP4534A NP6036A		Symport: (Pantothenate:Na+)
R90110	1 Betaine (E) <=> 1 Betaine	1 CE00719 <=> 1 C00719		NP3588A		Channel: (Betaine)
R90112	1 Cadmium (E) => 1 Cadmium	1 CE01413 => 1 C01413		NP3196A NP0120A NP0258A NP3532A		ABC-T: (Cadmium)
R90113	1 Potassium + 2 H+ (pmf associated) => 1 Potassium (E) + 2 H+	1 C00238 + 2 C90000 => 1 CE00238 + 2 C00080		NP0826A NP0828A NP0830A NP0832A NP0834A NP0836A NP0838A NP0840A NP0842A NP5056A		Antiport: (K+:H+)
R90114	1 Phosphonate (E) + 1 ATP + 1 H2O => 1 Phosphonate + 1 ADP + 1 H+ + 1 Orthophosphate	1 CE06701 + 1 C00002 + 1 C00001 => 1 C06701 + 1 C00008 + 1 C00080 + 1 C00009		NP6126A NP6124A NP6122A		ABC-T: (Phosphonate)
R90116	1 Oligopeptide (E) + 1 ATP + 1 H2O => 1 Oligopeptide + 1 ADP + 1 Orthophosphate + 1 H+	1 CE00098 + 1 C00002 + 1 C00001 => 1 C00098 + 1 C00008 + 1 C00009 + 1 C00080		NP0758A NP0760A NP0762A NP0764A NP0766A NP3578A NP3580A NP3582A NP3584A		ABC-T: (Oligopeptide)
R90117	1 Dipeptide (E) + 1 ATP + 1 H2O => 1 Dipeptide + 1 ADP + 1 Orthophosphate + 1 H+	1 CE00107 + 1 C00002 + 1 C00001 => 1 C00107 + 1 C00008 + 1 C00009 + 1 C00080		NP0758A NP0760A NP0762A NP0764A NP0766A NP3578A NP3580A NP3582A NP3584A		ABC-T: (Dipeptide)
R90118	1 Ferrichrome (E) + 1 ATP + 1 H2O => 1 Ferrichrome + 1 ADP + 1 Orthophosphate + 1 H+	1 CE06228 + 1 C00002 + 1 C00001 => 1 C06228 + 1 C00008 + 1 C00009 + 1 C00080		NP3816A NP3818A		ABC-T: (Ferrichrome)
R90119	1 Zinc (E) + 1 ATP + 1 H2O => 1 Zinc + 1 ADP + 1 Orthophosphate + 1 H+	1 CE00038 + 1 C00002 + 1 C00001 => 1 C00038 + 1 C00008 + 1 C00009 + 1 C00080		NP0258A NP2636A NP3196A NP4402A		ABC-T: (Zinc)
R90120	1 Manganese (E) + 1 ATP + 1 H2O => 1 Manganese + 1 ADP + 1 Orthophosphate + 1 H+	1 CE00034 + 1 C00002 + 1 C00001 => 1 C00034 + 1 C00008 + 1 C00009 + 1 C00080				ABC-T: (Manganese)
R90121	1 Adenine (E) + 1 H+ (pmf associated) <=> 1 Adenine + 1 H+	1 CE00147 + 1 C90000 <=> 1 C00147 + 1 C00080		NP1252A		Symport: (Adenine:H+)
R90122	1 Guanine (E) + 1 H+ (pmf associated) <=> 1 Guanine + 1 H+	1 CE00242 + 1 C90000 <=> 1 C00242 + 1 C00080		NP1252A		Symport: (Guanine:H+)
R90123	1 Hypoxanthine (E) + 1 H+ (pmf associated) <=> 1 Hypoxanthine + 1 H+	1 CE00262 + 1 C90000 <=> 1 C00262 + 1 C00080		NP1252A		Symport: (Hypoxanthine:H+)
R90124	1 L-Citrulline (E) + 1 H+ (pmf associated) <=> 1 L-Citrulline + 1 H+	1 CE00327 + 1 C90000 <=> 1 C00327 + 1 C00080				Symport: (L-Citrulline:H+)
R90125	1 Succinate (E) + 1 H+ (pmf associated) <=> 1 Succinate + 1 H+	1 CE00042 + 1 C90000 <=> 1 C00042 + 1 C00080				Symport: (Succinate:H+)
R90129	1 D-Fructose 1,6-bisphosphate + 1 NAD+ => 1 4-Ketofructose-1,6-bisphosphate + 1 NADH	1 C00354 + 1 C00003 => 1 C90006 + 1 C00004				Fructose-1-6-bisP DH
R90130	1 4-Ketofructose-1,6-bisphosphate + 1 NADH => 1 Orthophosphate + 1 NAD+ + 1 6-Deoxy-5-ketofructose 1-phosphate	1 C90006 + 1 C00004 => 1 C00009 + 1 C00003 + 1 C16848				Shikimate synth. reaction
R90131	1 2-Amino-3,7-dideoxy-D-threo-hept-6-ulosonic acid + 1 H2O + 1 NAD+ => 1 3-Dehydroquinate + 1 NADH + 1 NH3 + 1 H+	1 C16850 + 1 C00001 + 1 C00003 => 1 C00944 + 1 C00004 + 1 C00014 + 1 C00080		NP2238A	NP2238A	MJ1249 homolog reaction
R90132	1 6-Deoxy-5-ketofructose 1-phosphate + 1 NADH + 1 H+ <=> 1 NAD+ + 1 6-Deoxy-5-ketomannitol-1-phosphate	1 C16848 + 1 C00004 + 1 C00080 <=> 1 C00003 + 1 C90019				Alt. Shikimate synth. reaction
R90133	1 L-Aspartate 4-semialdehyde + 1 6-Deoxy-5-ketomannitol-1-phosphate + 1 H+ => 1 D-Glyceraldehyde 3-phosphate + 1 Compound I	1 C00441 + 1 C90019 + 1 C00080 => 1 C00118 + 1 C90018		NP3160A	NP3160A	MJ0400 homolog reaction
R90134	1 Inosine (E) + 1 H+ (pmf associated) <=> 1 Inosine + 1 H+	1 CE00294 + 1 C90000 <=> 1 C00294 + 1 C00080		NP1252A		Symport: (Inosine:H+)
R90138	1 Hexadecanoic acid (E) + 1 ATP + 1 H2O => 1 Hexadecanoic acid + 1 ADP + 1 Orthophosphate + 1 H+	1 CE00249 + 1 C00002 + 1 C00001 => 1 C00249 + 1 C00008 + 1 C00009 + 1 C00080				ABC-T: (Hexadecanoic acid)
R90139	1 GTP + 1 H2O => 1 Cyclic pyranopterin monophosphate + 1 Pyrophosphate + 1 H+	1 C00044 + 1 C00001 => 1 C90010 + 1 C00013 + 1 C00080		NP2822A NP3746A NP1040A	NP2822A ^ NP3746A ^ NP1040A	Molybdopterin biosynthesis
R90140	1 Cyclic pyranopterin monophosphate => 1 Molybdopterin	1 C90010 => 1 C05924		NP2274A NP2500A NP3946A NP5020A NP0052A	NP2274A ^ NP2500A ^ NP3946A ^ NP5020A ^ NP0052A	Molybdopterin biosynthesis
R90141	1 Molybdopterin + 1 ATP => 1 Molybdenum cofactor + 1 AMP + 1 Pyrophosphate	1 C05924 + 1 C00002 => 1 C90011 + 1 C00020 + 1 C00013		NP1440A NP1442A	NP1440A ^ NP1442A	MoCo biosynthesis
R90142	1 Molybdenum cofactor + 1 GTP => 1 MoCo dinucleotide (Guanine) + 1 Pyrophosphate	1 C90011 + 1 C00044 => 1 C90012 + 1 C00013		NP1536A NP2138A	NP1536A ^ NP2138A	MoCo Metabolism
R90143	1 (R)-5-Phosphomevalonate + 1 ATP => 1 Isopentenyl phosphate + 1 ADP + 1 Orthophosphate + 1 CO2	1 C01107 + 1 C00002 => 1 C90016 + 1 C00008 + 1 C00009 + 1 C00011		NP1580A	NP1580A	Phosphomevalonate decarboxylase
R90144	1 Isopentenyl phosphate + 1 ATP => 1 Isopentenyl diphosphate + 1 ADP	1 C90016 + 1 C00002 => 1 C00129 + 1 C00008		NP2852A	NP2852A	Isopentyl phosphate kinase
R90145	1 D-Ribose 1,5-bisphosphate + 1 NAD+ + 1 H+ => 1 D-Ribulose 1,5-bisphosphate + 1 NADH	1 C01151 + 1 C00003 + 1 C00080 => 1 C01182 + 1 C00004		NP5174A NP3202A	NP5174A v NP3202A	MJ0601 Ma2851 Reaction
R90146	1 AMP + 1 Orthophosphate => 1 D-Ribose 1,5-bisphosphate + 1 Adenine	1 C00020 + 1 C00009 => 1 C01151 + 1 C00147		NP3958A	NP3958A	AMP phosphorylase (rib-pp forming)
R90147	1 Molybdenum (E) + 1 ATP + 1 H2O => 1 Molybdenum + 1 ADP + 1 Orthophosphate + 1 H+	1 CE00150 + 1 C00002 + 1 C00001 => 1 C00150 + 1 C00008 + 1 C00009 + 1 C00080				ABC-T: (Molybdenum)
R90148	1 Glycine + 1 Tetrahydropteroyltri-L-glutamate => 1 NH3 + 1 CO2 + 1 5-Methyltetrahydropteroyltri-L-glutamate	1 C00037 + 1 C04144 => 1 C00014 + 1 C00011 + 1 C04489				Met Bio Gap
R90149	1 UDP-D-galactose + 1 H2O => 1 D-Galactose + 1 UDP + 1 H+	1 C00052 + 1 C00001 => 1 C00124 + 1 C00015 + 1 C00080				Gal Synth Gap
R90150	1 (S)-Malate (E) + 1 (R)-Lactate <=> 1 (S)-Malate + 1 (R)-Lactate (E)	1 CE00149 + 1 C00256 <=> 1 C00149 + 1 CE00256		NP4702A NP1832A		Antiport: (Malate:Lactate)
R90151	1 (S)-Malate (E) + 1 H+ (pmf associated) <=> 1 (S)-Malate + 1 H+	1 CE00149 + 1 C90000 <=> 1 C00149 + 1 C00080		NP1278A NP3906A		Symport: (Malate:H+)
R90152	1 (R)-Lactate (E) + 1 H+ (pmf associated) <=> 1 H+ + 1 (R)-Lactate	1 CE00256 + 1 C90000 <=> 1 C00080 + 1 C00256				Symport: (Lactate:H+)
R90153	1 H+ (E) => 1 H+	1 CE00080 => 1 C00080				Influx Diffusion: (H+)
R90154	1 H+ (pmf associated) => 1 H+ (E)	1 C90000 => 1 CE00080				pmf leak: (H+)
R90155	1 Sodium (pmf associated) => 1 Sodium (E)	1 C90004 => 1 CE01330				pmf leak: (Na+)
R90156	1 Fumarate (E) + 1 H+ (pmf associated) <=> 1 Fumarate + 1 H+	1 CE00122 + 1 C90000 <=> 1 C00122 + 1 C00080				Symport: (Fumarate:H+)
R90157	1 Citrate (E) + 1 H+ (pmf associated) <=> 1 Citrate + 1 H+	1 CE00158 + 1 C90000 <=> 1 C00158 + 1 C00080		NP1278A NP3906A		Symport: (Citrate:H+)
R90158	1 Magnesium (E) + 1 ATP + 1 H2O => 1 Magnesium + 1 ADP + 1 Orthophosphate + 1 H+	1 CE00305 + 1 C00002 + 1 C00001 => 1 C00305 + 1 C00008 + 1 C00009 + 1 C00080		NP0222A NP0222A NP2472A		ABC-T: (Magnesium)
R90159	1 Pyruvate (E) + 1 H+ (pmf associated) <=> 1 Pyruvate + 1 H+	1 CE00022 + 1 C90000 <=> 1 C00022 + 1 C00080				Symport: (pyruvate)
R90160	1 Thymine (E) + 1 H+ (pmf associated) <=> 1 Thymine + 1 H+	1 CE00178 + 1 C90000 <=> 1 C00178 + 1 C00080				Symport: (Thymine:H+)
R90161	1 Cytosine (E) + 1 H+ (pmf associated) <=> 1 Cytosine + 1 H+	1 CE00380 + 1 C90000 <=> 1 C00380 + 1 C00080				Symport: (Cytosine:H+)
R90162	1 Uracil (E) + 1 H+ (pmf associated) <=> 1 Uracil + 1 H+	1 CE00106 + 1 C90000 <=> 1 C00106 + 1 C00080				Symport: (Uracil:H+)
R90163	1 Uridine (E) + 1 H+ (pmf associated) <=> 1 Uridine + 1 H+	1 CE00299 + 1 C90000 <=> 1 C00299 + 1 C00080				Symport: (Uridine:H+)
R90164	1 Glycolaldehyde => 1 Glycolaldehyde (E)	1 C00266 => 1 CE00266				Excretion: (Glycoaldehyde)
RM00001	1 BM: Amino acids (OD ml) + 1 BM: S-layer glyco (OD ml) + 1 BM: DNA (OD ml) + 1 BM: RNA (OD ml) + 1 BM: Lipids (OD ml) + 1 BM: Salts (OD ml) + 1 BM: Cofactors (OD ml) => 1 Biomass (OD ml)	1 CM00005 + 1 CM00002 + 1 CM00006 + 1 CM00007 + 1 CM00009 + 1 CM00010 + 1 CM00008 => 1 CM00001				Growth: (Assemble)
RM00002	248.21 L-Alanine + 24.82 L-Cysteine + 325.68 L-Aspartate + 368.67 L-Glutamate + 107.76 L-Phenylalanine + 249.99 Glycine + 46.48 L-Histidine + 121.33 L-Isoleucine + 97.7 L-Lysine + 210.08 L-Leucine + 55.06 L-Methionine + 81.42 L-Asparagine + 159.82 L-Proline + 110.12 L-Glutamine + 168.82 L-Arginine + 148.08 L-Serine + 185.04 L-Threonine + 213.87 L-Valine + 33.73 L-Tryptophan + 74.12 L-Tyrosine => …	248.21 C00041 + 24.82 C00097 + 325.68 C00049 + 368.67 C00025 + 107.76 C00079 + 249.99 C00037 + 46.48 C00135 + 121.33 C00407 + 97.7 C00047 + 210.08 C00123 + 55.06 C00073 + 81.42 C00152 + 159.82 C00148 + 110.12 C00064 + 168.82 C00062 + 148.08 C00065 + 185.04 C00188 + 213.87 C00183 + 33.73 C00078 + 74.12 C00082 => 1 CM00005				Growth: Protein
RM00003	4.44 N-Acetyl-D-glucosamine 6-phosphate + 9.61 D-Glucose + 9.61 D-Galactose + 20.7 Sulfate => 4.44 Orthophosphate + 1 BM: S-layer glyco (OD ml)	4.44 C00357 + 9.61 C00031 + 9.61 C00124 + 20.7 C00059 => 4.44 C00009 + 1 CM00002				Growth: S-layer glyco
RM00004	3.73 dATP + 3.73 dTTP + 2.16 dCTP + 2.16 dGTP => 11.78 Pyrophosphate + 1 BM: DNA (OD ml)	3.73 C00131 + 3.73 C00459 + 2.16 C00458 + 2.16 C00286 => 11.78 C00013 + 1 CM00006				Growth: DNA
RM00005	21.16 ATP + 21.16 UTP + 12.21 CTP + 12.21 GTP => 66.74 Pyrophosphate + 1 BM: RNA (OD ml)	21.16 C00002 + 21.16 C00075 + 12.21 C00063 + 12.21 C00044 => 66.74 C00013 + 1 CM00007				Growth: RNA
RM00006	0.04 FAD + 0.04 NAD+ + 0.04 NADP+ + 0.06 Tetrahydrofolate + 0.06 5,10-Methylenetetrahydrofolate + 0.06 10-Formyltetrahydrofolate + 0.03 Siroheme + 0.02 Cobamide coenzyme + 0.04 CoA + 0.1 Retinal + 0.02 Menaquinone => 1 BM: Cofactors (OD ml)	0.04 C00016 + 0.04 C00003 + 0.04 C00006 + 0.06 C00101 + 0.06 C00143 + 0.06 C00234 + 0.03 C00748 + 0.02 C00194 + 0.04 C00010 + 0.1 C00376 + 0.02 C00828 => 1 CM00008				Growth: Cofactors
RM00007	23.58 2,3-Di-O-phytanyl-sn-glycerol => 1 BM: Lipids (OD ml)	23.58 C13863 => 1 CM00009				Growth: Lipids
RM00008	2813.36 Cl- + 2813.36 Sodium => 1 BM: Salts (OD ml)	2813.36 C00698 + 2813.36 C01330 => 1 CM00010				Growth: Salts

## Sheet: Exchange
id	reaction_using_names	reaction_using_ids	name
ER00000	<=> 1 L-Tryptophan (E)	<=> 1 CE00078	Exchange (L-Tryptophan)
ER00001	<=> 1 Sulfate (E)	<=> 1 CE00059	Exchange: (Sulfate)
ER00002	<=> 1 Glycine (E)	<=> 1 CE00037	Exchange: (Glycine)
ER00003	<=> 1 L-Histidine (E)	<=> 1 CE00135	Exchange: (L-Histidine)
ER00004	<=> 1 L-Arginine (E)	<=> 1 CE00062	Exchange: (L-Arginine)
ER00005	<=> 1 L-Valine (E)	<=> 1 CE00183	Exchange: (L-Valine)
ER00006	<=> 1 L-Leucine (E)	<=> 1 CE00123	Exchange: (L-Leucine)
ER00007	<=> 1 L-Methionine (E)	<=> 1 CE00073	Exchange: (L-Methionine)
ER00008	<=> 1 L-Phenylalanine (E)	<=> 1 CE00079	Exchange: (Phenylalanine)
ER00009	<=> 1 L-Lysine (E)	<=> 1 CE00047	Exchange: (L-Lysine)
ER00010	<=> 1 L-Alanine (E)	<=> 1 CE00041	Exchange: (L-Alanine)
ER00011	<=> 1 L-Serine (E)	<=> 1 CE00065	Exchange: (L-Serine)
ER00012	<=> 1 L-Glutamine (E)	<=> 1 CE00064	Exchange: (L-Glutamine)
ER00013	<=> 1 L-Glutamate (E)	<=> 1 CE00025	Exchange: (L-Glutamate)
ER00014	<=> 1 L-Cysteine (E)	<=> 1 CE00097	Exchange: (L-Csyteine)
ER00015	<=> 1 L-Proline (E)	<=> 1 CE00148	Exchange: (L-Proline)
ER00016	<=> 1 L-Threonine (E)	<=> 1 CE00188	Exchange: (L-Threonine)
ER00017	<=> 1 L-Aspartate (E)	<=> 1 CE00049	Exchange: (L-Aspartate)
ER00018	<=> 1 Orthophosphate (E)	<=> 1 CE00009	Exchange: (Orthophosphate)
ER00019	<=> 1 Nitrate (E)	<=> 1 CE00244	Exchange: (Nitrate)
ER00020	<=> 1 L-Asparagine (E)	<=> 1 CE00152	Exchange: (L-Asparagine)
ER00021	<=> 1 L-Isoleucine (E)	<=> 1 CE00407	Exchange: (L-Isoleucine)
ER00022	<=> 1 Iron (E)	<=> 1 CE00023	Exchange: (Iron)
ER00023	<=> 1 L-Tyrosine (E)	<=> 1 CE00082	Exchange: (L-Tyrosine)
ER00024	<=> 1 H2O (E)	<=> 1 CE00001	Free: (H2O)
ER00027	<=> 1 CO2 (E)	<=> 1 CE00011	Free: (CO2)
ER00028	<=> 1 Oxygen (E)	<=> 1 CE00007	Free: (Oxygen)
ER00048	<=> 1 Folate (E)	<=> 1 CE00504	Exchange: (Folate)
ER00049	<=> 1 Thiamin (E)	<=> 1 CE00378	Exchange: (Thiamin)
ER00054	<=> 1 Hydrogen (E)	<=> 1 CE00282	Free: (Hydrogen)
ER00059	<=> 1 Cobamide coenzyme (E)	<=> 1 CE00194	Exchange: (Cobalamide Coenzyme)
ER00083	<=> 1 Cobalt (E)	<=> 1 CE00175	Exchange: (Cobalt)
ER00086	<=> 1 NH3 (E)	<=> 1 CE00014	Exchange: (NH3)
ER00093	<=> 1 Biotin (E)	<=> 1 CE00120	Exchange: (Biotin)
ER00095	<=> 1 Sodium (E)	<=> 1 CE01330	Exchange: (Na+)
ER00096	<=> 1 Potassium (E)	<=> 1 CE00238	Exchange: (K+)
ER00100	<=> 1 Adenosine (E)	<=> 1 CE00212	Exchange: (Adenosine)
ER00101	<=> 1 Thymidine (E)	<=> 1 CE00214	Exchange: (Thymidine)
ER00102	<=> 1 Cytidine (E)	<=> 1 CE00475	Exchange: (Cytidine)
ER00103	<=> 1 Guanosine (E)	<=> 1 CE00387	Exchange: (Guanosine)
ER00104	<=> 1 Deoxyadenosine (E)	<=> 1 CE00559	Exchange: (Deoxyadenosine)
ER00105	<=> 1 Deoxyuridine (E)	<=> 1 CE00526	Exchange: (Deoxyuridine)
ER00106	<=> 1 Deoxycytidine (E)	<=> 1 CE00881	Exchange: (Deoxycytidine)
ER00107	<=> 1 Deoxyguanosine (E)	<=> 1 CE00330	Exchange: (Deoxyguanosine)
ER00108	<=> 1 D-Ribose (E)	<=> 1 CE00121	Exchange: (D-Ribose)
ER00111	<=> 1 Photon	<=> 1 C90001	Exchange: (Photon)
ER00112	<=> 1 D-Glucose (E)	<=> 1 CE00031	Exchange: (Glucose)
ER00119	<=> 1 Cl- (E)	<=> 1 CE00698	Exchange: (Cl-)
ER00121	<=> 1 Acetate (E)	<=> 1 CE00033	Exchange: (Acetate)
ER00122	<=> 1 D-Galactose (E)	<=> 1 CE00124	Exchange: (D-Galactose)
ER00124	<=> 1 L-Ornithine (E)	<=> 1 CE00077	Exchange: (Ornithine)
ER00125	<=> 1 Biomass (OD ml)	<=> 1 CM00001	Sink: (Biomass)
ER00126	<=> 1 Succinate (E)	<=> 1 CE00042	Exchange: (Succinate)
ER00135	<=> 1 Hexadecanoic acid (E)	<=> 1 CE00249	Exchange: (Hexadecanoic Acid)
ER00136	<=> 1 Pyruvate (E)	<=> 1 CE00022	Exchange: (Pyruvate)
ER00137	<=> 1 Molybdenum (E)	<=> 1 CE00150	Exchange (Molybdenum)
ER00138	<=> 1 (S)-Malate (E)	<=> 1 CE00149	Exchange: (Malate)
ER00139	<=> 1 Fumarate (E)	<=> 1 CE00122	Exchange: (Fumarate)
ER00140	<=> 1 L-Citrulline (E)	<=> 1 CE00327	Exchange: (L-Citrulline)
ER00141	<=> 1 Copper (E)	<=> 1 CE00070	Exchange: (Copper)
ER00142	<=> 1 Manganese (E)	<=> 1 CE00034	Exchange: (Manganese)
ER00143	<=> 1 Cadmium (E)	<=> 1 CE01413	Exchange: (Cadmium)
ER00144	<=> 1 Zinc (E)	<=> 1 CE00038	Exchange: (Zinc)
ER00145	<=> 1 Magnesium (E)	<=> 1 CE00305	Exchange: (Magnesium)
ER00146	<=> 1 H+ (E)	<=> 1 CE00080	Exchange: (H+)
ER00147	<=> 1 Citrate (E)	<=> 1 CE00158	Exchange: (Citrate)
ER00148	<=> 1 (R)-Lactate (E)	<=> 1 CE00256	Exchange: (Lactate)
ER00149	<=> 1 Glycerol 1-phosphate (E)	<=> 1 CE00623	Exchange: (Glycerol 1-p)
ER00150	<=> 1 Glycerol (E)	<=> 1 CE00116	Exchange: (Glycerol)
ER00151	<=> 1 3-Phospho-D-Glycerate (E)	<=> 1 CE00197	Exchange: (3-P-D-Glycerate)
ER00152	<=> 1 Betaine (E)	<=> 1 CE00719	Exchange: (Betaine)
ER00153	<=> 1 Formate (E)	<=> 1 CE00058	Exchange: (Formate)
ER00154	<=> 1 Oxalate (E)	<=> 1 CE00209	Exchange: (Oxalate)
ER00155	<=> 1 Pantothenate (E)	<=> 1 CE00864	Exchange: (Pantothenate)
ER00156	<=> 1 Ferrichrome (E)	<=> 1 CE06228	Exchange: (Ferrichrome)
ER00157	<=> 1 Vitamin B12 (E)	<=> 1 CE05776	Exchange: (Vit B12)
ER00158	<=> 1 Adenosine-GDP-Cobinamide (E)	<=> 1 CE06510	Exchange: (Adenosine-GDP-cobinamide)
ER00159	<=> 1 Adenine (E)	<=> 1 CE00147	Exchange: (Adenine)
ER00160	<=> 1 Thymine (E)	<=> 1 CE00178	Exchange: (Thymine)
ER00161	<=> 1 Cytosine (E)	<=> 1 CE00380	Exchange: (Cytosine)
ER00162	<=> 1 Guanine (E)	<=> 1 CE00242	Exchange: (Guanine)
ER00163	<=> 1 Uracil (E)	<=> 1 CE00106	Exchange: (Uracil)
ER00164	<=> 1 Uridine (E)	<=> 1 CE00299	Exchange: (Uridine)
ER00165	<=> 1 Inosine (E)	<=> 1 CE00294	Exchange: (Inosine)
ER00166	<=> 1 Hypoxanthine (E)	<=> 1 CE00262	Exchange: (Hypoxanthine)
ER00167	<=> 1 Arsenite (E)	<=> 1 CE06697	Exchange: (Arsenite)
ER00168	<=> 1 Phosphonate (E)	<=> 1 CE06701	Exchange: (Phosphonate)
ER00169	<=> 1 Glycolaldehyde (E)	<=> 1 CE00266	Exchange: (Glycoaldehyde)
